# Supplementary material for: The cost of inaction on physical inactivity to public health-care systems: a population-attributable fraction analysis
Source: PubMed Central journal article supplement (PMC9748301; doi:10.1016/s2214-109x(22)00464-8), 2022-12-05
Supplement: mmc1.pdf [file mmc1.pdf]

# THE LANCET

## Global Health

### Supplementary appendix

This appendix formed part of the original submission and has been peer reviewed. We post it as supplied by the authors.

Supplement to: Santos AC, Willumsen J, Meheus F, Ilbawi A, Bull FC. The cost of inaction on physical inactivity to public health-care systems: a population-attributable fraction analysis. *Lancet Glob Health* 2022; published online Dec 5. [https://doi.org/10.1016/S2214-109X\(22\)00464-8](https://doi.org/10.1016/S2214-109X(22)00464-8).

## SUPPLEMENTARY MATERIAL

### Table of Contents

|                                                                                                                                                                                 |    |
|---------------------------------------------------------------------------------------------------------------------------------------------------------------------------------|----|
| 1. A conceptual framework .....                                                                                                                                                 | 2  |
| Figure S1. Conceptual framework .....                                                                                                                                           | 2  |
| 2. Discussion of the incidence and prevalence approaches to calculating the cost of illness .....                                                                               | 3  |
| 3. Methodological steps to estimate the economic cost of NCDs & mental health conditions per year attributable to physical inactivity .....                                     | 4  |
| Figure S2. Methodological steps to estimate the economic cost of NCDs & mental health conditions per year attributable to physical inactivity .....                             | 4  |
| 4. Additional information about the sources of cost data for dementia and diabetes .....                                                                                        | 5  |
| 5. Methods for assessing uncertainty .....                                                                                                                                      | 6  |
| References .....                                                                                                                                                                | 7  |
| Table S1. Summary of the adjusted relative risks per selected health outcomes, comparisons for summary relative risks, and number of studies and individuals included .....     | 9  |
| Table S2. Estimated populational attributable fraction (PAFs) by health outcomes and countries (% and 95% confidence interval), 2020 .....                                      | 10 |
| Table S3. Estimated populational attributable fraction (PAFs) by health outcomes, WHO Regions, and World Bank income classification (% and 95% confidence interval), 2020 ..... | 23 |
| Table S4. Estimated direct healthcare cost per incident case of cancer by WHO Region and country in US\$ 2020 .....                                                             | 24 |
| Table S5. Estimated direct healthcare costs for stroke, coronary heart disease and hypertension, by country and WHO Regions, in US\$ 2020 .....                                 | 30 |
| Table S6. Total number of estimated cases by health outcomes attributed to physical inactivity by country, 2020-2030 .....                                                      | 35 |
| Table S7. Total number of estimated cases by health outcomes attributed to physical inactivity by WHO Regions and World Bank income classification, 2020-2030 .....             | 49 |
| Table S8. Direct healthcare costs attributable to physical inactivity, by health outcomes and by country (in US\$), 2020-2030 .....                                             | 51 |
| Table S9. Direct healthcare costs attributable to physical inactivity, by health outcomes and by country (in 1,000,000 INT\$), 2020-2030 .....                                  | 68 |
| Table S10. Direct healthcare costs attributable to physical inactivity, by health outcomes, WHO regions and World Bank income classification (in US\$), 2020-2030 .....         | 75 |
| Table S11. Sensitivity analysis: varying costs of incident cases by -30% and -50%, by WHO Regions and World Bank income classification, in US\$, 2020-2030 .....                | 77 |
| Appendix 1. WHO Regions and countries .....                                                                                                                                     | 78 |
| Appendix 2. Estimating the costs for diabetes complications: the approach used to avoid double counting .....                                                                   | 79 |

## 1. A conceptual framework

Figure S1 presents a conceptual framework for the study and the analytical associations between the key variables used to estimate the burden of diseases attributable to physical inactivity. It shows that levels of **physical inactivity** are associated with **new (incident) cases of NCDs and mental health conditions** and the other established risk factors that can also influence the risk of developing these conditions (for example, the development of coronary heart disease (CHD) is associated with other known risk factors, including, tobacco use, harmful use of alcohol, unhealthy diet and air pollution as well as hypertension and diabetes, and other socio-economic characteristics of individuals (e.g., level of education)).<sup>1-3</sup> Other non-modifiable factors also affect the likelihood of NCD and mental health conditions such as age, sex, genetic predisposition, and unknown risk.<sup>1</sup> Collectively these are known as **confounders**, and are factors that influence both the exposure (i.e., physical inactivity) and the NCDs or mental health outcomes.<sup>4</sup>

**Relative risk (RR)** is a measure commonly used to represent the effect of physical inactivity on diseases.<sup>5</sup> It measures the ratio of the probability of a disease outcome (e.g. CHD) in the physically inactive group (known as 'exposed') to the probability of CHD in the physically active group (known as 'unexposed'). It can be adjusted or not adjusted for potential confounders factors (crude RR).<sup>6</sup> For this study, we used an adjusted RR.

The public health impact of new cases of NCDs and mental health conditions attributable to physical inactivity, can be estimated using the **population attributable fraction (PAF)**, which is in function of the (adjusted) RRs and the prevalence of physical inactivity (exposure).<sup>7</sup> PAF provides an estimate of the proportion of the disease that can be attributed to physical inactivity.

**Figure S1. Conceptual framework**

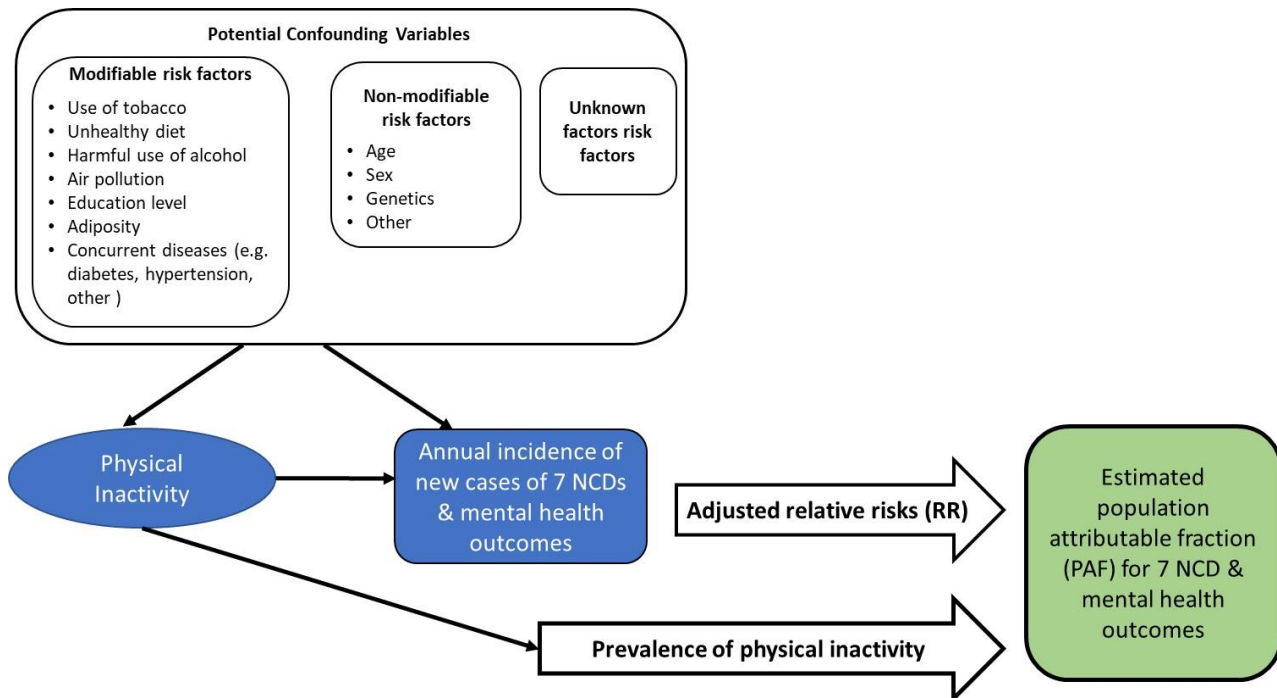

## 2. Discussion of the incidence and prevalence approaches to calculating the cost of illness

There are two main approaches used to estimate the cost of illness: the prevalence and the incident approaches.<sup>8</sup> In the prevalence approach, the direct costs for any disease or group of diseases are estimated.<sup>8</sup> Prevalence includes new cases and existing cases (and costs) of diseases occurring in a given period (typically, in a year).<sup>9</sup> The prevalence approach can answer the question of *what are the current (and future) costs of existing disease (s)?* The prevalence approach would help decision-makers understand the current economic burden of disease to plan their budget allocation for the *management of existing diseases*, in the present and make provisions for future years. However, this approach **cannot** answer questions *what is the proportion of costs (and cases) that could be eliminated or reduced if a risk factor is eliminated or reduced (e.g., physical inactivity)?*<sup>10</sup> This question is of importance to policy makers in their decisions about resource allocation for investments in health prevention and promotion, the foundations of the UN Sustainable Development Goals (SDGs).

The **incidence approach** is typically based on microsimulation models. Microsimulation models are the most rigorous and common approach used for modelling and projecting the long-term health impacts of a disease.<sup>11,12</sup> It starts with a cohort of new cases of disease and follows this cohort for life (this is different from using prevalent cases), until death, and assesses the costs of complications that can occur for those new cases in a lifetime (ideal time horizon). The complications are defined by health status (proportion) and transition probabilities (e.g., the probability of an individual progressing from one health status, say, from diabetic nephropathy to another, say end-stage renal disease, or to death).<sup>13</sup> Although a microsimulation incidence approach is considered the “gold standard” for economic analysis, there is a lack of data available for health status and transition probabilities on a worldwide scale to allow us to conduct this assessment. Health status and transition probabilities are dependent on healthcare quality and accessibility, household socio-economic background, and affordability, which differ largely amongst countries, even among high-income countries.

### 3. Methodological steps to estimate the economic cost of NCDs & mental health conditions per year attributable to physical inactivity

Figure S2 shows the key steps undertaken to estimate the economic cost of NCDs & mental health conditions per year attributable to physical inactivity - referred to as the “cost of inaction” on physical inactivity.

Step 1 combined information of the adjusted RRs and the prevalence of physical inactivity to estimate the PAF. The PAF was multiplied by the estimates of annual incidence of seven NCDs and mental conditions in 2020. We then applied UN population projections to estimate the annual incidence of seven NCDs and mental conditions from 2020 to 2030 (health burden). We opted to use a **simple incidence approach** where we estimated the *yearly* attributable health burden for each disease associated with physical inactivity (incident cases occurring yearly  $\times$  PAF) – this approach also helps to minimise the potential effect of diseases overlapping for the assessment of the economic burden of physical inactivity as a risk factor.

Step 2 multiplied the annual health burden of each disease attributed to physical inactivity by the estimated annual average direct healthcare cost per disease, which was projected from 2020 to 2030 by using inflation rates as estimated by the World Bank<sup>14</sup>, to produce an estimate attributable economic burden of diseases associated with physical inactivity.

**Figure S2. Methodological steps to estimate the cost of NCDs & mental health conditions per year attributable to physical inactivity**

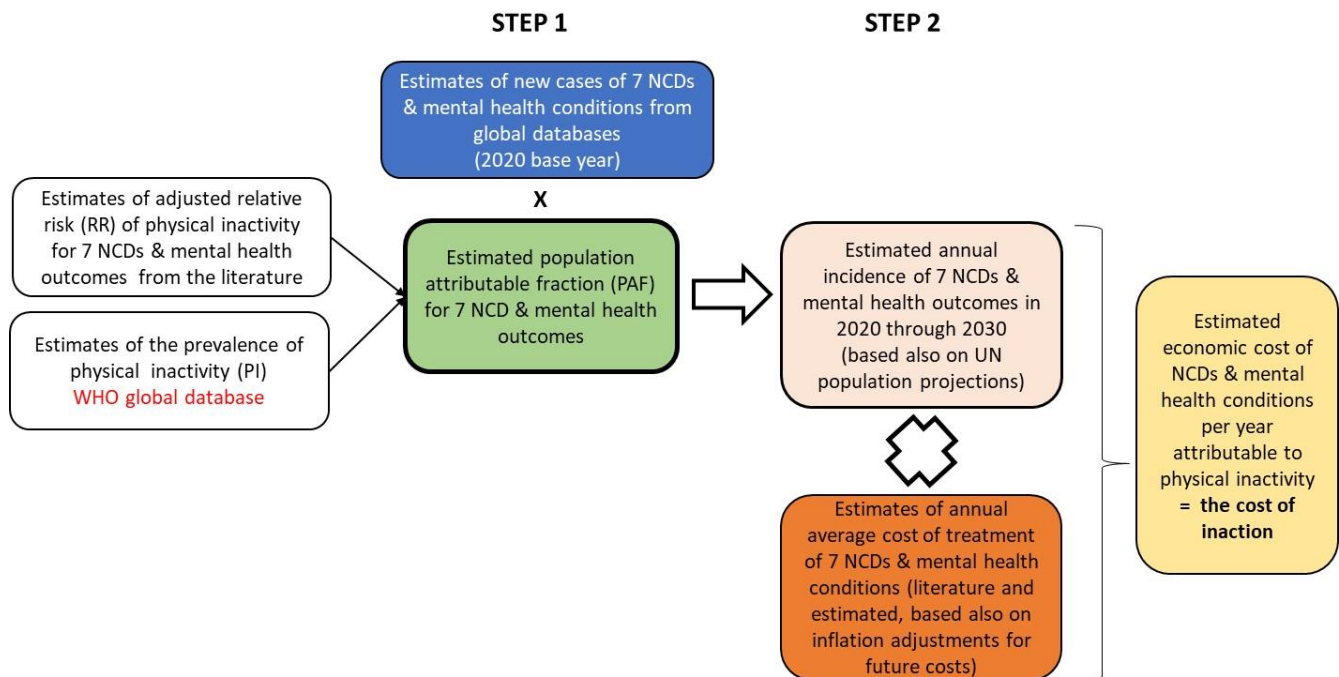

#### 4. Additional information about the sources of cost data for dementia and diabetes

**Dementia.** Data were obtained from the WHO Mental Health Unit using findings from a commissioned systematic literature review assessing the use of resources and costs to treat dementia.<sup>15</sup> Direct medical care costs to the public health system was estimated as the costs of hospital care, drugs, diagnostic tests, and visits to clinics (specialist care, primary care). New cases of patients with dementia can arrive at the public health system in an initial or more advanced stage of the disease. The costs estimated by the WHO Unit assumed an average of these costs. Costs of more advanced stage dementia include those not always borne by the public health system, such as community services related to food supply ('meals on wheels'), transport, and residential or nursing home care/long-term care. Therefore, these potentially 'external' costs were not included. Direct medical costs per patient with dementia were estimated for the WHO Regions and World Bank country income levels, not by country.

**Diabetes.** Data were obtained from cost estimates developed by International Diabetes Federation (IDF) and they included the provision of health services (preventive and curative), family planning activities, nutrition activities, and emergency aid designated for health, which include mild to moderate cases (i.e., those manageable at primary care facilities and that usually do not require treatment for complications) and severe cases (e.g., those with kidney failure). We assessed from the literature that it is not uncommon for new patients of type 2 diabetes (or any other particular health outcome) to be diagnosed for the first time (incidence) and presented in the health system with complications, even in high-income countries. For example, a retrospective cohort study in the United States demonstrated that a substantial proportion of patients with type 2 diabetes had existing complications, especially chronic kidney disease.<sup>16</sup> Recognising that severe cases can overestimate the cost of illness, and reflecting on the fact that the costs of diabetes hugely vary among countries, reflecting not only the country's prevalence of the disease but also access to and quality of its health system, we decided to adopt an average cost for estimates by WHO Region and World Bank income classification, rather than median or weighted costs; thus, we avoided the influence of countries with big populations and big costs to the Region and income group levels. For example, the average annual cost of treatment for diabetes, per patient, in the U.S. was estimated by IDF at US\$ 379,470 while for Brazil and Germany, it was estimated at US\$ 42,928 and US\$ 41,296, respectively.<sup>17</sup> The cost of almost 9 times in the U.S compared to Brazil and Germany essentially reflects the characteristics of their health system, where in the U.S. private insurance defines their prices, while in Brazil and Germany, the population has access to a public health system for treatment, although in Brazil with a much less extent coverage compared to Germany. We used IDF country-specific cost estimates to assess the costs at the country level.

## 5. Methods for assessing uncertainty

Uncertainty in economic and epidemiological analyses is typically related to four main areas: the variability of data (inputs), generalisability and extrapolation of data, and the appropriateness of the analytical method.<sup>23</sup> One-way or multivariate deterministic analysis, when one or multiple parameters are varied to assess uncertainties in the modelling, is the most common approach used in economic evaluation. It allows the analyst to assess the four main areas of uncertainty in economic studies as described above. However, some limitations are related to this method, the main ones being the choice of the variables and what alternative values are included in the sensitivity analysis, creating the potential for selection bias.<sup>24</sup> Alternatively, probabilistic sensitivity analysis, using Monte Carlo simulations would overcome this issue by computing confidence intervals for mean costs and effects, and allowing for a degree of variation in the results, producing, at least in theory, more robust results.<sup>25</sup>

To conduct a Monte Carlo probabilistic sensitivity analysis, one would need to define a variable quantity with a known range of possible values and an associated distribution function for each parameter (or at least, for the main parameters) used in the modelling.<sup>26,27</sup> For example, it would be necessary to know or make reasonable assumptions about the (assumed) variation of the upper- and lower-limit of the baseline values, their statistical distribution (e.g., normal, log-normal), and the standard deviation and standard error, for each variable. An accurate and robust Monte Carlo probabilistic sensitivity analysis is only possible to the extent that the assumed distributions and their parameters are correctly specified.<sup>26,27</sup>

However, we do not have the necessary data for the main parameters of our analysis, i.e., RRs, the prevalence of physical inactivity, and costing data; thus, assumptions would need to be made.

Costing data is the main source of uncertainty in our analysis, given that the RRs and their confidence intervals were estimated based on a strong GRADE assessment.<sup>28</sup> Similarly, the prevalence of physical inactivity has been standardised to remove confounding effects.<sup>29</sup>

Given the scope of analysis and the restriction of data, we opted for a one-way deterministic sensitivity analysis where we assumed a reduction in costs of 30% and 50% on the mean estimated costs. These parameters were based on discussions with experts from the WHO, and who have experience with the cost of disease treatment and management in low- and middle-income countries. They believe the range adopted would reflect the possible variation in costs in those income settings.

## References

- 1 Havranek EP, Mujahid MS, Barr DA, *et al.* Social Determinants of Risk and Outcomes for Cardiovascular Disease: A Scientific Statement From the American Heart Association. *Circulation* 2015; **132**: 873–98.
- 2 Hajar R. Risk factors for coronary artery disease: Historical perspectives. *Heart Views* 2017; **18**: 109.
- 3 Joshi SS, Miller MR, Newby DE. Air pollution and cardiovascular disease: the Paul Wood Lecture, British Cardiovascular Society 2021. *Heart* 2022; **108**: 1267–73.
- 4 McNamee R. Confounding and confounders. *Occupational and Environmental Medicine* 2003; **60**: 227–34.
- 5 Katzmarzyk PT, Friedenreich C, Shiroma EJ, Lee I-M. Physical inactivity and non-communicable disease burden in low-income, middle-income and high-income countries. *Br J Sports Med* 2021; : bjsports-2020-103640.
- 6 Tenny S, Hoffman MR. Relative Risk. In: StatPearls. Treasure Island (FL): StatPearls Publishing, 2022. <http://www.ncbi.nlm.nih.gov/books/NBK430824/> (accessed Oct 9, 2022).
- 7 Rockhill B, Newman B, Weinberg C. Use and misuse of population attributable fractions. *Am J Public Health* 1998; **88**: 15–9.
- 8 Tarricone R. Cost-of-illness analysis. *Health Policy* 2006; **77**: 51–63.
- 9 Sedgwick P. Prevalence and incidence. *BMJ* 2010; **341**: c4709–c4709.
- 10 Byford S. Economic Note: Cost of illness studies. *BMJ* 2000; **320**: 1335–1335.
- 11 Caro JJ, Briggs AH, Siebert U, Kuntz KM. Modeling Good Research Practices—Overview: A Report of the ISPOR-SMDM Modeling Good Research Practices Task Force-1. *Value in Health* 2012; **15**: 796–803.
- 12 Lay-Yee R, Cotterell G. The Role of Microsimulation in the Development of Public Policy. In: Janssen M, Wimmer MA, Deljoo A, eds. Policy Practice and Digital Science. Cham: Springer International Publishing, 2015: 305–20.
- 13 Krijnkamp EM, Alarid-Escudero F, Enns EA, Jalal HJ, Hunink MGM, Pechlivanoglou P. Microsimulation Modeling for Health Decision Sciences Using R: A Tutorial. *Med Decis Making* 2018; **38**: 400–22.
- 14 World Bank. Inflation, consumer prices (annual %): International Monetary Fund, International Financial Statistics and data files. 2021. <https://data.worldbank.org/indicator/FP.CPI.TOTL.ZG>.
- 15 World Health Organization. Global status report on the public health response to dementia. Geneva: World Health Organization, 2021 <https://apps.who.int/iris/handle/10665/344701> (accessed Nov 29, 2021).
- 16 An J, Nichols GA, Qian L, *et al.* Prevalence and incidence of microvascular and macrovascular complications over 15 years among patients with incident type 2 diabetes. *BMJ Open Diab Res Care* 2021; **9**: e001847.
- 17 International Diabetes Federation (IDF). Diabetes-related health expenditure per person, USD: IDF Diabetes Atlas 10th edition 2021. Diabetes-related health expenditure. <https://diabetesatlas.org/data/en/indicators/19/> (accessed Nov 19, 2021).
- 18 National Health Services (NHS). National Cost Collection for the NHS, 2019-2020. 2020. <https://www.england.nhs.uk/costing-in-the-nhs/national-cost-collection/> (accessed May 8, 2021).
- 19 OECD, European Union. Health at a Glance: Europe 2018: State of Health in the EU Cycle. OECD, 2018 DOI:10.1787/health\_glance\_eur-2018-en.
- 20 OECD. OECD Stats. OECD Stats. 2020. <https://stats.oecd.org/> (accessed July 15, 2021).
- 21 Munich Center for the Economics of Aging (MEA). SHARE - Survey of Health, Ageing and Retirement in Europe. 2020. <http://www.share-project.org/home0.html> (accessed July 15, 2021).
- 22 Luengo-Fernandez R, Violato M, Candio P, Leal J. Economic burden of stroke across Europe: A population-based cost analysis. *European Stroke Journal* 2020; **5**: 17–25.
- 23 Briggs A, Sculpher M, Buxton M. Uncertainty in the economic evaluation of health care technologies: The role of sensitivity analysis. *Health Econ* 1994; **3**: 95–104.
- 24 Briggs AH. Handling Uncertainty in Cost-Effectiveness Models: *PharmacoEconomics* 2000; **17**: 479–500.
- 25 Halpern EF, Weinstein MC, Hunink MGM, Gazelle GS. Representing Both First- and Second-order Uncertainties by Monte Carlo Simulation for Groups of Patients. *Med Decis Making* 2000; **20**: 314–22.
- 26 Claxton K, Sculpher M, McCabe C, *et al.* Probabilistic sensitivity analysis for NICE technology assessment: not an optional extra. *Health Econ* 2005; **14**: 339–47.
- 27 Hattiswell AJ, Bullement A, Briggs A, Paulden M, Stevenson MD. Probabilistic Sensitivity Analysis in Cost-Effectiveness Models: Determining Model Convergence in Cohort Models. *PharmacoEconomics* 2018; **36**: 1421–6.
- 28 World Health Organization. WHO Guidelines on Physical Activity and Sedentary Behaviour. 2020.
- 29 Guthold R, Stevens GA, Riley LM, Bull FC. Global trends in insufficient physical activity among adolescents: a pooled analysis of 298 population-based surveys with 1-6 million participants. *The Lancet Child & Adolescent Health* 2020; **4**: 23–35.
- 30 Schuch FB, Vancampfort D, Firth J, *et al.* Physical Activity and Incident Depression: A Meta-Analysis of Prospective Cohort Studies. *AJP* 2018; **175**: 631–48.
- 31 Kyu HH, Bachman VF, Alexander LT, *et al.* Physical activity and risk of breast cancer, colon cancer, diabetes, ischemic heart disease, and ischemic stroke events: systematic review and dose-response meta-analysis for the Global Burden of Disease Study 2013. *BMJ* 2016; : i3857.
- 32 Liu X, Zhang D, Liu Y, *et al.* Dose-Response Association Between Physical Activity and Incident Hypertension: A Systematic Review and Meta-Analysis of Cohort Studies. *Hypertension* 2017; **69**: 813–20.
- 33 Matthews CE, Moore SC, Arem H, *et al.* Amount and Intensity of Leisure-Time Physical Activity and Lower Cancer Risk. *JCO* 2020; **38**: 686–97.



- 34 Kivimäki M, Singh-Manoux A, Pentti J, *et al.* Physical inactivity, cardiometabolic disease, and risk of dementia: an individual-participant meta-analysis. *BMJ* 2019; : 11495.
- 35 Livingston G, Huntley J, Sommerlad A, *et al.* Dementia prevention, intervention, and care: 2020 report of the Lancet Commission. *The Lancet* 2020; **396**: 413–46.
- 36 The Emerging Risk Factors Collaboration. Diabetes mellitus, fasting blood glucose concentration, and risk of vascular disease: a collaborative meta-analysis of 102 prospective studies. *The Lancet* 2010; **375**: 2215–22.

**Table S1. Summary of the adjusted relative risks per selected health outcomes, comparisons for summary relative risks, and number of studies and individuals included**

| Outcomes and sources of information                                    | Relative risk (95% CI) | Comparisons for summary relative risk                                                         | Number of studies and individuals included <sup>&amp;</sup>                 |
|------------------------------------------------------------------------|------------------------|-----------------------------------------------------------------------------------------------|-----------------------------------------------------------------------------|
| Depression*<br><i>Schuch et al., 2018</i> <sup>30</sup>                | 1.28 (1.01 to 1.62)    | Lowest vs 150min of moderate-to-vigorous physical activity per week                           | 49 prospective studies (266,939 individuals)                                |
| Coronary heart disease (CHD)*<br><i>Kyu et al., 2016</i> <sup>31</sup> | 1.19 (1.13 to 1.26)    | <600 MET-min/week vs 600–3999 METmin/week of total physical activity across all domains       | 43 prospective studies (16,583,824 person years)                            |
| Stroke*<br><i>Kyu et al., 2016</i> <sup>31</sup>                       | 1.19 (1.09 to 1.28)    | <600 MET-min/week vs 600–3999 METmin/week of total physical activity across all domains       | 26 prospective studies (13,670,573 person years)                            |
| Type 2 diabetes*<br><i>Kyu et al., 2016</i> <sup>31</sup>              | 1.17 (1.11 to 1.23)    | <600 MET-min/week vs 600–3999 METmin/week of total physical activity across all domains       | 55 prospective studies (14,051,132 person years),                           |
| Hypertension*<br><i>Liu et al., 2017</i> <sup>32</sup>                 | 1.06 (1.03 to 1.09)    | None vs 10 MET-hour/week of leisure-time physical activity                                    | 24 prospective studies (330,222 individuals)                                |
| Bladder cancer*<br><i>Matthews et al., 2020</i> <sup>33</sup>          | 1.08 (0.93 to 1.25)    | For all cancers outcomes:<br>None vs 7.5–14.9 MET-hour/week of leisure-time physical activity | Basis for all cancers outcomes: 9 prospective studies (755,459 individuals) |
| Breast cancer*<br><i>Matthews et al., 2020</i> <sup>33</sup>           | 1.09 (1.03 to 1.15)    |                                                                                               |                                                                             |
| Colon cancer*<br><i>Matthews et al., 2020</i> <sup>33</sup>            | 1.11 (1.03 to 1.19)    |                                                                                               |                                                                             |
| Endometrial cancer*<br><i>Matthews et al., 2020</i> <sup>33</sup>      | 1.09 (0.96 to 1.22)    |                                                                                               |                                                                             |
| Oesophageal cancer*<br><i>Matthews et al., 2020</i> <sup>33</sup>      | 1.28 (0.85 to 1.96)    |                                                                                               |                                                                             |
| Gastric cancer*<br><i>Matthews et al., 2020</i> <sup>33</sup>          | 1.27 (0.93 to 1.69)    |                                                                                               |                                                                             |
| Renal cancer*<br><i>Matthews et al., 2020</i> <sup>33</sup>            | 1.28 (1.06 to 1.54)    |                                                                                               |                                                                             |
| Dementia**<br><i>Kivimäki et al., 2019</i> <sup>34</sup>               | 1.40 (1.20 to 1.70)    | Low vs moderate to vigorous physical activity                                                 | 19 observational studies (404,840 individuals)                              |

CI: confidence interval; \* as reported by Katzmarzyk and colleagues (2021);<sup>5</sup> \*\*as reported by Livingstone and colleagues (2020);<sup>35</sup> & number of studies included in the meta-analysis or pooled-analysis.

**Table S2. Estimated populational attributable fraction (PAFs) by health outcomes and countries (% and 95% confidence interval), 2020**

| African Region                   | Breast cancer       | Colorectal cancer   | Endometrial cancer   | Gastric cancer       | Oesophageal cancer   | Renal cancer        |
|----------------------------------|---------------------|---------------------|----------------------|----------------------|----------------------|---------------------|
| Algeria                          | 0.03 (0.01 to 0.06) | 0.04 (0.01 to 0.06) | 0.03 (-0.02 to 0.08) | 0.08 (-0.02 to 0.19) | 0.09 (-0.05 to 0.24) | 0.09 (0.02 to 0.15) |
| Angola                           | 0.02 (0.01 to 0.04) | 0.02 (0.01 to 0.03) | 0.02 (-0.01 to 0.05) | 0.05 (-0.01 to 0.11) | 0.05 (-0.03 to 0.15) | 0.05 (0.01 to 0.09) |
| Benin                            | 0.02 (0.01 to 0.03) | 0.02 (0 to 0.03)    | 0.02 (-0.01 to 0.04) | 0.04 (-0.01 to 0.1)  | 0.04 (-0.02 to 0.13) | 0.04 (0.01 to 0.08) |
| Botswana                         | 0.02 (0.01 to 0.04) | 0.02 (0.01 to 0.04) | 0.02 (-0.01 to 0.05) | 0.06 (-0.02 to 0.13) | 0.06 (-0.03 to 0.17) | 0.06 (0.01 to 0.1)  |
| Burkina Faso                     | 0.02 (0.01 to 0.03) | 0.02 (0.01 to 0.04) | 0.02 (-0.01 to 0.05) | 0.05 (-0.01 to 0.12) | 0.05 (-0.03 to 0.16) | 0.05 (0.01 to 0.1)  |
| Burundi                          | 0.02 (0.01 to 0.04) | 0.02 (0.01 to 0.03) | 0.02 (-0.01 to 0.05) | 0.05 (-0.01 to 0.11) | 0.05 (-0.03 to 0.15) | 0.05 (0.01 to 0.09) |
| Cabo Verde                       | 0.02 (0.01 to 0.04) | 0.02 (0.01 to 0.04) | 0.02 (-0.01 to 0.05) | 0.05 (-0.01 to 0.12) | 0.05 (-0.03 to 0.16) | 0.05 (0.01 to 0.1)  |
| Cameroon                         | 0.03 (0.01 to 0.05) | 0.03 (0.01 to 0.05) | 0.03 (-0.01 to 0.07) | 0.07 (-0.02 to 0.16) | 0.07 (-0.04 to 0.21) | 0.07 (0.02 to 0.13) |
| Central Africa Republic          | 0.01 (0 to 0.02)    | 0.02 (0 to 0.03)    | 0.01 (-0.01 to 0.03) | 0.04 (-0.01 to 0.09) | 0.04 (-0.02 to 0.12) | 0.04 (0.01 to 0.07) |
| Chad                             | 0.02 (0.01 to 0.04) | 0.02 (0.01 to 0.04) | 0.02 (-0.01 to 0.06) | 0.06 (-0.02 to 0.14) | 0.06 (-0.04 to 0.18) | 0.06 (0.01 to 0.11) |
| Comoros (The)                    | 0.02 (0.01 to 0.03) | 0.02 (0 to 0.03)    | 0.02 (-0.01 to 0.04) | 0.04 (-0.01 to 0.09) | 0.04 (-0.02 to 0.12) | *                   |
| Congo                            | 0.03 (0.01 to 0.04) | 0.03 (0.01 to 0.05) | 0.03 (-0.01 to 0.06) | 0.07 (-0.02 to 0.16) | 0.07 (-0.04 to 0.21) | 0.07 (0.02 to 0.13) |
| Côte d'Ivoire                    | 0.03 (0.01 to 0.05) | 0.04 (0.01 to 0.06) | 0.03 (-0.02 to 0.08) | 0.08 (-0.02 to 0.19) | 0.08 (-0.05 to 0.24) | 0.08 (0.02 to 0.15) |
| Democratic Republic of the Congo | 0.02 (0.01 to 0.04) | 0.03 (0.01 to 0.04) | 0.02 (-0.01 to 0.06) | 0.06 (-0.02 to 0.14) | 0.06 (-0.04 to 0.19) | 0.06 (0.01 to 0.11) |
| Equatorial Guinea                | 0.02 (0.01 to 0.04) | 0.02 (0.01 to 0.03) | 0.02 (-0.01 to 0.05) | 0.05 (-0.01 to 0.11) | 0.05 (-0.03 to 0.15) | 0.05 (0.01 to 0.09) |
| Eritrea                          | 0.03 (0.01 to 0.04) | 0.02 (0.01 to 0.04) | 0.03 (-0.01 to 0.06) | 0.06 (-0.02 to 0.13) | 0.06 (-0.03 to 0.18) | 0.06 (0.01 to 0.11) |
| Eswatini                         | 0.03 (0.01 to 0.05) | 0.03 (0.01 to 0.05) | 0.03 (-0.01 to 0.07) | 0.07 (-0.02 to 0.16) | 0.07 (-0.04 to 0.21) | 0.07 (0.02 to 0.13) |
| Ethiopia                         | 0.02 (0.01 to 0.03) | 0.02 (0 to 0.03)    | 0.02 (-0.01 to 0.04) | 0.04 (-0.01 to 0.09) | 0.04 (-0.02 to 0.13) | 0.04 (0.01 to 0.07) |
| Gabon                            | 0.03 (0.01 to 0.05) | 0.03 (0.01 to 0.05) | 0.03 (-0.01 to 0.07) | 0.06 (-0.02 to 0.15) | 0.07 (-0.04 to 0.2)  | 0.07 (0.01 to 0.12) |
| Ghana                            | 0.02 (0.01 to 0.04) | 0.02 (0.01 to 0.04) | 0.02 (-0.01 to 0.05) | 0.06 (-0.02 to 0.13) | 0.06 (-0.03 to 0.17) | 0.06 (0.01 to 0.11) |
| Guinea                           | 0.02 (0.01 to 0.03) | 0.02 (0 to 0.03)    | 0.02 (-0.01 to 0.04) | 0.04 (-0.01 to 0.09) | 0.04 (-0.02 to 0.12) | 0.04 (0.01 to 0.07) |
| Guinea-Bissau                    | 0.02 (0.01 to 0.04) | 0.02 (0.01 to 0.03) | 0.02 (-0.01 to 0.05) | 0.05 (-0.01 to 0.11) | 0.05 (-0.03 to 0.15) | 0.05 (0.01 to 0.09) |
| Kenya                            | 0.01 (0.01 to 0.02) | 0.02 (0 to 0.03)    | 0.01 (-0.01 to 0.04) | 0.04 (-0.01 to 0.1)  | 0.04 (-0.02 to 0.13) | 0.04 (0.01 to 0.08) |
| Lesotho                          | 0.01 (0 to 0.01)    | 0.01 (0 to 0.01)    | 0.01 (0 to 0.01)     | 0.02 (0 to 0.04)     | 0.02 (-0.01 to 0.06) | 0.02 (0 to 0.03)    |
| Liberia                          | 0.03 (0.01 to 0.04) | 0.03 (0.01 to 0.05) | 0.03 (-0.01 to 0.06) | 0.06 (-0.02 to 0.15) | 0.07 (-0.04 to 0.19) | 0.07 (0.01 to 0.12) |
| Madagascar                       | 0.02 (0.01 to 0.03) | 0.02 (0.01 to 0.03) | 0.02 (-0.01 to 0.04) | 0.04 (-0.01 to 0.11) | 0.05 (-0.03 to 0.14) | 0.05 (0.01 to 0.08) |
| Malawi                           | 0.02 (0.01 to 0.03) | 0.02 (0 to 0.03)    | 0.02 (-0.01 to 0.04) | 0.04 (-0.01 to 0.1)  | 0.04 (-0.02 to 0.13) | 0.04 (0.01 to 0.08) |
| Mali                             | 0.04 (0.01 to 0.07) | 0.04 (0.01 to 0.07) | 0.04 (-0.02 to 0.09) | 0.1 (-0.03 to 0.22)  | 0.1 (-0.06 to 0.28)  | 0.1 (0.02 to 0.18)  |
| Mauritania                       | 0.04 (0.01 to 0.06) | 0.04 (0.01 to 0.07) | 0.04 (-0.02 to 0.09) | 0.1 (-0.03 to 0.22)  | 0.1 (-0.07 to 0.28)  | 0.1 (0.02 to 0.18)  |
| Mauritius                        | 0.03 (0.01 to 0.05) | 0.03 (0.01 to 0.05) | 0.03 (-0.01 to 0.07) | 0.07 (-0.02 to 0.17) | 0.08 (-0.05 to 0.22) | 0.08 (0.02 to 0.14) |

|                                  |                     |                     |                      |                      |                      |                     |
|----------------------------------|---------------------|---------------------|----------------------|----------------------|----------------------|---------------------|
| Mozambique                       | 0-01 (0 to 0-01)    | 0-01 (0 to 0-01)    | 0-01 (0 to 0-01)     | 0-01 (0 to 0-04)     | 0-02 (-0-01 to 0-05) | 0-02 (0 to 0-03)    |
| Namibia                          | 0-03 (0-01 to 0-05) | 0-04 (0-01 to 0-06) | 0-03 (-0-02 to 0-08) | 0-08 (-0-02 to 0-19) | 0-09 (-0-05 to 0-24) | 0-09 (0-02 to 0-15) |
| Niger                            | 0-02 (0-01 to 0-04) | 0-02 (0-01 to 0-04) | 0-02 (-0-01 to 0-05) | 0-06 (-0-02 to 0-13) | 0-06 (-0-03 to 0-18) | 0-06 (0-01 to 0-11) |
| Nigeria                          | 0-03 (0-01 to 0-04) | 0-03 (0-01 to 0-05) | 0-03 (-0-01 to 0-06) | 0-07 (-0-02 to 0-16) | 0-07 (-0-04 to 0-21) | 0-07 (0-02 to 0-13) |
| Rwanda                           | 0-02 (0-01 to 0-03) | 0-02 (0 to 0-03)    | 0-02 (-0-01 to 0-04) | 0-04 (-0-01 to 0-09) | 0-04 (-0-02 to 0-12) | 0-04 (0-01 to 0-07) |
| Sao Tome and Principe            | 0-02 (0-01 to 0-03) | 0-02 (0 to 0-03)    | *                    | 0-04 (-0-01 to 0-1)  | 0-04 (-0-02 to 0-13) | 0-04 (0-01 to 0-08) |
| Senegal                          | 0-02 (0-01 to 0-04) | 0-02 (0-01 to 0-04) | 0-02 (-0-01 to 0-06) | 0-06 (-0-02 to 0-14) | 0-06 (-0-04 to 0-18) | 0-06 (0-01 to 0-11) |
| Seychelles                       | *                   | *                   | *                    | *                    | *                    | *                   |
| Sierra Leone                     | 0-02 (0-01 to 0-03) | 0-02 (0 to 0-03)    | 0-02 (-0-01 to 0-04) | 0-04 (-0-01 to 0-09) | 0-04 (-0-02 to 0-12) | 0-04 (0-01 to 0-07) |
| South Africa                     | 0-04 (0-01 to 0-07) | 0-04 (0-01 to 0-07) | 0-04 (-0-02 to 0-09) | 0-09 (-0-03 to 0-21) | 0-1 (-0-06 to 0-27)  | 0-1 (0-02 to 0-17)  |
| South Sudan                      | 0-02 (0-01 to 0-04) | 0-02 (0-01 to 0-03) | 0-02 (-0-01 to 0-05) | 0-05 (-0-01 to 0-11) | 0-05 (-0-03 to 0-15) | 0-05 (0-01 to 0-09) |
| the Gambia                       | 0-02 (0-01 to 0-04) | 0-02 (0-01 to 0-04) | 0-02 (-0-01 to 0-05) | 0-05 (-0-01 to 0-13) | 0-06 (-0-03 to 0-17) | *                   |
| Togo                             | 0-01 (0 to 0-02)    | 0-01 (0 to 0-02)    | 0-01 (0 to 0-02)     | 0-03 (-0-01 to 0-06) | 0-03 (-0-01 to 0-09) | 0-03 (0-01 to 0-05) |
| Uganda                           | 0-01 (0 to 0-01)    | 0-01 (0 to 0-01)    | 0-01 (0 to 0-01)     | 0-01 (0 to 0-04)     | 0-02 (-0-01 to 0-05) | 0-02 (0 to 0-03)    |
| United Republic of Tanzania      | 0-01 (0 to 0-01)    | 0-01 (0 to 0-01)    | 0-01 (0 to 0-02)     | 0-02 (0 to 0-04)     | 0-02 (-0-01 to 0-06) | 0-02 (0 to 0-03)    |
| Zambia                           | *                   | *                   | *                    | *                    | *                    | *                   |
| Zimbabwe                         | *                   | *                   | *                    | *                    | *                    | *                   |
| <b>Region of the Americas</b>    |                     |                     |                      |                      |                      |                     |
| Antigua and Barbuda              | *                   | *                   | *                    | *                    | *                    | *                   |
| Argentina                        | 0-04 (0-01 to 0-06) | 0-04 (0-01 to 0-07) | 0-04 (-0-02 to 0-09) | 0-1 (-0-03 to 0-22)  | 0-1 (-0-07 to 0-29)  | 0-1 (0-02 to 0-18)  |
| Bahamas (The)                    | 0-05 (0-02 to 0-08) | 0-05 (0-01 to 0-08) | 0-05 (-0-02 to 0-11) | 0-1 (-0-03 to 0-23)  | 0-11 (-0-07 to 0-29) | 0-11 (0-03 to 0-19) |
| Barbados                         | 0-05 (0-02 to 0-08) | 0-05 (0-01 to 0-08) | 0-05 (-0-02 to 0-11) | 0-1 (-0-03 to 0-23)  | 0-11 (-0-07 to 0-29) | 0-11 (0-03 to 0-19) |
| Belize                           | 0-04 (0-01 to 0-06) | 0-04 (0-01 to 0-06) | 0-04 (-0-02 to 0-09) | 0-09 (-0-03 to 0-19) | 0-09 (-0-06 to 0-25) | 0-09 (0-02 to 0-16) |
| Bolivia (Plurinational State of) | 0-04 (0-01 to 0-06) | 0-04 (0-01 to 0-06) | 0-04 (-0-02 to 0-09) | 0-09 (-0-03 to 0-19) | 0-09 (-0-06 to 0-25) | 0-09 (0-02 to 0-16) |
| Brazil                           | 0-05 (0-02 to 0-07) | 0-05 (0-01 to 0-08) | 0-05 (-0-02 to 0-1)  | 0-11 (-0-03 to 0-24) | 0-12 (-0-08 to 0-31) | 0-12 (0-03 to 0-2)  |
| Canada                           | 0-03 (0-01 to 0-04) | 0-03 (0-01 to 0-05) | 0-03 (-0-01 to 0-06) | 0-07 (-0-02 to 0-16) | 0-07 (-0-04 to 0-22) | 0-07 (0-02 to 0-13) |
| Chile                            | 0-03 (0-01 to 0-04) | 0-03 (0-01 to 0-05) | 0-03 (-0-01 to 0-06) | 0-07 (-0-02 to 0-16) | 0-07 (-0-04 to 0-2)  | 0-07 (0-02 to 0-13) |
| Colombia                         | 0-04 (0-01 to 0-07) | 0-05 (0-01 to 0-08) | 0-04 (-0-02 to 0-1)  | 0-11 (-0-03 to 0-23) | 0-11 (-0-07 to 0-3)  | 0-11 (0-03 to 0-19) |
| Costa Rica                       | 0-05 (0-02 to 0-08) | 0-05 (0-01 to 0-08) | 0-05 (-0-02 to 0-11) | 0-11 (-0-03 to 0-24) | 0-11 (-0-07 to 0-31) | 0-11 (0-03 to 0-2)  |
| Cuba                             | 0-04 (0-01 to 0-06) | 0-04 (0-01 to 0-07) | 0-04 (-0-02 to 0-09) | 0-09 (-0-03 to 0-2)  | 0-09 (-0-06 to 0-26) | 0-09 (0-02 to 0-17) |
| Dominica                         | *                   | *                   | *                    | *                    | *                    | *                   |
| Dominican Republic (The)         | 0-04 (0-01 to 0-06) | 0-04 (0-01 to 0-07) | 0-04 (-0-02 to 0-09) | 0-1 (-0-03 to 0-21)  | 0-1 (-0-06 to 0-27)  | 0-1 (0-02 to 0-17)  |

|                                    |                     |                     |                      |                      |                      |                     |
|------------------------------------|---------------------|---------------------|----------------------|----------------------|----------------------|---------------------|
| Ecuador                            | 0-03 (0-01 to 0-04) | 0-03 (0-01 to 0-05) | 0-03 (-0-01 to 0-06) | 0-07 (-0-02 to 0-16) | 0-07 (-0-04 to 0-21) | 0-07 (0-02 to 0-13) |
| El Salvador                        | 0-04 (0-01 to 0-06) | 0-04 (0-01 to 0-06) | 0-04 (-0-02 to 0-09) | 0-09 (-0-03 to 0-19) | 0-09 (-0-06 to 0-25) | 0-09 (0-02 to 0-16) |
| Grenada                            | *                   | *                   | *                    | *                    | *                    | *                   |
| Guatemala                          | 0-03 (0-01 to 0-05) | 0-04 (0-01 to 0-07) | 0-03 (-0-02 to 0-08) | 0-09 (-0-03 to 0-2)  | 0-09 (-0-06 to 0-26) | 0-09 (0-02 to 0-17) |
| Guyana                             | 0-04 (0-01 to 0-06) | 0-04 (0-01 to 0-06) | 0-04 (-0-02 to 0-09) | 0-09 (-0-03 to 0-19) | 0-09 (-0-06 to 0-25) | 0-09 (0-02 to 0-16) |
| Haiti                              | 0-04 (0-01 to 0-06) | 0-04 (0-01 to 0-06) | 0-04 (-0-02 to 0-09) | 0-09 (-0-03 to 0-19) | 0-09 (-0-06 to 0-25) | 0-09 (0-02 to 0-16) |
| Honduras                           | 0-04 (0-01 to 0-06) | 0-04 (0-01 to 0-06) | 0-04 (-0-02 to 0-09) | 0-09 (-0-03 to 0-19) | 0-09 (-0-06 to 0-25) | 0-09 (0-02 to 0-16) |
| Jamaica                            | 0-03 (0-01 to 0-05) | 0-03 (0-01 to 0-06) | 0-03 (-0-01 to 0-07) | 0-08 (-0-02 to 0-18) | 0-08 (-0-05 to 0-24) | 0-08 (0-02 to 0-15) |
| Mexico                             | 0-03 (0-01 to 0-05) | 0-03 (0-01 to 0-05) | 0-03 (-0-01 to 0-07) | 0-07 (-0-02 to 0-17) | 0-07 (-0-05 to 0-22) | 0-07 (0-02 to 0-13) |
| Nicaragua                          | 0-04 (0-01 to 0-06) | 0-04 (0-01 to 0-06) | 0-04 (-0-02 to 0-09) | 0-09 (-0-03 to 0-19) | 0-09 (-0-06 to 0-25) | 0-09 (0-02 to 0-16) |
| Panama                             | 0-04 (0-01 to 0-06) | 0-04 (0-01 to 0-06) | 0-04 (-0-02 to 0-09) | 0-09 (-0-03 to 0-19) | 0-09 (-0-06 to 0-25) | 0-09 (0-02 to 0-16) |
| Paraguay                           | 0-03 (0-01 to 0-05) | 0-04 (0-01 to 0-07) | 0-03 (-0-01 to 0-07) | 0-09 (-0-03 to 0-21) | 0-09 (-0-06 to 0-26) | 0-09 (0-02 to 0-17) |
| Peru                               | 0-04 (0-01 to 0-06) | 0-04 (0-01 to 0-06) | 0-04 (-0-02 to 0-09) | 0-09 (-0-03 to 0-19) | 0-09 (-0-06 to 0-25) | 0-09 (0-02 to 0-16) |
| Saint Kitts and Nevis              | *                   | *                   | *                    | *                    | *                    | *                   |
| Saint Lucia                        | 0-04 (0-02 to 0-07) | 0-04 (0-01 to 0-07) | 0-04 (-0-02 to 0-1)  | 0-1 (-0-03 to 0-22)  | 0-1 (-0-06 to 0-28)  | 0-1 (0-02 to 0-18)  |
| Saint Vicent and the Grenadines    | *                   | *                   | *                    | *                    | *                    | *                   |
| Suriname                           | 0-04 (0-01 to 0-07) | 0-05 (0-01 to 0-08) | 0-04 (-0-02 to 0-1)  | 0-11 (-0-03 to 0-23) | 0-11 (-0-07 to 0-3)  | 0-11 (0-03 to 0-19) |
| Trinidad and Tobago                | 0-04 (0-01 to 0-07) | 0-04 (0-01 to 0-07) | 0-04 (-0-02 to 0-1)  | 0-09 (-0-03 to 0-21) | 0-1 (-0-06 to 0-27)  | 0-1 (0-02 to 0-17)  |
| United States of America           | 0-04 (0-01 to 0-07) | 0-04 (0-01 to 0-07) | 0-04 (-0-02 to 0-1)  | 0-1 (-0-03 to 0-22)  | 0-1 (-0-06 to 0-28)  | 0-1 (0-02 to 0-18)  |
| Uruguay                            | 0-02 (0-01 to 0-04) | 0-02 (0-01 to 0-04) | 0-02 (-0-01 to 0-05) | 0-06 (-0-02 to 0-13) | 0-06 (-0-03 to 0-18) | 0-06 (0-01 to 0-11) |
| Venezuela (Bolivarian Republic of) | 0-03 (0-01 to 0-05) | 0-03 (0-01 to 0-06) | 0-03 (-0-01 to 0-07) | 0-08 (-0-02 to 0-18) | 0-08 (-0-05 to 0-23) | 0-08 (0-02 to 0-14) |
| <b>Eastern Mediterran Region</b>   |                     |                     |                      |                      |                      |                     |
| Afghanistan                        | 0-04 (0-01 to 0-06) | 0-04 (0-01 to 0-07) | 0-04 (-0-02 to 0-09) | 0-1 (-0-03 to 0-21)  | 0-1 (-0-06 to 0-27)  | 0-1 (0-02 to 0-18)  |
| Bahrain                            | 0-04 (0-01 to 0-06) | 0-04 (0-01 to 0-07) | 0-04 (-0-02 to 0-09) | 0-1 (-0-03 to 0-21)  | 0-1 (-0-06 to 0-27)  | 0-1 (0-02 to 0-18)  |
| Egypt                              | 0-03 (0-01 to 0-05) | 0-03 (0-01 to 0-06) | 0-03 (-0-02 to 0-08) | 0-08 (-0-02 to 0-18) | 0-08 (-0-05 to 0-23) | 0-08 (0-02 to 0-14) |
| Iran (Islamic Republic of)         | 0-04 (0-01 to 0-06) | 0-04 (0-01 to 0-06) | 0-04 (-0-02 to 0-09) | 0-08 (-0-02 to 0-19) | 0-09 (-0-05 to 0-24) | 0-09 (0-02 to 0-15) |
| Iraq                               | 0-05 (0-02 to 0-09) | 0-05 (0-02 to 0-09) | 0-05 (-0-03 to 0-12) | 0-12 (-0-04 to 0-26) | 0-13 (-0-08 to 0-33) | 0-13 (0-03 to 0-22) |
| Jordan                             | 0-01 (0 to 0-02)    | 0-01 (0 to 0-02)    | 0-01 (-0-01 to 0-03) | 0-03 (-0-01 to 0-08) | 0-03 (-0-02 to 0-1)  | 0-03 (0-01 to 0-06) |
| Kuwait                             | 0-06 (0-02 to 0-1)  | 0-07 (0-02 to 0-11) | 0-06 (-0-03 to 0-14) | 0-15 (-0-05 to 0-32) | 0-16 (-0-11 to 0-39) | 0-16 (0-04 to 0-27) |
| Lebanon                            | 0-03 (0-01 to 0-05) | 0-04 (0-01 to 0-06) | 0-03 (-0-01 to 0-07) | 0-09 (-0-03 to 0-2)  | 0-09 (-0-06 to 0-26) | 0-09 (0-02 to 0-16) |
| Libya                              | 0-04 (0-01 to 0-06) | 0-04 (0-01 to 0-06) | 0-04 (-0-02 to 0-08) | 0-09 (-0-03 to 0-2)  | 0-09 (-0-06 to 0-26) | 0-09 (0-02 to 0-16) |
| Morocco                            | 0-03 (0-01 to 0-04) | 0-03 (0-01 to 0-05) | 0-03 (-0-01 to 0-06) | 0-07 (-0-02 to 0-15) | 0-07 (-0-04 to 0-2)  | 0-07 (0-02 to 0-12) |

|                        |                     |                     |                      |                      |                      |                     |
|------------------------|---------------------|---------------------|----------------------|----------------------|----------------------|---------------------|
| Oman                   | 0-03 (0-01 to 0-06) | 0-03 (0-01 to 0-06) | 0-03 (-0-02 to 0-08) | 0-08 (-0-02 to 0-19) | 0-08 (-0-05 to 0-24) | 0-08 (0-02 to 0-15) |
| Pakistan               | 0-04 (0-01 to 0-06) | 0-04 (0-01 to 0-06) | 0-04 (-0-02 to 0-09) | 0-08 (-0-02 to 0-19) | 0-09 (-0-05 to 0-24) | 0-09 (0-02 to 0-15) |
| Qatar                  | 0-04 (0-01 to 0-07) | 0-04 (0-01 to 0-07) | 0-04 (-0-02 to 0-1)  | 0-09 (-0-03 to 0-2)  | 0-09 (-0-06 to 0-26) | 0-09 (0-02 to 0-17) |
| Saudi Arabia           | 0-06 (0-02 to 0-09) | 0-06 (0-02 to 0-09) | 0-06 (-0-03 to 0-13) | 0-13 (-0-04 to 0-27) | 0-13 (-0-09 to 0-34) | 0-13 (0-03 to 0-22) |
| Somalia                | 0-04 (0-01 to 0-06) | 0-04 (0-01 to 0-07) | 0-04 (-0-02 to 0-09) | 0-1 (-0-03 to 0-21)  | 0-1 (-0-06 to 0-27)  | 0-1 (0-02 to 0-18)  |
| Sudan                  | 0-04 (0-01 to 0-06) | 0-04 (0-01 to 0-07) | 0-04 (-0-02 to 0-09) | 0-1 (-0-03 to 0-21)  | 0-1 (-0-06 to 0-27)  | 0-1 (0-02 to 0-18)  |
| Syrian Arab Republic   | 0-04 (0-01 to 0-06) | 0-04 (0-01 to 0-07) | 0-04 (-0-02 to 0-09) | 0-1 (-0-03 to 0-21)  | 0-1 (-0-06 to 0-27)  | 0-1 (0-02 to 0-18)  |
| Tunisia                | 0-03 (0-01 to 0-05) | 0-03 (0-01 to 0-05) | 0-03 (-0-01 to 0-07) | 0-08 (-0-02 to 0-17) | 0-08 (-0-05 to 0-23) | 0-08 (0-02 to 0-14) |
| United Arab Emirates   | 0-04 (0-01 to 0-07) | 0-04 (0-01 to 0-07) | 0-04 (-0-02 to 0-1)  | 0-1 (-0-03 to 0-22)  | 0-1 (-0-07 to 0-28)  | 0-1 (0-02 to 0-18)  |
| Yemen                  | *                   | *                   | *                    | *                    | *                    | *                   |
| Djibouti               | 0-04 (0-01 to 0-06) | 0-04 (0-01 to 0-07) | 0-04 (-0-02 to 0-09) | 0-1 (-0-03 to 0-21)  | 0-1 (-0-06 to 0-27)  | 0-1 (0-02 to 0-18)  |
| <b>European Region</b> |                     |                     |                      |                      |                      |                     |
| Albania                | 0-03 (0-01 to 0-05) | 0-03 (0-01 to 0-05) | 0-03 (-0-01 to 0-07) | 0-07 (-0-02 to 0-17) | 0-08 (-0-05 to 0-22) | 0-08 (0-02 to 0-14) |
| Andorra                | *                   | *                   | *                    | *                    | *                    | *                   |
| Armenia                | 0-02 (0-01 to 0-03) | 0-02 (0-01 to 0-04) | 0-02 (-0-01 to 0-05) | 0-06 (-0-02 to 0-13) | 0-06 (-0-04 to 0-18) | 0-06 (0-01 to 0-11) |
| Austria                | 0-03 (0-01 to 0-05) | 0-03 (0-01 to 0-05) | 0-03 (-0-01 to 0-07) | 0-08 (-0-02 to 0-17) | 0-08 (-0-05 to 0-22) | 0-08 (0-02 to 0-14) |
| Azerbaijan             | 0-03 (0-01 to 0-05) | 0-03 (0-01 to 0-05) | 0-03 (-0-01 to 0-07) | 0-07 (-0-02 to 0-17) | 0-08 (-0-05 to 0-22) | 0-08 (0-02 to 0-14) |
| Belarus                | 0-01 (0 to 0-02)    | 0-02 (0 to 0-03)    | 0-01 (-0-01 to 0-03) | 0-04 (-0-01 to 0-09) | 0-04 (-0-02 to 0-12) | 0-04 (0-01 to 0-07) |
| Belgium                | 0-04 (0-01 to 0-06) | 0-04 (0-01 to 0-06) | 0-04 (-0-02 to 0-08) | 0-09 (-0-03 to 0-2)  | 0-09 (-0-06 to 0-26) | 0-09 (0-02 to 0-16) |
| Bosnia and Herzegovina | 0-02 (0-01 to 0-04) | 0-03 (0-01 to 0-05) | 0-02 (-0-01 to 0-06) | 0-06 (-0-02 to 0-15) | 0-07 (-0-04 to 0-2)  | 0-07 (0-02 to 0-12) |
| Bulgaria               | 0-04 (0-01 to 0-06) | 0-04 (0-01 to 0-07) | 0-04 (-0-02 to 0-08) | 0-09 (-0-03 to 0-21) | 0-1 (-0-06 to 0-27)  | 0-1 (0-02 to 0-17)  |
| Croatia                | 0-03 (0-01 to 0-05) | 0-03 (0-01 to 0-06) | 0-03 (-0-01 to 0-07) | 0-08 (-0-02 to 0-18) | 0-08 (-0-05 to 0-23) | 0-08 (0-02 to 0-14) |
| Cyprus                 | 0-04 (0-01 to 0-07) | 0-05 (0-01 to 0-08) | 0-04 (-0-02 to 0-1)  | 0-11 (-0-03 to 0-23) | 0-11 (-0-07 to 0-3)  | 0-11 (0-03 to 0-19) |
| Czechia                | 0-03 (0-01 to 0-05) | 0-03 (0-01 to 0-06) | 0-03 (-0-01 to 0-07) | 0-08 (-0-02 to 0-18) | 0-08 (-0-05 to 0-23) | 0-08 (0-02 to 0-14) |
| Denmark                | 0-03 (0-01 to 0-04) | 0-03 (0-01 to 0-05) | 0-03 (-0-01 to 0-06) | 0-07 (-0-02 to 0-16) | 0-07 (-0-04 to 0-21) | 0-07 (0-02 to 0-13) |
| Estonia                | 0-03 (0-01 to 0-05) | 0-03 (0-01 to 0-06) | 0-03 (-0-01 to 0-07) | 0-08 (-0-02 to 0-18) | 0-08 (-0-05 to 0-24) | 0-08 (0-02 to 0-15) |
| Finland                | 0-01 (0 to 0-02)    | 0-02 (0 to 0-03)    | 0-01 (-0-01 to 0-03) | 0-04 (-0-01 to 0-1)  | 0-04 (-0-03 to 0-14) | 0-04 (0-01 to 0-08) |
| France                 | 0-03 (0-01 to 0-05) | 0-03 (0-01 to 0-05) | 0-03 (-0-01 to 0-07) | 0-07 (-0-02 to 0-17) | 0-08 (-0-05 to 0-22) | 0-08 (0-02 to 0-14) |
| Georgia                | 0-02 (0-01 to 0-03) | 0-02 (0-01 to 0-03) | 0-02 (-0-01 to 0-04) | 0-05 (-0-01 to 0-11) | 0-05 (-0-03 to 0-15) | 0-05 (0-01 to 0-09) |
| Germany                | 0-04 (0-01 to 0-06) | 0-04 (0-01 to 0-07) | 0-04 (-0-02 to 0-09) | 0-1 (-0-03 to 0-23)  | 0-11 (-0-07 to 0-29) | 0-11 (0-02 to 0-19) |
| Greece                 | 0-04 (0-01 to 0-06) | 0-04 (0-01 to 0-07) | 0-04 (-0-02 to 0-08) | 0-09 (-0-03 to 0-21) | 0-1 (-0-06 to 0-27)  | 0-1 (0-02 to 0-17)  |
| Hungary                | 0-04 (0-01 to 0-06) | 0-04 (0-01 to 0-07) | 0-04 (-0-02 to 0-09) | 0-09 (-0-03 to 0-21) | 0-1 (-0-06 to 0-27)  | 0-1 (0-02 to 0-17)  |

|                                                            |                     |                     |                      |                      |                      |                     |
|------------------------------------------------------------|---------------------|---------------------|----------------------|----------------------|----------------------|---------------------|
| Iceland                                                    | 0-03 (0-01 to 0-05) | 0-03 (0-01 to 0-05) | 0-03 (-0-01 to 0-07) | 0-07 (-0-02 to 0-17) | 0-08 (-0-05 to 0-22) | 0-08 (0-02 to 0-14) |
| Ireland                                                    | 0-03 (0-01 to 0-05) | 0-03 (0-01 to 0-06) | 0-03 (-0-02 to 0-08) | 0-08 (-0-02 to 0-18) | 0-08 (-0-05 to 0-24) | 0-08 (0-02 to 0-15) |
| Israel                                                     | 0-03 (0-01 to 0-05) | 0-03 (0-01 to 0-05) | 0-03 (-0-01 to 0-07) | 0-07 (-0-02 to 0-17) | 0-08 (-0-05 to 0-22) | 0-08 (0-02 to 0-14) |
| Italy                                                      | 0-04 (0-01 to 0-06) | 0-04 (0-01 to 0-07) | 0-04 (-0-02 to 0-09) | 0-1 (-0-03 to 0-22)  | 0-1 (-0-07 to 0-28)  | 0-1 (0-02 to 0-18)  |
| Kazakhstan                                                 | 0-03 (0-01 to 0-04) | 0-03 (0-01 to 0-05) | 0-03 (-0-01 to 0-06) | 0-07 (-0-02 to 0-16) | 0-07 (-0-04 to 0-21) | 0-07 (0-02 to 0-13) |
| Kyrgyzstan                                                 | 0-01 (0 to 0-02)    | 0-02 (0 to 0-03)    | 0-01 (-0-01 to 0-04) | 0-04 (-0-01 to 0-09) | 0-04 (-0-02 to 0-12) | 0-04 (0-01 to 0-07) |
| Latvia                                                     | 0-03 (0-01 to 0-05) | 0-03 (0-01 to 0-05) | 0-03 (-0-01 to 0-07) | 0-07 (-0-02 to 0-17) | 0-08 (-0-05 to 0-22) | 0-08 (0-02 to 0-14) |
| Lithuania                                                  | 0-03 (0-01 to 0-04) | 0-03 (0-01 to 0-05) | 0-03 (-0-01 to 0-06) | 0-07 (-0-02 to 0-15) | 0-07 (-0-04 to 0-2)  | 0-07 (0-02 to 0-13) |
| Luxembourg                                                 | 0-03 (0-01 to 0-04) | 0-03 (0-01 to 0-05) | 0-03 (-0-01 to 0-06) | 0-07 (-0-02 to 0-16) | 0-07 (-0-04 to 0-21) | 0-07 (0-02 to 0-13) |
| Malta                                                      | 0-04 (0-01 to 0-07) | 0-04 (0-01 to 0-07) | 0-04 (-0-02 to 0-09) | 0-1 (-0-03 to 0-22)  | 0-1 (-0-07 to 0-29)  | 0-1 (0-02 to 0-18)  |
| Monaco                                                     | *                   | *                   | *                    | *                    | *                    | *                   |
| Montenegro                                                 | 0-03 (0-01 to 0-05) | 0-03 (0-01 to 0-05) | 0-03 (-0-01 to 0-07) | 0-07 (-0-02 to 0-17) | 0-08 (-0-05 to 0-22) | 0-08 (0-02 to 0-14) |
| Netherlands                                                | 0-03 (0-01 to 0-04) | 0-03 (0-01 to 0-05) | 0-03 (-0-01 to 0-06) | 0-07 (-0-02 to 0-16) | 0-07 (-0-04 to 0-21) | 0-07 (0-02 to 0-13) |
| North Macedonia                                            | 0-03 (0-01 to 0-05) | 0-03 (0-01 to 0-05) | 0-03 (-0-01 to 0-07) | 0-07 (-0-02 to 0-17) | 0-08 (-0-05 to 0-22) | 0-08 (0-02 to 0-14) |
| Norway                                                     | 0-03 (0-01 to 0-05) | 0-03 (0-01 to 0-06) | 0-03 (-0-01 to 0-07) | 0-08 (-0-02 to 0-18) | 0-08 (-0-05 to 0-23) | 0-08 (0-02 to 0-15) |
| Poland                                                     | 0-03 (0-01 to 0-05) | 0-03 (0-01 to 0-06) | 0-03 (-0-01 to 0-07) | 0-08 (-0-02 to 0-18) | 0-08 (-0-05 to 0-24) | 0-08 (0-02 to 0-15) |
| Portugal                                                   | 0-04 (0-01 to 0-07) | 0-05 (0-01 to 0-08) | 0-04 (-0-02 to 0-1)  | 0-1 (-0-03 to 0-23)  | 0-11 (-0-07 to 0-29) | 0-11 (0-03 to 0-19) |
| Republic of Moldova                                        | 0-01 (0 to 0-02)    | 0-01 (0 to 0-02)    | 0-01 (0 to 0-02)     | 0-03 (-0-01 to 0-07) | 0-03 (-0-02 to 0-1)  | 0-03 (0-01 to 0-06) |
| Romania                                                    | 0-03 (0-01 to 0-05) | 0-04 (0-01 to 0-06) | 0-03 (-0-02 to 0-08) | 0-09 (-0-03 to 0-2)  | 0-09 (-0-06 to 0-25) | 0-09 (0-02 to 0-16) |
| Russian Federation                                         | 0-02 (0-01 to 0-03) | 0-02 (0-01 to 0-03) | 0-02 (-0-01 to 0-04) | 0-04 (-0-01 to 0-11) | 0-05 (-0-03 to 0-14) | 0-05 (0-01 to 0-08) |
| San Marino                                                 | *                   | *                   | *                    | *                    | *                    | *                   |
| Serbia                                                     | 0-04 (0-01 to 0-06) | 0-04 (0-01 to 0-07) | 0-04 (-0-02 to 0-09) | 0-1 (-0-03 to 0-21)  | 0-1 (-0-06 to 0-27)  | 0-1 (0-02 to 0-18)  |
| Slovakia                                                   | 0-03 (0-01 to 0-05) | 0-04 (0-01 to 0-06) | 0-03 (-0-02 to 0-08) | 0-09 (-0-03 to 0-19) | 0-09 (-0-06 to 0-25) | 0-09 (0-02 to 0-16) |
| Slovenia                                                   | 0-03 (0-01 to 0-05) | 0-03 (0-01 to 0-06) | 0-03 (-0-01 to 0-07) | 0-08 (-0-02 to 0-18) | 0-08 (-0-05 to 0-24) | 0-08 (0-02 to 0-15) |
| Spain                                                      | 0-03 (0-01 to 0-04) | 0-03 (0-01 to 0-05) | 0-03 (-0-01 to 0-06) | 0-07 (-0-02 to 0-16) | 0-07 (-0-04 to 0-2)  | 0-07 (0-02 to 0-13) |
| Sweden                                                     | 0-02 (0-01 to 0-04) | 0-02 (0-01 to 0-04) | 0-02 (-0-01 to 0-05) | 0-06 (-0-02 to 0-14) | 0-06 (-0-04 to 0-18) | 0-06 (0-01 to 0-11) |
| Switzerland                                                | 0-02 (0-01 to 0-04) | 0-03 (0-01 to 0-04) | 0-02 (-0-01 to 0-05) | 0-06 (-0-02 to 0-14) | 0-06 (-0-04 to 0-19) | 0-06 (0-01 to 0-11) |
| Tajikistan                                                 | 0-03 (0-01 to 0-05) | 0-03 (0-01 to 0-05) | 0-03 (-0-02 to 0-08) | 0-07 (-0-02 to 0-17) | 0-08 (-0-05 to 0-22) | 0-08 (0-02 to 0-14) |
| Turkey                                                     | 0-03 (0-01 to 0-05) | 0-03 (0-01 to 0-05) | 0-03 (-0-02 to 0-08) | 0-08 (-0-02 to 0-17) | 0-08 (-0-05 to 0-23) | 0-08 (0-02 to 0-14) |
| Turkmenistan                                               | 0-03 (0-01 to 0-05) | 0-03 (0-01 to 0-05) | 0-03 (-0-01 to 0-07) | 0-07 (-0-02 to 0-17) | 0-08 (-0-05 to 0-22) | 0-08 (0-02 to 0-14) |
| Ukraine                                                    | 0-02 (0-01 to 0-03) | 0-02 (0-01 to 0-04) | 0-02 (-0-01 to 0-04) | 0-05 (-0-01 to 0-12) | 0-05 (-0-03 to 0-16) | 0-05 (0-01 to 0-1)  |
| United Kingdom of Great Britain and Northern Ireland (the) | 0-03 (0-01 to 0-06) | 0-04 (0-01 to 0-06) | 0-03 (-0-02 to 0-08) | 0-09 (-0-03 to 0-2)  | 0-09 (-0-06 to 0-26) | 0-09 (0-02 to 0-16) |

|                                       |                     |                     |                      |                      |                      |                     |
|---------------------------------------|---------------------|---------------------|----------------------|----------------------|----------------------|---------------------|
| Uzbekistan                            | 0-02 (0-01 to 0-04) | 0-02 (0-01 to 0-04) | 0-02 (-0-01 to 0-05) | 0-05 (-0-01 to 0-12) | 0-05 (-0-03 to 0-15) | 0-05 (0-01 to 0-09) |
| <b>South-East Asian Region</b>        |                     |                     |                      |                      |                      |                     |
| Bangladesh                            | 0-03 (0-01 to 0-06) | 0-03 (0-01 to 0-05) | 0-03 (-0-02 to 0-08) | 0-07 (-0-02 to 0-16) | 0-07 (-0-04 to 0-21) | 0-07 (0-02 to 0-13) |
| Bhutan                                | *                   | *                   | *                    | *                    | *                    | *                   |
| Democratic People's Republic of Korea | 0-03 (0-01 to 0-05) | 0-02 (0-01 to 0-04) | 0-03 (-0-02 to 0-08) | 0-06 (-0-02 to 0-13) | 0-06 (-0-03 to 0-18) | 0-06 (0-01 to 0-11) |
| India                                 | 0-04 (0-01 to 0-06) | 0-04 (0-01 to 0-06) | 0-04 (-0-02 to 0-09) | 0-08 (-0-02 to 0-19) | 0-09 (-0-05 to 0-25) | 0-09 (0-02 to 0-16) |
| Indonesia                             | 0-02 (0-01 to 0-03) | 0-02 (0-01 to 0-04) | 0-02 (-0-01 to 0-05) | 0-06 (-0-02 to 0-13) | 0-06 (-0-04 to 0-18) | 0-06 (0-01 to 0-11) |
| Maldives                              | 0-03 (0-01 to 0-05) | 0-03 (0-01 to 0-05) | 0-03 (-0-01 to 0-07) | *                    | *                    | *                   |
| Myanmar                               | 0-01 (0 to 0-02)    | 0-01 (0 to 0-02)    | 0-01 (-0-01 to 0-03) | 0-03 (-0-01 to 0-07) | 0-03 (-0-02 to 0-09) | 0-03 (0-01 to 0-05) |
| Nepal                                 | 0-01 (0 to 0-02)    | 0-01 (0 to 0-02)    | 0-01 (-0-01 to 0-03) | 0-03 (-0-01 to 0-08) | 0-04 (-0-02 to 0-11) | 0-04 (0-01 to 0-07) |
| Sri Lanka                             | 0-03 (0-01 to 0-05) | 0-03 (0-01 to 0-05) | 0-03 (-0-01 to 0-07) | 0-07 (-0-02 to 0-17) | 0-07 (-0-05 to 0-22) | 0-07 (0-02 to 0-13) |
| Thailand                              | 0-02 (0-01 to 0-04) | 0-03 (0-01 to 0-04) | 0-02 (-0-01 to 0-06) | 0-06 (-0-02 to 0-15) | 0-06 (-0-04 to 0-19) | 0-06 (0-01 to 0-12) |
| Timor-Leste                           | 0-02 (0-01 to 0-04) | 0-02 (0-01 to 0-03) | 0-02 (-0-01 to 0-05) | 0-05 (-0-01 to 0-11) | 0-05 (-0-03 to 0-15) | 0-05 (0-01 to 0-09) |
| <b>Western Pacific Region</b>         |                     |                     |                      |                      |                      |                     |
| Australia                             | 0-03 (0-01 to 0-05) | 0-03 (0-01 to 0-04) | 0-03 (-0-01 to 0-07) | 0-08 (-0-02 to 0-17) | 0-08 (-0-05 to 0-23) | 0-08 (0-02 to 0-14) |
| Brunei Darussalam                     | 0-03 (0-01 to 0-05) | 0-03 (0-01 to 0-04) | 0-03 (-0-01 to 0-07) | 0-07 (-0-02 to 0-16) | 0-07 (-0-04 to 0-21) | 0-07 (0-02 to 0-13) |
| Cambodia                              | 0-01 (0 to 0-02)    | 0-01 (0 to 0-02)    | 0-01 (0 to 0-02)     | 0-03 (-0-01 to 0-07) | 0-03 (-0-02 to 0-09) | 0-03 (0-01 to 0-05) |
| China                                 | 0-01 (0 to 0-02)    | 0-02 (0 to 0-02)    | 0-01 (0 to 0-03)     | 0-04 (-0-01 to 0-09) | 0-04 (-0-02 to 0-12) | 0-04 (0-01 to 0-07) |
| Cook Islands                          | *                   | *                   | *                    | *                    | *                    | *                   |
| Fiji                                  | *                   | 0-02 (0-01 to 0-03) | 0-02 (-0-01 to 0-05) | 0-04 (-0-01 to 0-11) | 0-05 (-0-03 to 0-14) | 0-05 (0-01 to 0-09) |
| Japan                                 | 0-03 (0-01 to 0-05) | 0-04 (0-01 to 0-05) | 0-03 (-0-02 to 0-08) | 0-09 (-0-03 to 0-2)  | 0-09 (-0-06 to 0-25) | 0-09 (0-02 to 0-16) |
| Kiribati                              | *                   | *                   | *                    | *                    | *                    | *                   |
| Lao People's Democratic Republic      | 0-02 (0-01 to 0-03) | 0-02 (0 to 0-02)    | 0-02 (-0-01 to 0-04) | 0-04 (-0-01 to 0-1)  | 0-04 (-0-03 to 0-14) | 0-04 (0-01 to 0-08) |
| Malaysia                              | 0-04 (0-01 to 0-06) | 0-04 (0-01 to 0-05) | 0-04 (-0-02 to 0-09) | 0-09 (-0-03 to 0-21) | 0-1 (-0-06 to 0-27)  | 0-1 (0-02 to 0-17)  |
| Marshall Islands                      | *                   | *                   | *                    | *                    | *                    | *                   |
| Micronesia (Federated States of)      | 0-04 (0-01 to 0-06) | 0-04 (0-01 to 0-05) | 0-04 (-0-02 to 0-08) | 0-09 (-0-03 to 0-2)  | 0-09 (-0-06 to 0-26) | 0-09 (0-02 to 0-17) |
| Mongolia                              | 0-02 (0-01 to 0-03) | 0-02 (0-01 to 0-03) | 0-02 (-0-01 to 0-04) | 0-05 (-0-01 to 0-11) | 0-05 (-0-03 to 0-15) | 0-05 (0-01 to 0-09) |
| Nauru                                 | *                   | *                   | *                    | *                    | *                    | *                   |
| New Zealand                           | 0-04 (0-01 to 0-06) | 0-04 (0-01 to 0-06) | 0-04 (-0-02 to 0-09) | 0-1 (-0-03 to 0-23)  | 0-11 (-0-07 to 0-29) | 0-11 (0-02 to 0-19) |
| Niue                                  | *                   | *                   | *                    | *                    | *                    | *                   |
| Palau                                 | *                   | *                   | *                    | *                    | *                    | *                   |
| Papua New Guinea                      | 0-02 (0-01 to 0-03) | 0-02 (0 to 0-02)    | 0-02 (-0-01 to 0-04) | 0-04 (-0-01 to 0-09) | 0-04 (-0-02 to 0-12) | 0-04 (0-01 to 0-07) |



|                   |                     |                     |                      |                      |                      |                     |
|-------------------|---------------------|---------------------|----------------------|----------------------|----------------------|---------------------|
| Philippines       | 0.04 (0.01 to 0.07) | 0.04 (0.01 to 0.06) | 0.04 (-0.02 to 0.1)  | 0.1 (-0.03 to 0.22)  | 0.1 (-0.06 to 0.28)  | 0.1 (0.02 to 0.18)  |
| Republic of Korea | 0.04 (0.01 to 0.06) | 0.04 (0.01 to 0.05) | 0.04 (-0.02 to 0.08) | 0.09 (-0.03 to 0.2)  | 0.09 (-0.06 to 0.25) | 0.09 (0.02 to 0.16) |
| Samoa             | 0.02 (0.01 to 0.03) | 0.01 (0 to 0.02)    | 0.02 (-0.01 to 0.04) | 0.03 (-0.01 to 0.08) | 0.03 (-0.02 to 0.11) | 0.03 (0.01 to 0.06) |
| Singapore         | 0.03 (0.01 to 0.05) | 0.04 (0.01 to 0.05) | 0.03 (-0.02 to 0.08) | 0.09 (-0.03 to 0.2)  | 0.09 (-0.06 to 0.26) | 0.09 (0.02 to 0.16) |
| Solomon Islands   | 0.02 (0.01 to 0.03) | 0.02 (0.01 to 0.03) | 0.02 (-0.01 to 0.05) | 0.05 (-0.01 to 0.11) | 0.05 (-0.03 to 0.15) | *                   |
| Tonga             | *                   | *                   | *                    | *                    | *                    | *                   |
| Tuvalu            | *                   | *                   | *                    | *                    | *                    | *                   |
| Vanuatu           | 0.01 (0 to 0.01)    | 0.01 (0 to 0.01)    | 0.01 (0 to 0.02)     | 0.02 (-0.01 to 0.05) | *                    | *                   |
| Viet Nam          | 0.03 (0.01 to 0.04) | 0.03 (0.01 to 0.04) | 0.03 (-0.01 to 0.06) | 0.06 (-0.02 to 0.15) | 0.07 (-0.04 to 0.2)  | 0.07 (0.02 to 0.12) |

\*No data available

(continued from previous table)

| African Region                   | Bladder cancer       | Stroke              | Coronary Heart Disease | Type 2 diabetes     |
|----------------------------------|----------------------|---------------------|------------------------|---------------------|
| Algeria                          | 0.03 (-0.02 to 0.08) | 0.06 (0.03 to 0.09) | 0.06 (0.04 to 0.08)    | 0.05 (0.04 to 0.07) |
| Angola                           | 0.01 (-0.01 to 0.04) | 0.03 (0.02 to 0.05) | 0.03 (0.02 to 0.05)    | 0.03 (0.02 to 0.04) |
| Benin                            | 0.01 (-0.01 to 0.04) | 0.03 (0.01 to 0.04) | 0.03 (0.02 to 0.04)    | 0.03 (0.02 to 0.04) |
| Botswana                         | 0.02 (-0.02 to 0.05) | 0.04 (0.02 to 0.06) | 0.04 (0.03 to 0.05)    | 0.04 (0.02 to 0.05) |
| Burkina Faso                     | 0.02 (-0.01 to 0.05) | 0.04 (0.02 to 0.05) | 0.04 (0.03 to 0.05)    | 0.03 (0.02 to 0.04) |
| Burundi                          | 0.01 (-0.01 to 0.04) | 0.03 (0.02 to 0.05) | 0.03 (0.02 to 0.05)    | 0.03 (0.02 to 0.04) |
| Cabo Verde                       | 0.02 (-0.01 to 0.05) | 0.04 (0.02 to 0.05) | 0.04 (0.02 to 0.05)    | 0.03 (0.02 to 0.04) |
| Cameroon                         | 0.02 (-0.02 to 0.07) | 0.05 (0.03 to 0.07) | 0.05 (0.04 to 0.07)    | 0.05 (0.03 to 0.06) |
| Central Africa Republic          | 0.01 (-0.01 to 0.03) | 0.03 (0.01 to 0.04) | 0.03 (0.02 to 0.04)    | 0.02 (0.02 to 0.03) |
| Chad                             | 0.02 (-0.02 to 0.06) | 0.04 (0.02 to 0.06) | 0.04 (0.03 to 0.06)    | 0.04 (0.02 to 0.05) |
| Comoros (The)                    | 0.01 (-0.01 to 0.03) | 0.03 (0.01 to 0.04) | 0.03 (0.02 to 0.04)    | 0.02 (0.02 to 0.03) |
| Congo                            | 0.02 (-0.02 to 0.07) | 0.05 (0.02 to 0.07) | 0.05 (0.04 to 0.07)    | 0.05 (0.03 to 0.06) |
| Côte d'Ivoire                    | 0.03 (-0.02 to 0.08) | 0.06 (0.03 to 0.08) | 0.06 (0.04 to 0.08)    | 0.05 (0.04 to 0.07) |
| Democratic Republic of the Congo | 0.02 (-0.02 to 0.06) | 0.04 (0.02 to 0.06) | 0.04 (0.03 to 0.06)    | 0.04 (0.03 to 0.05) |
| Equatorial Guinea                | 0.01 (-0.01 to 0.04) | 0.03 (0.02 to 0.05) | 0.03 (0.02 to 0.05)    | 0.03 (0.02 to 0.04) |
| Eritrea                          | 0.02 (-0.02 to 0.05) | 0.04 (0.02 to 0.06) | 0.04 (0.03 to 0.06)    | 0.04 (0.02 to 0.05) |
| Eswatini                         | 0.02 (-0.02 to 0.07) | 0.05 (0.02 to 0.07) | 0.05 (0.04 to 0.07)    | 0.05 (0.03 to 0.06) |
| Ethiopia                         | 0.01 (-0.01 to 0.04) | 0.03 (0.01 to 0.04) | 0.03 (0.02 to 0.04)    | 0.02 (0.02 to 0.03) |
| Gabon                            | 0.02 (-0.02 to 0.06) | 0.05 (0.02 to 0.07) | 0.05 (0.03 to 0.06)    | 0.04 (0.03 to 0.05) |

|                               |                      |                     |                     |                     |
|-------------------------------|----------------------|---------------------|---------------------|---------------------|
| Ghana                         | 0-02 (-0-02 to 0-05) | 0-04 (0-02 to 0-06) | 0-04 (0-03 to 0-05) | 0-04 (0-02 to 0-05) |
| Guinea                        | 0-01 (-0-01 to 0-03) | 0-03 (0-01 to 0-04) | 0-03 (0-02 to 0-04) | 0-02 (0-02 to 0-03) |
| Guinea-Bissau                 | 0-01 (-0-01 to 0-04) | 0-03 (0-02 to 0-05) | 0-03 (0-02 to 0-05) | 0-03 (0-02 to 0-04) |
| Kenya                         | 0-01 (-0-01 to 0-04) | 0-03 (0-01 to 0-04) | 0-03 (0-02 to 0-04) | 0-03 (0-02 to 0-03) |
| Lesotho                       | 0-01 (0 to 0-02)     | 0-01 (0-01 to 0-02) | 0-01 (0-01 to 0-02) | 0-01 (0-01 to 0-01) |
| Liberia                       | 0-02 (-0-02 to 0-06) | 0-05 (0-02 to 0-07) | 0-05 (0-03 to 0-06) | 0-04 (0-03 to 0-05) |
| Madagascar                    | 0-01 (-0-01 to 0-04) | 0-03 (0-02 to 0-05) | 0-03 (0-02 to 0-04) | 0-03 (0-02 to 0-04) |
| Malawi                        | 0-01 (-0-01 to 0-04) | 0-03 (0-01 to 0-04) | 0-03 (0-02 to 0-04) | 0-03 (0-02 to 0-03) |
| Mali                          | 0-03 (-0-03 to 0-09) | 0-07 (0-04 to 0-1)  | 0-07 (0-05 to 0-1)  | 0-06 (0-04 to 0-09) |
| Mauritania                    | 0-03 (-0-03 to 0-09) | 0-07 (0-04 to 0-1)  | 0-07 (0-05 to 0-1)  | 0-07 (0-04 to 0-09) |
| Mauritius                     | 0-02 (-0-02 to 0-07) | 0-05 (0-03 to 0-08) | 0-05 (0-04 to 0-07) | 0-05 (0-03 to 0-06) |
| Mozambique                    | 0 (0 to 0-01)        | 0-01 (0-01 to 0-02) | 0-01 (0-01 to 0-01) | 0-01 (0-01 to 0-01) |
| Namibia                       | 0-03 (-0-02 to 0-08) | 0-06 (0-03 to 0-09) | 0-06 (0-04 to 0-08) | 0-05 (0-04 to 0-07) |
| Niger                         | 0-02 (-0-02 to 0-05) | 0-04 (0-02 to 0-06) | 0-04 (0-03 to 0-06) | 0-04 (0-02 to 0-05) |
| Nigeria                       | 0-02 (-0-02 to 0-06) | 0-05 (0-02 to 0-07) | 0-05 (0-03 to 0-07) | 0-04 (0-03 to 0-06) |
| Rwanda                        | 0-01 (-0-01 to 0-04) | 0-03 (0-01 to 0-04) | 0-03 (0-02 to 0-04) | 0-02 (0-02 to 0-03) |
| Sao Tome and Principe         | 0-01 (-0-01 to 0-04) | 0-03 (0-01 to 0-04) | 0-03 (0-02 to 0-04) | 0-03 (0-02 to 0-03) |
| Senegal                       | 0-02 (-0-02 to 0-05) | 0-04 (0-02 to 0-06) | 0-04 (0-03 to 0-06) | 0-04 (0-02 to 0-05) |
| Seychelles                    | *                    | 0-03 (0-02 to 0-05) | 0-03 (0-02 to 0-05) | 0-03 (0-02 to 0-04) |
| Sierra Leone                  | 0-01 (-0-01 to 0-03) | 0-03 (0-01 to 0-04) | 0-03 (0-02 to 0-04) | 0-02 (0-02 to 0-03) |
| South Africa                  | 0-03 (-0-03 to 0-09) | 0-07 (0-03 to 0-1)  | 0-07 (0-05 to 0-09) | 0-06 (0-04 to 0-08) |
| South Sudan                   | 0-01 (-0-01 to 0-04) | 0-03 (0-02 to 0-05) | 0-03 (0-02 to 0-05) | 0-03 (0-02 to 0-04) |
| the Gambia                    | 0-02 (-0-01 to 0-05) | 0-04 (0-02 to 0-06) | 0-04 (0-03 to 0-05) | 0-03 (0-02 to 0-05) |
| Togo                          | 0-01 (-0-01 to 0-02) | 0-02 (0-01 to 0-03) | 0-02 (0-01 to 0-02) | 0-02 (0-01 to 0-02) |
| Uganda                        | 0 (0 to 0-01)        | 0-01 (0 to 0-02)    | 0-01 (0-01 to 0-01) | 0-01 (0-01 to 0-01) |
| United Republic of Tanzania   | 0-01 (0 to 0-02)     | 0-01 (0-01 to 0-02) | 0-01 (0-01 to 0-02) | 0-01 (0-01 to 0-01) |
| Zambia                        | *                    | 0-04 (0-02 to 0-06) | 0-04 (0-03 to 0-05) | 0-04 (0-02 to 0-05) |
| Zimbabwe                      | *                    | 0-05 (0-02 to 0-07) | 0-05 (0-03 to 0-07) | 0-04 (0-03 to 0-06) |
| <b>Region of the Americas</b> |                      |                     |                     |                     |
| Antigua and Barbuda           | *                    | 0-06 (0-03 to 0-09) | 0-06 (0-04 to 0-08) | 0-06 (0-04 to 0-07) |
| Argentina                     | 0-03 (-0-03 to 0-09) | 0-07 (0-04 to 0-1)  | 0-07 (0-05 to 0-1)  | 0-07 (0-04 to 0-09) |
| Bahamas (The)                 | 0-03 (-0-03 to 0-1)  | 0-08 (0-04 to 0-11) | 0-08 (0-05 to 0-1)  | 0-07 (0-05 to 0-09) |

|                                    |                      |                     |                     |                     |
|------------------------------------|----------------------|---------------------|---------------------|---------------------|
| Barbados                           | 0.03 (-0.03 to 0.1)  | 0.08 (0.04 to 0.11) | 0.08 (0.05 to 0.1)  | 0.07 (0.05 to 0.09) |
| Belize                             | *                    | 0.06 (0.03 to 0.09) | 0.06 (0.04 to 0.08) | 0.06 (0.04 to 0.07) |
| Bolivia (Plurinational State of)   | 0.03 (-0.03 to 0.08) | 0.06 (0.03 to 0.09) | 0.06 (0.04 to 0.08) | 0.06 (0.04 to 0.07) |
| Brazil                             | 0.04 (-0.03 to 0.11) | 0.08 (0.04 to 0.12) | 0.08 (0.06 to 0.11) | 0.07 (0.05 to 0.1)  |
| Canada                             | 0.02 (-0.02 to 0.07) | 0.05 (0.03 to 0.07) | 0.05 (0.04 to 0.07) | 0.05 (0.03 to 0.06) |
| Chile                              | 0.02 (-0.02 to 0.06) | 0.05 (0.02 to 0.07) | 0.05 (0.03 to 0.06) | 0.04 (0.03 to 0.06) |
| Colombia                           | 0.03 (-0.03 to 0.1)  | 0.08 (0.04 to 0.11) | 0.08 (0.05 to 0.1)  | 0.07 (0.05 to 0.09) |
| Costa Rica                         | 0.04 (-0.03 to 0.1)  | 0.08 (0.04 to 0.11) | 0.08 (0.06 to 0.11) | 0.07 (0.05 to 0.1)  |
| Cuba                               | 0.03 (-0.03 to 0.08) | 0.07 (0.03 to 0.09) | 0.07 (0.05 to 0.09) | 0.06 (0.04 to 0.08) |
| Dominica                           | *                    | 0.08 (0.04 to 0.11) | 0.08 (0.05 to 0.1)  | 0.07 (0.05 to 0.09) |
| Dominican Republic (The)           | 0.03 (-0.03 to 0.09) | 0.07 (0.03 to 0.1)  | 0.07 (0.05 to 0.09) | 0.06 (0.04 to 0.08) |
| Ecuador                            | 0.02 (-0.02 to 0.06) | 0.05 (0.02 to 0.07) | 0.05 (0.03 to 0.07) | 0.04 (0.03 to 0.06) |
| El Salvador                        | 0.03 (-0.03 to 0.08) | 0.06 (0.03 to 0.09) | 0.06 (0.04 to 0.08) | 0.06 (0.04 to 0.07) |
| Grenada                            | *                    | 0.05 (0.03 to 0.07) | 0.05 (0.04 to 0.07) | 0.05 (0.03 to 0.06) |
| Guatemala                          | 0.03 (-0.03 to 0.08) | 0.07 (0.03 to 0.09) | 0.07 (0.05 to 0.09) | 0.06 (0.04 to 0.08) |
| Guyana                             | 0.03 (-0.03 to 0.08) | 0.06 (0.03 to 0.09) | 0.06 (0.04 to 0.08) | 0.06 (0.04 to 0.07) |
| Haiti                              | 0.03 (-0.03 to 0.08) | 0.06 (0.03 to 0.09) | 0.06 (0.04 to 0.08) | 0.06 (0.04 to 0.07) |
| Honduras                           | 0.03 (-0.03 to 0.08) | 0.06 (0.03 to 0.09) | 0.06 (0.04 to 0.08) | 0.06 (0.04 to 0.07) |
| Jamaica                            | 0.03 (-0.02 to 0.08) | 0.06 (0.03 to 0.08) | 0.06 (0.04 to 0.08) | 0.05 (0.03 to 0.07) |
| Mexico                             | 0.02 (-0.02 to 0.07) | 0.05 (0.03 to 0.07) | 0.05 (0.04 to 0.07) | 0.05 (0.03 to 0.06) |
| Nicaragua                          | 0.03 (-0.03 to 0.08) | 0.06 (0.03 to 0.09) | 0.06 (0.04 to 0.08) | 0.06 (0.04 to 0.07) |
| Panama                             | 0.03 (-0.03 to 0.08) | 0.06 (0.03 to 0.09) | 0.06 (0.04 to 0.08) | 0.06 (0.04 to 0.07) |
| Paraguay                           | 0.03 (-0.03 to 0.09) | 0.07 (0.03 to 0.09) | 0.07 (0.05 to 0.09) | 0.06 (0.04 to 0.08) |
| Peru                               | 0.03 (-0.03 to 0.08) | 0.06 (0.03 to 0.09) | 0.06 (0.04 to 0.08) | 0.06 (0.04 to 0.07) |
| Saint Kitts and Nevis              | *                    | 0.05 (0.03 to 0.08) | 0.06 (0.04 to 0.08) | 0.05 (0.04 to 0.07) |
| Saint Lucia                        | 0.03 (-0.03 to 0.09) | 0.07 (0.03 to 0.1)  | 0.07 (0.05 to 0.09) | 0.06 (0.04 to 0.08) |
| Saint Vicent and the Grenadines    | *                    | 0.06 (0.03 to 0.09) | 0.06 (0.04 to 0.08) | 0.06 (0.04 to 0.07) |
| Suriname                           | 0.03 (-0.03 to 0.1)  | 0.08 (0.04 to 0.11) | 0.08 (0.05 to 0.1)  | 0.07 (0.05 to 0.09) |
| Trinidad and Tobago                | 0.03 (-0.03 to 0.09) | 0.07 (0.03 to 0.1)  | 0.07 (0.05 to 0.09) | 0.06 (0.04 to 0.08) |
| United States of America           | 0.03 (-0.03 to 0.09) | 0.07 (0.03 to 0.1)  | 0.07 (0.05 to 0.09) | 0.06 (0.04 to 0.08) |
| Uruguay                            | 0.02 (-0.02 to 0.05) | 0.04 (0.02 to 0.06) | 0.04 (0.03 to 0.06) | 0.04 (0.02 to 0.05) |
| Venezuela (Bolivarian Republic of) | 0.02 (-0.02 to 0.07) | 0.06 (0.03 to 0.08) | 0.06 (0.04 to 0.08) | 0.05 (0.03 to 0.07) |

| <b>Eastern Mediterran Region</b> |                      |                     |                     |                     |
|----------------------------------|----------------------|---------------------|---------------------|---------------------|
| Afghanistan                      | 0-03 (-0-03 to 0-09) | 0-07 (0-03 to 0-1)  | 0-07 (0-05 to 0-09) | 0-06 (0-04 to 0-08) |
| Bahrain                          | 0-03 (-0-03 to 0-09) | 0-07 (0-03 to 0-1)  | 0-07 (0-05 to 0-09) | 0-06 (0-04 to 0-08) |
| Egypt                            | 0-02 (-0-02 to 0-07) | 0-06 (0-03 to 0-08) | 0-06 (0-04 to 0-07) | 0-05 (0-03 to 0-07) |
| Iran (Islamic Republic of)       | 0-03 (-0-02 to 0-08) | 0-06 (0-03 to 0-09) | 0-06 (0-04 to 0-08) | 0-05 (0-04 to 0-07) |
| Iraq                             | 0-04 (-0-04 to 0-12) | 0-09 (0-04 to 0-13) | 0-09 (0-06 to 0-12) | 0-08 (0-05 to 0-11) |
| Jordan                           | 0-01 (-0-01 to 0-03) | 0-02 (0-01 to 0-03) | 0-02 (0-02 to 0-03) | 0-02 (0-01 to 0-03) |
| Kuwait                           | 0-05 (-0-05 to 0-14) | 0-11 (0-06 to 0-16) | 0-11 (0-08 to 0-15) | 0-1 (0-07 to 0-13)  |
| Lebanon                          | 0-03 (-0-03 to 0-08) | 0-06 (0-03 to 0-09) | 0-06 (0-05 to 0-09) | 0-06 (0-04 to 0-08) |
| Libya                            | 0-03 (-0-03 to 0-08) | 0-06 (0-03 to 0-09) | 0-06 (0-05 to 0-09) | 0-06 (0-04 to 0-08) |
| Morocco                          | 0-02 (-0-02 to 0-06) | 0-05 (0-02 to 0-07) | 0-05 (0-03 to 0-06) | 0-04 (0-03 to 0-06) |
| Oman                             | 0-03 (-0-02 to 0-08) | 0-06 (0-03 to 0-08) | 0-06 (0-04 to 0-08) | 0-05 (0-03 to 0-07) |
| Pakistan                         | 0-03 (-0-02 to 0-08) | 0-06 (0-03 to 0-09) | 0-06 (0-04 to 0-08) | 0-05 (0-04 to 0-07) |
| Qatar                            | 0-03 (-0-03 to 0-08) | 0-07 (0-03 to 0-09) | 0-07 (0-05 to 0-09) | 0-06 (0-04 to 0-08) |
| Saudi Arabia                     | 0-04 (-0-04 to 0-12) | 0-09 (0-05 to 0-13) | 0-09 (0-06 to 0-12) | 0-08 (0-06 to 0-11) |
| Somalia                          | 0-03 (-0-03 to 0-09) | 0-07 (0-03 to 0-1)  | 0-07 (0-05 to 0-09) | 0-06 (0-04 to 0-08) |
| Sudan                            | 0-03 (-0-03 to 0-09) | 0-07 (0-03 to 0-1)  | 0-07 (0-05 to 0-09) | 0-06 (0-04 to 0-08) |
| Syrian Arab Republic             | 0-03 (-0-03 to 0-09) | 0-07 (0-03 to 0-1)  | 0-07 (0-05 to 0-09) | 0-06 (0-04 to 0-08) |
| Tunisia                          | 0-02 (-0-02 to 0-07) | 0-05 (0-03 to 0-08) | 0-05 (0-04 to 0-07) | 0-05 (0-03 to 0-07) |
| United Arab Emirates             | 0-03 (-0-03 to 0-09) | 0-07 (0-04 to 0-1)  | 0-07 (0-05 to 0-1)  | 0-07 (0-04 to 0-09) |
| Yemen                            | *                    | 0-07 (0-03 to 0-1)  | 0-07 (0-05 to 0-09) | 0-06 (0-04 to 0-08) |
| Djibouti                         | 0-03 (-0-03 to 0-09) | 0-07 (0-03 to 0-1)  | 0-07 (0-05 to 0-09) | 0-06 (0-04 to 0-08) |
| <b>European Region</b>           |                      |                     |                     |                     |
| Albania                          | 0-07 (-0-02 to 0-07) | 0-05 (0-03 to 0-08) | 0-05 (0-04 to 0-07) | 0-05 (0-03 to 0-06) |
| Andorra                          | *                    | 0-07 (0-03 to 0-1)  | 0-07 (0-05 to 0-09) | 0-06 (0-04 to 0-08) |
| Armenia                          | 0-05 (-0-02 to 0-05) | 0-04 (0-02 to 0-06) | 0-04 (0-03 to 0-06) | 0-04 (0-02 to 0-05) |
| Austria                          | 0-07 (-0-02 to 0-07) | 0-05 (0-03 to 0-08) | 0-05 (0-04 to 0-07) | 0-05 (0-03 to 0-06) |
| Azerbaijan                       | 0-07 (-0-02 to 0-07) | 0-05 (0-03 to 0-08) | 0-05 (0-04 to 0-07) | 0-05 (0-03 to 0-06) |
| Belarus                          | 0-03 (-0-01 to 0-03) | 0-03 (0-01 to 0-04) | 0-03 (0-02 to 0-04) | 0-02 (0-02 to 0-03) |
| Belgium                          | 0-08 (-0-03 to 0-08) | 0-06 (0-03 to 0-09) | 0-06 (0-04 to 0-08) | 0-06 (0-04 to 0-08) |
| Bosnia and Herzegovina           | 0-06 (-0-02 to 0-06) | 0-05 (0-02 to 0-07) | 0-05 (0-03 to 0-06) | 0-04 (0-03 to 0-06) |
| Bulgaria                         | 0-09 (-0-03 to 0-09) | 0-07 (0-03 to 0-1)  | 0-07 (0-05 to 0-09) | 0-06 (0-04 to 0-08) |

|                     |                      |                     |                     |                     |
|---------------------|----------------------|---------------------|---------------------|---------------------|
| Croatia             | 0-07 (-0-02 to 0-07) | 0-06 (0-03 to 0-08) | 0-06 (0-04 to 0-07) | 0-05 (0-03 to 0-07) |
| Cyprus              | 0-1 (-0-03 to 0-1)   | 0-08 (0-04 to 0-11) | 0-08 (0-05 to 0-1)  | 0-07 (0-05 to 0-09) |
| Czechia             | 0-07 (-0-02 to 0-07) | 0-06 (0-03 to 0-08) | 0-06 (0-04 to 0-07) | 0-05 (0-03 to 0-07) |
| Denmark             | 0-07 (-0-02 to 0-07) | 0-05 (0-03 to 0-07) | 0-05 (0-04 to 0-07) | 0-05 (0-03 to 0-06) |
| Estonia             | 0-07 (-0-02 to 0-07) | 0-06 (0-03 to 0-08) | 0-06 (0-04 to 0-08) | 0-05 (0-03 to 0-07) |
| Finland             | 0-04 (-0-01 to 0-04) | 0-03 (0-01 to 0-04) | 0-03 (0-02 to 0-04) | 0-03 (0-02 to 0-04) |
| France              | 0-07 (-0-02 to 0-07) | 0-05 (0-03 to 0-08) | 0-05 (0-04 to 0-07) | 0-05 (0-03 to 0-06) |
| Georgia             | 0-04 (-0-01 to 0-04) | 0-03 (0-02 to 0-05) | 0-03 (0-02 to 0-04) | 0-03 (0-02 to 0-04) |
| Germany             | 0-1 (-0-03 to 0-1)   | 0-07 (0-04 to 0-11) | 0-07 (0-05 to 0-1)  | 0-07 (0-04 to 0-09) |
| Greece              | 0-09 (-0-03 to 0-09) | 0-07 (0-03 to 0-1)  | 0-07 (0-05 to 0-09) | 0-06 (0-04 to 0-08) |
| Hungary             | 0-09 (-0-03 to 0-09) | 0-07 (0-03 to 0-1)  | 0-07 (0-05 to 0-09) | 0-06 (0-04 to 0-08) |
| Iceland             | 0-07 (-0-02 to 0-07) | 0-05 (0-03 to 0-08) | 0-05 (0-04 to 0-07) | 0-05 (0-03 to 0-06) |
| Ireland             | 0-08 (-0-02 to 0-08) | 0-06 (0-03 to 0-08) | 0-06 (0-04 to 0-08) | 0-05 (0-03 to 0-07) |
| Israel              | 0-07 (-0-02 to 0-07) | 0-05 (0-03 to 0-08) | 0-05 (0-04 to 0-07) | 0-05 (0-03 to 0-06) |
| Italy               | 0-09 (-0-03 to 0-09) | 0-07 (0-04 to 0-1)  | 0-07 (0-05 to 0-1)  | 0-07 (0-04 to 0-09) |
| Kazakhstan          | 0-06 (-0-02 to 0-06) | 0-05 (0-02 to 0-07) | 0-05 (0-03 to 0-07) | 0-04 (0-03 to 0-06) |
| Kyrgyzstan          | 0-03 (-0-01 to 0-03) | 0-03 (0-01 to 0-04) | 0-03 (0-02 to 0-03) | 0-02 (0-02 to 0-03) |
| Latvia              | 0-07 (-0-02 to 0-07) | 0-05 (0-03 to 0-08) | 0-05 (0-04 to 0-07) | 0-05 (0-03 to 0-06) |
| Lithuania           | 0-06 (-0-02 to 0-06) | 0-05 (0-02 to 0-07) | 0-05 (0-03 to 0-06) | 0-04 (0-03 to 0-06) |
| Luxembourg          | 0-07 (-0-02 to 0-07) | 0-05 (0-02 to 0-07) | 0-05 (0-04 to 0-07) | 0-05 (0-03 to 0-06) |
| Malta               | 0-09 (-0-03 to 0-09) | 0-07 (0-04 to 0-1)  | 0-07 (0-05 to 0-1)  | 0-07 (0-04 to 0-09) |
| Monaco              | *                    | 0-05 (0-03 to 0-08) | 0-05 (0-04 to 0-07) | 0-05 (0-03 to 0-06) |
| Montenegro          | 0-07 (-0-02 to 0-07) | 0-05 (0-03 to 0-08) | 0-05 (0-04 to 0-07) | 0-05 (0-03 to 0-06) |
| Netherlands         | 0-06 (-0-02 to 0-06) | 0-05 (0-02 to 0-07) | 0-05 (0-03 to 0-07) | 0-04 (0-03 to 0-06) |
| North Macedonia     | 0-07 (-0-02 to 0-07) | 0-05 (0-03 to 0-08) | 0-05 (0-04 to 0-07) | 0-05 (0-03 to 0-06) |
| Norway              | 0-07 (-0-02 to 0-07) | 0-06 (0-03 to 0-08) | 0-06 (0-04 to 0-08) | 0-05 (0-03 to 0-07) |
| Poland              | 0-08 (-0-02 to 0-08) | 0-06 (0-03 to 0-08) | 0-06 (0-04 to 0-08) | 0-05 (0-03 to 0-07) |
| Portugal            | 0-1 (-0-03 to 0-1)   | 0-08 (0-04 to 0-11) | 0-08 (0-05 to 0-1)  | 0-07 (0-05 to 0-09) |
| Republic of Moldova | 0-03 (-0-01 to 0-03) | 0-02 (0-01 to 0-03) | 0-02 (0-01 to 0-03) | 0-02 (0-01 to 0-03) |
| Romania             | 0-08 (-0-03 to 0-08) | 0-06 (0-03 to 0-09) | 0-06 (0-04 to 0-08) | 0-06 (0-04 to 0-08) |
| Russian Federation  | 0-04 (-0-01 to 0-04) | 0-03 (0-02 to 0-05) | 0-03 (0-02 to 0-04) | 0-03 (0-02 to 0-04) |
| San Marino          | *                    | 0-05 (0-03 to 0-08) | 0-05 (0-04 to 0-07) | 0-05 (0-03 to 0-06) |

|                                                            |                      |                     |                     |                     |
|------------------------------------------------------------|----------------------|---------------------|---------------------|---------------------|
| Serbia                                                     | 0.09 (-0.03 to 0.09) | 0.07 (0.03 to 0.1)  | 0.07 (0.05 to 0.09) | 0.06 (0.04 to 0.08) |
| Slovakia                                                   | 0.08 (-0.03 to 0.08) | 0.06 (0.03 to 0.09) | 0.06 (0.04 to 0.08) | 0.06 (0.04 to 0.07) |
| Slovenia                                                   | 0.07 (-0.02 to 0.07) | 0.06 (0.03 to 0.08) | 0.06 (0.04 to 0.08) | 0.05 (0.03 to 0.07) |
| Spain                                                      | 0.06 (-0.02 to 0.06) | 0.05 (0.02 to 0.07) | 0.05 (0.03 to 0.07) | 0.04 (0.03 to 0.06) |
| Sweden                                                     | 0.05 (-0.02 to 0.05) | 0.04 (0.02 to 0.06) | 0.04 (0.03 to 0.06) | 0.04 (0.02 to 0.05) |
| Switzerland                                                | 0.06 (-0.02 to 0.06) | 0.04 (0.02 to 0.06) | 0.04 (0.03 to 0.06) | 0.04 (0.03 to 0.05) |
| Tajikistan                                                 | 0.07 (-0.02 to 0.07) | 0.05 (0.03 to 0.08) | 0.05 (0.04 to 0.07) | 0.05 (0.03 to 0.06) |
| Turkey                                                     | 0.07 (-0.02 to 0.07) | 0.05 (0.03 to 0.08) | 0.05 (0.04 to 0.07) | 0.05 (0.03 to 0.07) |
| Turkmenistan                                               | 0.07 (-0.02 to 0.07) | 0.05 (0.03 to 0.08) | 0.05 (0.04 to 0.07) | 0.05 (0.03 to 0.06) |
| Ukraine                                                    | 0.05 (-0.01 to 0.05) | 0.04 (0.02 to 0.05) | 0.04 (0.02 to 0.05) | 0.03 (0.02 to 0.04) |
| United Kingdom of Great Britain and Northern Ireland (the) | 0.08 (-0.03 to 0.08) | 0.06 (0.03 to 0.09) | 0.06 (0.04 to 0.09) | 0.06 (0.04 to 0.08) |
| Uzbekistan                                                 | 0.05 (-0.01 to 0.05) | 0.04 (0.02 to 0.05) | 0.04 (0.02 to 0.05) | 0.03 (0.02 to 0.04) |
| <b>South-East Asian Region</b>                             |                      |                     |                     |                     |
| Bangladesh                                                 | 0.02 (-0.02 to 0.06) | 0.05 (0.02 to 0.07) | 0.05 (0.03 to 0.07) | 0.05 (0.03 to 0.06) |
| Bhutan                                                     | *                    | 0.04 (0.02 to 0.06) | 0.04 (0.04 to 0.04) | 0.04 (0.04 to 0.04) |
| Democratic People's Republic of Korea                      | 0.02 (-0.02 to 0.05) | 0.04 (0.02 to 0.06) | 0.04 (0.03 to 0.05) | 0.04 (0.02 to 0.05) |
| India                                                      | 0.03 (-0.02 to 0.08) | 0.06 (0.03 to 0.09) | 0.06 (0.04 to 0.08) | 0.05 (0.04 to 0.07) |
| Indonesia                                                  | 0.02 (-0.02 to 0.05) | 0.04 (0.02 to 0.06) | 0.04 (0.03 to 0.06) | 0.04 (0.02 to 0.05) |
| Maldives                                                   | 0.02 (-0.02 to 0.07) | 0.05 (0.03 to 0.08) | 0.05 (0.04 to 0.07) | 0.05 (0.03 to 0.07) |
| Myanmar                                                    | 0.01 (-0.01 to 0.03) | 0.02 (0.01 to 0.03) | 0.02 (0.01 to 0.03) | 0.02 (0.01 to 0.02) |
| Nepal                                                      | 0.01 (-0.01 to 0.03) | 0.02 (0.01 to 0.04) | 0.02 (0.02 to 0.03) | 0.02 (0.01 to 0.03) |
| Sri Lanka                                                  | 0.02 (-0.02 to 0.07) | 0.05 (0.03 to 0.07) | 0.05 (0.04 to 0.07) | 0.05 (0.03 to 0.06) |
| Thailand                                                   | 0.02 (-0.02 to 0.06) | 0.04 (0.02 to 0.06) | 0.04 (0.03 to 0.06) | 0.04 (0.03 to 0.05) |
| Timor-Leste                                                | 0.01 (-0.01 to 0.04) | 0.03 (0.02 to 0.05) | 0.03 (0.02 to 0.04) | 0.03 (0.02 to 0.04) |
| <b>Western Pacific Region</b>                              |                      |                     |                     |                     |
| Australia                                                  | 0.07 (-0.02 to 0.07) | 0.05 (0.03 to 0.08) | 0.05 (0.04 to 0.07) | 0.05 (0.03 to 0.07) |
| Brunei Darussalam                                          | 0.06 (-0.02 to 0.06) | 0.05 (0.02 to 0.07) | 0.05 (0.03 to 0.07) | 0.04 (0.03 to 0.06) |
| Cambodia                                                   | 0.03 (-0.01 to 0.03) | 0.02 (0.01 to 0.03) | 0.02 (0.01 to 0.03) | 0.02 (0.01 to 0.02) |
| China                                                      | 0.03 (-0.01 to 0.03) | 0.03 (0.01 to 0.04) | 0.03 (0.02 to 0.04) | 0.02 (0.02 to 0.03) |
| Cook Islands                                               | *                    | 0.03 (0.02 to 0.05) | 0.03 (0.02 to 0.05) | 0.03 (0.02 to 0.04) |
| Fiji                                                       | 0.04 (-0.01 to 0.04) | 0.03 (0.02 to 0.05) | 0.03 (0.02 to 0.04) | 0.03 (0.02 to 0.04) |
| Japan                                                      | 0.08 (-0.03 to 0.08) | 0.06 (0.03 to 0.09) | 0.06 (0.04 to 0.08) | 0.06 (0.04 to 0.08) |

|                                  |                      |                     |                     |                     |
|----------------------------------|----------------------|---------------------|---------------------|---------------------|
| Kiribati                         | *                    | 0.07 (0.04 to 0.1)  | 0.07 (0.05 to 0.1)  | 0.06 (0.04 to 0.09) |
| Lao People's Democratic Republic | 0.04 (-0.01 to 0.04) | 0.03 (0.01 to 0.04) | 0.03 (0.02 to 0.04) | 0.03 (0.02 to 0.04) |
| Malaysia                         | 0.09 (-0.03 to 0.09) | 0.07 (0.03 to 0.1)  | 0.07 (0.05 to 0.09) | 0.06 (0.04 to 0.08) |
| Marshall Islands                 | *                    | 0.08 (0.04 to 0.11) | 0.08 (0.05 to 0.1)  | 0.07 (0.05 to 0.09) |
| Micronesia (Federated States of) | 0.08 (-0.03 to 0.08) | 0.07 (0.03 to 0.09) | 0.07 (0.05 to 0.09) | 0.06 (0.04 to 0.08) |
| Mongolia                         | 0.04 (-0.01 to 0.04) | 0.03 (0.02 to 0.05) | 0.03 (0.02 to 0.05) | 0.03 (0.02 to 0.04) |
| Nauru                            | *                    | 0.07 (0.03 to 0.1)  | 0.07 (0.05 to 0.09) | 0.06 (0.04 to 0.08) |
| New Zealand                      | 0.1 (-0.03 to 0.1)   | 0.07 (0.04 to 0.11) | 0.07 (0.05 to 0.1)  | 0.07 (0.04 to 0.09) |
| Niue                             | *                    | 0.07 (0.03 to 0.1)  | 0.07 (0.05 to 0.09) | 0.06 (0.04 to 0.08) |
| Palau                            | *                    | 0.07 (0.03 to 0.1)  | 0.07 (0.05 to 0.09) | 0.06 (0.04 to 0.08) |
| Papua New Guinea                 | 0.04 (-0.01 to 0.04) | 0.03 (0.01 to 0.04) | 0.03 (0.02 to 0.04) | 0.02 (0.02 to 0.03) |
| Philippines                      | 0.09 (-0.03 to 0.09) | 0.07 (0.03 to 0.1)  | 0.07 (0.05 to 0.09) | 0.06 (0.04 to 0.08) |
| Republic of Korea                | 0.08 (-0.03 to 0.08) | 0.06 (0.03 to 0.09) | 0.06 (0.04 to 0.08) | 0.06 (0.04 to 0.08) |
| Samoa                            | 0.03 (-0.01 to 0.03) | 0.02 (0.01 to 0.03) | 0.02 (0.02 to 0.03) | 0.02 (0.01 to 0.03) |
| Singapore                        | 0.08 (-0.03 to 0.08) | 0.06 (0.03 to 0.09) | 0.06 (0.05 to 0.09) | 0.06 (0.04 to 0.08) |
| Solomon Islands                  | 0.04 (-0.01 to 0.04) | 0.03 (0.02 to 0.05) | 0.03 (0.02 to 0.05) | 0.03 (0.02 to 0.04) |
| Tonga                            | *                    | 0.03 (0.02 to 0.05) | 0.03 (0.02 to 0.04) | 0.03 (0.02 to 0.04) |
| Tuvalu                           | *                    | 0.07 (0.03 to 0.1)  | 0.07 (0.05 to 0.09) | 0.06 (0.04 to 0.08) |
| Vanuatu                          | 0.02 (-0.01 to 0.02) | 0.01 (0.01 to 0.02) | 0.01 (0.01 to 0.02) | 0.01 (0.01 to 0.02) |
| Viet Nam                         | 0.06 (-0.02 to 0.06) | 0.05 (0.02 to 0.07) | 0.05 (0.03 to 0.06) | 0.04 (0.03 to 0.06) |

\*No data available

**Table S3. Estimated populational attributable fraction (PAFs) by health outcomes, WHO Regions, and World Bank income classification (% and 95% confidence interval), 2020**

|                                           | <b>Breast cancer</b> | <b>Colorectal cancer</b> | <b>Endometrial cancer</b> | <b>Gastric cancer</b> | <b>Oesophageal cancer</b> | <b>Renal cancer</b> | <b>Bladder cancer</b> |
|-------------------------------------------|----------------------|--------------------------|---------------------------|-----------------------|---------------------------|---------------------|-----------------------|
| <b>African Region (AFR)</b>               | 0.02 (0.01 to 0.04)  | 0.02 (0.01 to 0.04)      | 0.02 (-0.01 to 0.05)      | 0.05 (-0.01 to 0.11)  | 0.05 (-0.03 to 0.15)      | 0.05 (0.01 to 0.09) | 0.01 (-0.01 to 0.04)  |
| <b>Region of the Americas (AMR)</b>       | 0.04 (0.01 to 0.06)  | 0.04 (0.01 to 0.06)      | 0.04 (-0.02 to 0.09)      | 0.09 (-0.03 to 0.19)  | 0.09 (-0.06 to 0.25)      | 0.09 (0.02 to 0.16) | 0.03 (-0.03 to 0.08)  |
| <b>Eastern Mediterranean Region (EMR)</b> | 0.04 (0.01 to 0.06)  | 0.04 (0.01 to 0.07)      | 0.04 (-0.02 to 0.09)      | 0.1 (-0.03 to 0.21)   | 0.1 (-0.06 to 0.27)       | 0.1 (0.02 to 0.18)  | 0.03 (-0.03 to 0.09)  |
| <b>European Region (EUR)</b>              | 0.03 (0.01 to 0.05)  | 0.03 (0.01 to 0.05)      | 0.03 (-0.01 to 0.07)      | 0.07 (-0.02 to 0.17)  | 0.08 (-0.05 to 0.22)      | 0.08 (0.02 to 0.14) | 0.02 (-0.02 to 0.07)  |
| <b>South-East Asia Region (SEAR)</b>      | 0.03 (0.01 to 0.05)  | 0.02 (0.01 to 0.03)      | 0.03 (-0.02 to 0.08)      | 0.06 (-0.02 to 0.13)  | 0.06 (-0.03 to 0.18)      | 0.06 (0.01 to 0.11) | 0.02 (-0.02 to 0.05)  |
| <b>Western Pacific Region (WPR)</b>       | 0.02 (0.01 to 0.03)  | 0.03 (0.01 to 0.05)      | 0.02 (-0.01 to 0.04)      | 0.08 (-0.02 to 0.17)  | 0.08 (-0.05 to 0.23)      | 0.08 (0.02 to 0.14) | 0.02 (-0.02 to 0.07)  |
| <b>Low-income</b>                         | 0.02 (0.01 to 0.03)  | 0.02 (0 to 0.03)         | 0.02 (-0.01 to 0.04)      | 0.04 (-0.01 to 0.1)   | 0.04 (-0.02 to 0.13)      | 0.04 (0.01 to 0.08) | 0.01 (-0.01 to 0.04)  |
| <b>Lower-middle-income</b>                | 0.03 (0.01 to 0.05)  | 0.03 (0.01 to 0.05)      | 0.03 (-0.02 to 0.08)      | 0.07 (-0.02 to 0.17)  | 0.08 (-0.05 to 0.22)      | 0.08 (0.02 to 0.14) | 0.02 (-0.02 to 0.07)  |
| <b>Upper-middle-income</b>                | 0.02 (0.01 to 0.03)  | 0.02 (0.01 to 0.04)      | 0.02 (-0.01 to 0.05)      | 0.06 (-0.02 to 0.13)  | 0.06 (-0.03 to 0.18)      | 0.06 (0.01 to 0.11) | 0.02 (-0.02 to 0.05)  |
| <b>High-income</b>                        | 0.04 (0.01 to 0.06)  | 0.04 (0.01 to 0.06)      | 0.04 (-0.02 to 0.08)      | 0.09 (-0.03 to 0.2)   | 0.09 (-0.06 to 0.26)      | 0.09 (0.02 to 0.17) | 0.03 (-0.03 to 0.08)  |

(continued from previous table)

|                                           | <b>Coronary Heart Disease</b> | <b>Depression</b> | <b>Dementia</b>     | <b>Hypertension</b> | <b>Stroke</b>       | <b>Type 2 diabetes</b> |
|-------------------------------------------|-------------------------------|-------------------|---------------------|---------------------|---------------------|------------------------|
| <b>African Region (AFR)</b>               | 0.03 (0.02 to 0.05)           | 0.05 (0 to 0.1)   | 0.08 (0.04 to 0.13) | 0.01 (0.01 to 0.02) | 0.03 (0.02 to 0.05) | 0.03 (0.02 to 0.04)    |
| <b>Region of the Americas (AMR)</b>       | 0.06 (0.04 to 0.08)           | 0.09 (0 to 0.18)  | 0.14 (0.07 to 0.22) | 0.02 (0.01 to 0.03) | 0.06 (0.03 to 0.09) | 0.06 (0.04 to 0.07)    |
| <b>Eastern Mediterranean Region (EMR)</b> | 0.07 (0.05 to 0.09)           | 0.1 (0 to 0.2)    | 0.12 (0.07 to 0.2)  | 0.02 (0.01 to 0.03) | 0.07 (0.03 to 0.1)  | 0.06 (0.04 to 0.08)    |
| <b>European Region (EUR)</b>              | 0.05 (0.04 to 0.07)           | 0.08 (0 to 0.15)  | 0.11 (0.06 to 0.17) | 0.02 (0.01 to 0.03) | 0.05 (0.03 to 0.08) | 0.05 (0.03 to 0.06)    |
| <b>South-East Asia Region (SEAR)</b>      | 0.04 (0.03 to 0.05)           | 0.06 (0 to 0.12)  | 0.11 (0.06 to 0.18) | 0.01 (0.01 to 0.02) | 0.04 (0.02 to 0.06) | 0.04 (0.02 to 0.05)    |
| <b>Western Pacific Region (WPR)</b>       | 0.05 (0.04 to 0.07)           | 0.08 (0 to 0.16)  | 0.07 (0.04 to 0.12) | 0.02 (0.01 to 0.03) | 0.05 (0.03 to 0.08) | 0.05 (0.03 to 0.07)    |
| <b>Low-income</b>                         | 0.03 (0.02 to 0.04)           | 0.04 (0 to 0.09)  | 0.06 (0.03 to 0.1)  | 0.01 (0 to 0)       | 0.03 (0.01 to 0.04) | 0.03 (0.02 to 0.04)    |
| <b>Lower-middle-income</b>                | 0.05 (0.04 to 0.07)           | 0.08 (0 to 0.16)  | 0.11 (0.06 to 0.17) | 0.02 (0.01 to 0.03) | 0.05 (0.03 to 0.08) | 0.05 (0.03 to 0.06)    |
| <b>Upper-middle-income</b>                | 0.04 (0.03 to 0.06)           | 0.06 (0 to 0.12)  | 0.08 (0.04 to 0.14) | 0.01 (0.01 to 0.02) | 0.04 (0.02 to 0.06) | 0.04 (0.02 to 0.05)    |
| <b>High-income</b>                        | 0.07 (0.05 to 0.09)           | 0.09 (0 to 0.19)  | 0.13 (0.07 to 0.2)  | 0.02 (0.01 to 0.03) | 0.07 (0.03 to 0.09) | 0.06 (0.04 to 0.08)    |



**Table S4. Estimated direct healthcare cost per incident case of cancer by WHO Region and country in US\$ 2020**

| <b>African region (AFR)</b>      | <b>Breast</b> | <b>Colorectal</b> | <b>Endometrial</b> | <b>Gastric</b> | <b>Oesophageal</b> | <b>Renal</b> | <b>Bladder</b> |
|----------------------------------|---------------|-------------------|--------------------|----------------|--------------------|--------------|----------------|
| Algeria                          | 1806          | 2317              | 2107               | 1204           | 1204               | 1987         | 2710           |
| Angola                           | 1248          | 1348              | 1373               | 832            | 832                | 1373         | 1872           |
| Benin                            | 598           | 897               | 658                | 399            | 399                | 658          | 897            |
| Botswana                         | 1737          | 2926              | 2660               | 1158           | 1158               | 1910         | 2605           |
| Burkina Faso                     | 791           | 1291              | 870                | 527            | 527                | 870          | 1186           |
| Burundi                          | 1058          | 1599              | 1629               | 987            | 987                | 1629         | 2221           |
| Cabo Verde                       | 1290          | 1277              | 1257               | 860            | 860                | 1419         | 1759           |
| Cameroon                         | 1118          | 1561              | 1953               | 746            | 746                | 1230         | 1525           |
| Central African Republic         | 597           | 832               | 657                | 398            | 398                | 657          | 895            |
| Chad                             | 594           | 1362              | 654                | 396            | 396                | 654          | 891            |
| Comoros                          | 1628          | 2001              | 1790               | 1194           | 1194               | 1791         | 1791           |
| Congo                            | 1622          | 2818              | 1849               | 1189           | 1189               | 1784         | 1784           |
| Côte d'Ivoire                    | 1436          | 1685              | 1709               | 1053           | 1053               | 1580         | 1580           |
| Democratic Republic of the Congo | 1039          | 882               | 743                | 450            | 450                | 743          | 1013           |
| Equatorial Guinea                | 2691          | 2374              | 1885               | 1866           | 1794               | 2960         | 4037           |
| Eritrea                          | 860           | 993               | 497                | 301            | 301                | 497          | 677            |
| Eswatini                         | 1350          | 1466              | 800                | 800            | 1350               | 1485         | 2025           |
| Ethiopia                         | 800           | 776               | 660                | 400            | 400                | 660          | 900            |
| Gabon                            | 1815          | 3769              | 1979               | 1210           | 1210               | 1997         | 2723           |
| Gambia                           | 806           | 1828              | 1862               | 1128           | 1128               | 1862         | 2539           |
| Ghana                            | 1835          | 2648              | 869                | 1668           | 1668               | 2018         | 2752           |
| Guinea                           | 448           | 985               | 1969               | 1193           | 1193               | 1969         | 2685           |
| Guinea-Bissau                    | 1189          | 1284              | 1307               | 792            | 792                | 1307         | 1783           |
| Kenya                            | 1383          | 1568              | 858                | 1383           | 1383               | 1522         | 2075           |
| Lesotho                          | 1761          | 1460              | 1368               | 1291           | 1291               | 1420         | 1937           |
| Liberia                          | 892           | 2158              | 981                | 594            | 594                | 981          | 1337           |
| Madagascar                       | 948           | 1896              | 1043               | 632            | 632                | 1043         | 1422           |
| Malawi                           | 899           | 1723              | 989                | 599            | 599                | 989          | 1349           |
| Mali                             | 996           | 784               | 575                | 349            | 349                | 575          | 784            |
| Mauritania                       | 1402          | 2325              | 2034               | 1402           | 1402               | 1542         | 2103           |
| Mauritius                        | 2638          | 1969              | 1790               | 1759           | 1759               | 2902         | 3957           |

|                                    |               |                   |                    |                |                    |              |                |
|------------------------------------|---------------|-------------------|--------------------|----------------|--------------------|--------------|----------------|
| Mozambique                         | 1196          | 1128              | 877                | 532            | 532                | 877          | 1196           |
| Namibia                            | 1935          | 3567              | 1779               | 1290           | 1290               | 2128         | 2902           |
| Niger                              | 768           | 1742              | 1775               | 1076           | 1076               | 1775         | 2420           |
| Nigeria                            | 1453          | 1719              | 1467               | 1065           | 1065               | 1598         | 1598           |
| Rwanda                             | 792           | 1235              | 654                | 396            | 396                | 654          | 891            |
| Sao Tome and Principe              | 1464          | 1719              | 1110               | 1110           | 927                | 1576         | 1342           |
| Senegal                            | 847           | 1514              | 1625               | 565            | 565                | 932          | 1271           |
| Sierra Leone                       | 809           | 2053              | 890                | 539            | 539                | 890          | 1213           |
| Somalia                            | 1251          | 870               | 894                | 542            | 542                | 894          | 1220           |
| South Africa                       | 1557          | 4052              | 3684               | 1038           | 1038               | 1713         | 2336           |
| South Sudan                        | 918           | 1114              | 1010               | 612            | 612                | 1010         | 1378           |
| Tanzania United Republic of        | 1248          | 1348              | 1373               | 832            | 832                | 1373         | 1872           |
| Togo                               | 774           | 1168              | 568                | 344            | 344                | 568          | 774            |
| Uganda                             | 1110          | 1069              | 814                | 493            | 493                | 814          | 1110           |
| Zambia                             | 1434          | 1458              | 1640               | 956            | 956                | 1434         | 1434           |
| Zimbabwe                           | 1686          | 1508              | 919                | 1237           | 1237               | 1360         | 1855           |
| <b>AFR (mean)</b>                  | <b>1245</b>   | <b>1704</b>       | <b>1329</b>        | <b>881</b>     | <b>887</b>         | <b>1353</b>  | <b>1758</b>    |
| <b>Region of the America (AMR)</b> | <b>Breast</b> | <b>Colorectal</b> | <b>Endometrial</b> | <b>Gastric</b> | <b>Oesophageal</b> | <b>Renal</b> | <b>Bladder</b> |
| Argentina                          | 2103          | 3469              | 3154               | 1402           | 1402               | 2313         | 3154           |
| Bahamas                            | 10793         | 12128             | 15160              | 12735          | 10107              | 22235        | 16777          |
| Barbados                           | 7526          | 7931              | 9913               | 8327           | 6609               | 14539        | 10971          |
| Belize                             | 1940          | 2850              | 2591               | 1294           | 1294               | 2134         | 2911           |
| Bolivia                            | 1675          | 1787              | 791                | 791            | 1228               | 1351         | 1842           |
| Brazil                             | 1517          | 3041              | 2765               | 1011           | 1011               | 1669         | 2276           |
| Canada                             | 25895         | 17573             | 21967              | 18452          | 14644              | 32218        | 24310          |
| Chile                              | 26708         | 19052             | 23815              | 20005          | 15877              | 34929        | 26356          |
| Colombia                           | 1247          | 3032              | 2756               | 831            | 831                | 1372         | 1871           |
| Costa Rica                         | 1158          | 3167              | 2436               | 772            | 772                | 1273         | 1737           |
| Cuba                               | 1501          | 3180              | 2891               | 1001           | 1001               | 1651         | 2251           |
| Dominican Republic                 | 1880          | 1691              | 1537               | 1253           | 1253               | 2068         | 2820           |
| Ecuador                            | 1424          | 3817              | 3470               | 949            | 949                | 1566         | 2136           |
| El Salvador                        | 1422          | 1636              | 2035               | 1422           | 1422               | 1564         | 2132           |
| Guatemala                          | 1598          | 6535              | 5941               | 1065           | 1065               | 1758         | 2397           |
| Guyana                             | 1881          | 2462              | 1939               | 1254           | 1254               | 2069         | 2822           |

|                                           |                |                   |                    |                |                    |                |                |
|-------------------------------------------|----------------|-------------------|--------------------|----------------|--------------------|----------------|----------------|
| Haiti                                     | 922            | 996               | 1015               | 615            | 615                | 1015           | 1383           |
| Honduras                                  | 1415           | 1617              | 2476               | 1415           | 1415               | 1557           | 2123           |
| Jamaica                                   | 1605           | 3148              | 2862               | 1070           | 1070               | 1766           | 2408           |
| Mexico                                    | 1351           | 3392              | 3084               | 901            | 901                | 1486           | 2027           |
| Nicaragua                                 | 1382           | 1484              | 1024               | 1014           | 1014               | 1521           | 1521           |
| Panama                                    | 17867          | 18205             | 22756              | 19115          | 15171              | 33375          | 25183          |
| Paraguay                                  | 1773           | 2189              | 1990               | 1182           | 1182               | 1950           | 2659           |
| Peru                                      | 1488           | 3396              | 3088               | 992            | 992                | 1637           | 2232           |
| Saint Lucia                               | 2034           | 2260              | 2054               | 1356           | 1356               | 2237           | 3051           |
| Suriname                                  | 1185           | 1907              | 1734               | 790            | 790                | 1304           | 1778           |
| Trinidad and Tobago                       | 16222          | 32693             | 27244              | 45770          | 18163              | 29969          | 36180          |
| United States of America                  | 11911          | 12398             | 15498              | 13018          | 10332              | 22730          | 17151          |
| Uruguay                                   | 7941           | 8266              | 10332              | 8679           | 6888               | 15153          | 11434          |
| Venezuela (Bolivarian Republic of)        | 1450           | 3474              | 3158               | 967            | 967                | 1595           | 2175           |
| <b>AMR (mean)</b>                         | <b>5293·82</b> | <b>6292·56</b>    | <b>6715·78</b>     | <b>5648·24</b> | <b>4052·47</b>     | <b>8066·81</b> | <b>7268·89</b> |
|                                           |                |                   |                    |                |                    |                |                |
| <b>Eastern Mediterranean Region (EMR)</b> | <b>Breast</b>  | <b>Colorectal</b> | <b>Endometrial</b> | <b>Gastric</b> | <b>Oesophageal</b> | <b>Renal</b>   | <b>Bladder</b> |
| Afghanistan                               | 889            | 2005              | 978                | 593            | 593                | 978            | 1334           |
| Bahrain                                   | 54946          | 71409             | 89262              | 74980          | 59508              | 130917         | 98783          |
| Djibouti                                  | 1633           | 2151              | 1412               | 1198           | 1198               | 1796           | 1796           |
| Egypt                                     | 1366           | 1682              | 809                | 1366           | 1366               | 1502           | 2049           |
| Iran Islamic Republic of                  | 1203           | 4957              | 4506               | 802            | 802                | 1324           | 1805           |
| Iraq                                      | 1802           | 4437              | 903                | 903            | 903                | 1982           | 2702           |
| Jordan                                    | 1354           | 3931              | 3573               | 903            | 903                | 1490           | 2031           |
| Kuwait                                    | 42898          | 58490             | 73113              | 61415          | 48742              | 107232         | 80912          |
| Lebanon                                   | 1251           | 2371              | 2156               | 834            | 834                | 1376           | 1876           |
| Libya                                     | 1076           | 6245              | 4804               | 718            | 718                | 1184           | 1615           |
| Morocco                                   | 1381           | 1817              | 2040               | 1381           | 1381               | 1519           | 2072           |
| Oman                                      | 36162          | 35726             | 44657              | 37512          | 29771              | 65497          | 49420          |
| Pakistan                                  | 1649           | 1585              | 1789               | 1209           | 1209               | 1814           | 1814           |
| Qatar                                     | 21762          | 20726             | 25907              | 21762          | 17272              | 37998          | 28671          |
| Saudi Arabia                              | 27070          | 26453             | 33067              | 27776          | 22045              | 48498          | 36594          |
| Sudan                                     | 1681           | 1370              | 1698               | 1233           | 1233               | 1356           | 1849           |
| Syrian Arab Republic                      | 854            | 939               | 939                | 569            | 569                | 939            | 1281           |
| Tunisia                                   | 1664           | 1458              | 3248               | 1513           | 1513               | 1830           | 2496           |

|                              |               |                   |                    |                |                    |              |                |
|------------------------------|---------------|-------------------|--------------------|----------------|--------------------|--------------|----------------|
| United Arab Emirates         | 21439         | 15956             | 19944              | 16753          | 13296              | 29252        | 22072          |
| Yemen                        | 653           | 705               | 718                | 435            | 435                | 718          | 979            |
| <b>EMR (mean)</b>            | <b>11137</b>  | <b>13221</b>      | <b>15776</b>       | <b>12693</b>   | <b>10214</b>       | <b>21960</b> | <b>17107</b>   |
|                              |               |                   |                    |                |                    |              |                |
| <b>European Region (EUR)</b> | <b>Breast</b> | <b>Colorectal</b> | <b>Endometrial</b> | <b>Gastric</b> | <b>Oesophageal</b> | <b>Renal</b> | <b>Bladder</b> |
| Albania                      | 1558          | 2511              | 2283               | 1039           | 1039               | 1714         | 2337           |
| Armenia                      | 1680          | 2848              | 2590               | 1120           | 1120               | 1848         | 2520           |
| Austria                      | 43754         | 36059             | 45074              | 37862          | 30049              | 66108        | 49882          |
| Azerbaijan                   | 1630          | 2372              | 2157               | 1087           | 1087               | 1793         | 2445           |
| Belarus                      | 1409          | 2464              | 2240               | 939            | 939                | 1550         | 2114           |
| Belgium                      | 27653         | 24600             | 30750              | 25830          | 20500              | 45100        | 34030          |
| Bosnia and Herzegovina       | 1612          | 3068              | 2789               | 1075           | 1075               | 1773         | 2418           |
| Bulgaria                     | 1190          | 1911              | 1738               | 794            | 794                | 1309         | 1785           |
| Croatia                      | 8822          | 6660              | 8325               | 6993           | 5550               | 12210        | 9213           |
| Cyprus                       | 17028         | 15339             | 19174              | 16106          | 12782              | 28121        | 21219          |
| Czech Republic               | 14662         | 10198             | 12748              | 10708          | 8498               | 18697        | 14107          |
| Denmark                      | 32302         | 21986             | 27483              | 23086          | 18322              | 40308        | 30414          |
| Estonia                      | 12081         | 7576              | 9470               | 7955           | 6313               | 13890        | 10480          |
| Finland                      | 17745         | 15264             | 19080              | 16027          | 12720              | 27984        | 21115          |
| France                       | 32239         | 23844             | 29805              | 25036          | 19870              | 43714        | 32984          |
| Georgia                      | 2608          | 2192              | 854                | 854            | 854                | 2869         | 3912           |
| Germany                      | 35782         | 25354             | 31692              | 26622          | 21128              | 46482        | 35073          |
| Greece                       | 11917         | 8205              | 10256              | 8615           | 6837               | 15042        | 11350          |
| Hungary                      | 7427          | 6495              | 8119               | 6820           | 5413               | 11908        | 8985           |
| Iceland                      | 29685         | 26539             | 33174              | 27866          | 22116              | 48655        | 36713          |
| Ireland                      | 34268         | 22645             | 28306              | 23777          | 18871              | 41515        | 31325          |
| Israel                       | 39089         | 41401             | 51751              | 43471          | 34501              | 75902        | 57271          |
| Italy                        | 18259         | 16051             | 20063              | 16853          | 13375              | 29426        | 22203          |
| Kazakhstan                   | 1580          | 4102              | 3729               | 1054           | 1054               | 1738         | 2371           |
| Kyrgyzstan                   | 1373          | 1464              | 939                | 915            | 915                | 1373         | 1373           |
| Latvia                       | 8585          | 7144              | 8930               | 7501           | 5953               | 13097        | 9882           |
| Lithuania                    | 11089         | 8861              | 11076              | 9304           | 7384               | 16245        | 12257          |
| Luxembourg                   | 43400         | 40998             | 51248              | 43048          | 34165              | 75164        | 56715          |
| Malta                        | 19228         | 19725             | 24656              | 20711          | 16438              | 36163        | 27286          |
| Moldova Republic of          | 1524          | 1674              | 1534               | 1758           | 1395               | 2250         | 1698           |

|                                        |               |                   |                    |                |                    |              |                |
|----------------------------------------|---------------|-------------------|--------------------|----------------|--------------------|--------------|----------------|
| Montenegro                             | 1165          | 2522              | 2293               | 777            | 777                | 1281         | 1747           |
| Netherlands                            | 32488         | 26346             | 32933              | 27664          | 21955              | 48302        | 36446          |
| North Macedonia                        | 15834         | 14150             | 17688              | 14858          | 11792              | 25942        | 19575          |
| Norway                                 | 41865         | 27852             | 34815              | 29244          | 23210              | 51061        | 38528          |
| Poland                                 | 10690         | 7932              | 9915               | 8329           | 6610               | 14542        | 10973          |
| Portugal                               | 14077         | 10121             | 12651              | 10627          | 8434               | 18555        | 14001          |
| Romania                                | 1292          | 2551              | 2319               | 862            | 862                | 1422         | 1938           |
| Russian Federation                     | 1321          | 2842              | 2584               | 881            | 881                | 1454         | 1982           |
| Serbia                                 | 1304          | 2098              | 1907               | 869            | 869                | 1434         | 1956           |
| Slovakia                               | 14375         | 10166             | 12708              | 10675          | 8472               | 18638        | 14063          |
| Slovenia                               | 17058         | 11727             | 14659              | 12313          | 9773               | 21500        | 16223          |
| Spain                                  | 15947         | 11617             | 14521              | 12197          | 9681               | 21297        | 16070          |
| Sweden                                 | 23410         | 18505             | 23131              | 19430          | 15421              | 33926        | 25599          |
| Switzerland                            | 62458         | 46616             | 58271              | 48947          | 38847              | 85464        | 64486          |
| Tajikistan                             | 784           | 1984              | 863                | 523            | 523                | 863          | 1177           |
| Turkey                                 | 1168          | 3543              | 3221               | 779            | 779                | 1285         | 1752           |
| Turkmenistan                           | 1764          | 2704              | 2459               | 1176           | 1176               | 1940         | 2646           |
| Ukraine                                | 1750          | 782               | 798                | 1284           | 1284               | 1412         | 1926           |
| United Kingdom                         | 95309         | 62873             | 78591              | 66016          | 52394              | 115267       | 86974          |
| Uzbekistan                             | 1314          | 1451              | 1713               | 876            | 876                | 1446         | 1792           |
| <b>EUR (mean)</b>                      | <b>16731</b>  | <b>13559</b>      | <b>16601</b>       | <b>13663</b>   | <b>10913</b>       | <b>23820</b> | <b>18307</b>   |
|                                        |               |                   |                    |                |                    |              |                |
| <b>South-East Africa Region (SEAR)</b> | <b>Breast</b> | <b>Colorectal</b> | <b>Endometrial</b> | <b>Gastric</b> | <b>Oesophageal</b> | <b>Renal</b> | <b>Bladder</b> |
| Bangladesh                             | 1890          | 2748              | 1154               | 1718           | 1718               | 2079         | 2834           |
| Bhutan                                 | 731           | 1410              | 1683               | 488            | 488                | 804          | 1097           |
| Democratic People's Republic of Korea  | 903           | 1235              | 662                | 401            | 401                | 662          | 903            |
| India                                  | 2077          | 3129              | 11293              | 1385           | 1385               | 2284         | 3115           |
| Indonesia                              | 1356          | 1567              | 685                | 1356           | 1356               | 1492         | 2035           |
| Maldives                               | 1541          | 7291              | 6628               | 1027           | 1027               | 1695         | 2311           |
| Myanmar                                | 1267          | 1380              | 1174               | 844            | 844                | 1393         | 1727           |
| Nepal                                  | 876           | 1051              | 963                | 584            | 584                | 963          | 1313           |
| Sri Lanka                              | 1888          | 2844              | 10266              | 1259           | 1259               | 2077         | 2832           |
| Thailand                               | 1221          | 3092              | 2811               | 814            | 814                | 1344         | 1832           |
| Timor-Leste                            | 599           | 1060              | 1391               | 399            | 399                | 659          | 899            |
| <b>SEAR (mean)</b>                     | <b>1304</b>   | <b>2437</b>       | <b>3519</b>        | <b>934</b>     | <b>934</b>         | <b>1405</b>  | <b>1900</b>    |

| <b>Western Pacific Region (WPR)</b> | <b>Breast</b> | <b>Colorectal</b> | <b>Endometrial</b> | <b>Gastric</b> | <b>Oesophageal</b> | <b>Renal</b> | <b>Bladder</b> |
|-------------------------------------|---------------|-------------------|--------------------|----------------|--------------------|--------------|----------------|
| Australia                           | 34359         | 19335             | 24168              | 20301          | 16112              | 35447        | 26746          |
| Brunei Darussalam                   | 6893          | 8590              | 10737              | 9019           | 7158               | 15748        | 11882          |
| Cambodia                            | 2119          | 1055              | 857                | 1413           | 1413               | 2331         | 3179           |
| China                               | 1676          | 3447              | 3133               | 1117           | 1117               | 1843         | 2514           |
| Fiji                                | 1346          | 3743              | 3403               | 897            | 897                | 1480         | 2018           |
| Japan                               | 46636         | 20938             | 26172              | 21985          | 17448              | 38386        | 28964          |
| Kiribati                            | 1522          | 1725              | 944                | 1522           | 1522               | 1674         | 2282           |
| Korea Republic of                   | 10037         | 5103              | 6378               | 5358           | 4252               | 9355         | 7059           |
| Lao People's Democratic Republic    | 676           | 1595              | 798                | 450            | 450                | 743          | 1013           |
| Malaysia                            | 1872          | 2151              | 1955               | 1248           | 1248               | 2059         | 2808           |
| Mongolia                            | 1601          | 1455              | 997                | 1174           | 1174               | 1761         | 1761           |
| New Zealand                         | 22796         | 13486             | 16857              | 14160          | 11238              | 24724        | 18656          |
| Papua New Guinea                    | 1593          | 1472              | 1669               | 1168           | 1168               | 1753         | 1753           |
| Philippines                         | 1708          | 1612              | 957                | 1253           | 1253               | 1378         | 1879           |
| Samoa                               | 1301          | 3090              | 2809               | 867            | 867                | 1431         | 1951           |
| Singapore                           | 14437         | 10382             | 12978              | 10901          | 8652               | 19034        | 14362          |
| Solomon Islands                     | 236           | 1191              | 1251               | 1251           | 158                | 260          | 354            |
| Vanuatu                             | 1774          | 2293              | 399                | 1196           | 1533               | 2102         | 2440           |
| Viet Nam                            | 1020          | 2159              | 783                | 680            | 680                | 1122         | 1391           |
| <b>WPR (mean)</b>                   | <b>8084</b>   | <b>5517</b>       | <b>6171</b>        | <b>5051</b>    | <b>4123</b>        | <b>8559</b>  | <b>7001</b>    |

**Table S5. Estimated direct healthcare costs for stroke, coronary heart disease and hypertension, by country and WHO Regions, in US\$ 2020**

| WHO Region                       | Stroke  | Coronary Heart Disease | Hypertension |
|----------------------------------|---------|------------------------|--------------|
| African Region                   | 283·96  | 86·00                  | 55·64        |
| Algeria                          | 916·32  | 300·52                 | 178·70       |
| Angola                           | 175·33  | 54·13                  | 30·57        |
| Benin                            | 77·91   | 24·80                  | 15·45        |
| Botswana                         | 1030·39 | 280·34                 | 202·09       |
| Burkina Faso                     | 121·84  | 29·07                  | 20·74        |
| Burundi                          | 56·09   | 14·24                  | 12·21        |
| Cabo Verde                       | 354·65  | 90·48                  | 74·16        |
| Cameroon                         | 120·22  | 37·78                  | 24·80        |
| Central Africa Republic          | 51·69   | 10·97                  | 18·01        |
| Chad                             | 80·92   | 29·02                  | 14·67        |
| Comoros (The)                    | 123·84  | 37·79                  | 24·91        |
| Congo                            | 159·66  | 60·86                  | 23·27        |
| Côte d'Ivoire                    | 164·93  | 44·59                  | 32·72        |
| Democratic Republic of the Congo | 159·66  | 10·14                  | 5·70         |
| Equatorial Guinea                | 697·43  | 252·54                 | 129·30       |
| Eritrea                          | 56·37   | 21·15                  | 13·68        |
| Eswatini                         | 668·91  | 202·00                 | 129·13       |
| Ethiopia                         | 61·88   | 18·15                  | 12·37        |
| Gabon                            | 466·47  | 138·62                 | 91·11        |
| Ghana                            | 140·17  | 54·72                  | 31·18        |
| Guinea                           | 95·49   | 33·78                  | 20·28        |
| Guinea*Bissau                    | 112·18  | 39·60                  | 22·87        |
| Kenya                            | 148·84  | 45·65                  | 0·04         |
| Lesotho                          | 267·93  | 76·20                  | 57·36        |
| Liberia                          | 116·69  | 39·08                  | 19·09        |
| Madagascar                       | 82·03   | 24·66                  | 14·68        |
| Malawi                           | 114·28  | 33·49                  | 22·18        |
| Mali                             | 86·11   | 24·71                  | 16·71        |
| Mauritania                       | 171·18  | 54·19                  | 35·29        |
| Mauritius                        | 1207·03 | 337·26                 | 256·29       |
| Mozambique                       | 104·37  | 26·63                  | 21·86        |
| Namibia                          | 869·28  | 317·22                 | 163·84       |
| Niger                            | 73·29   | 20·25                  | 14·48        |
| Nigeria                          | 208·82  | 63·67                  | 43·25        |
| Rwanda                           | 136·00  | 37·97                  | 31·52        |
| Sao Tome and Principe            | 201·84  | 48·21                  | 39·71        |
| Senegal                          | 135·35  | 41·13                  | 27·17        |
| Seychelles                       | 1361·22 | 350·69                 | 287·52       |
| Sierra Leone                     | 241·11  | 85·30                  | 47·76        |
| South Africa                     | 1029·48 | 316·52                 | 209·63       |
| South Sudan                      | 139·64  | 86·00                  | 21·12        |
| the Gambia                       | 77·77   | 22·09                  | 15·00        |
| Togo                             | 95·84   | 28·67                  | 20·30        |

|                                     |                |               |               |
|-------------------------------------|----------------|---------------|---------------|
| Uganda                              | 124.93         | 38.72         | 25.86         |
| United Republic of Tanzania         | 103.03         | 28.95         | 20.87         |
| Zambia                              | 169.86         | 50.99         | 38.69         |
| Zimbabwe                            | 187.76         | 58.45         | 36.76         |
| <b>Region of the Americas</b>       | <b>1397.72</b> | <b>407.96</b> | <b>281.54</b> |
| Antigua and Barbuda                 | 1203.64        | 346.52        | 260.94        |
| Argentina                           | 2063.44        | 616.21        | 369.31        |
| Bahamas (The)                       | 2009.94        | 468.04        | 372.21        |
| Barbados                            | *              | *             | *             |
| Belize                              | 456.09         | 145.78        | 93.98         |
| Bolivia (Plurinational State of)    | 458.48         | 131.97        | 92.08         |
| Brazil                              | 1400.11        | 410.60        | 284.15        |
| Canada                              | 4744.06        | 1384.43       | 965.21        |
| Chile                               | 2071.44        | 551.41        | 427.97        |
| Colombia                            | 1052.15        | 308.45        | 214.46        |
| Costa Rica                          | 1174.98        | 357.48        | 248.08        |
| Cuba                                | 2377.70        | 930.97        | 467.63        |
| Dominica                            | 551.22         | 164.81        | 131.83        |
| Dominican Republic (The)            | 901.46         | 246.47        | 188.87        |
| Ecuador                             | 896.89         | 287.40        | 177.22        |
| El Salvador                         | 544.20         | 166.48        | 109.95        |
| Grenada                             | 635.59         | 180.66        | 128.78        |
| Guatemala                           | 448.41         | 133.53        | 89.65         |
| Guyana                              | 441.43         | 118.91        | 95.21         |
| Haiti                               | 138.83         | 44.61         | 26.66         |
| Honduras                            | 325.07         | 99.37         | 67.24         |
| Jamaica                             | 521.43         | 141.54        | 103.78        |
| Mexico                              | 1012.39        | 310.28        | 197.86        |
| Nicaragua                           | 446.71         | 120.63        | 87.97         |
| Panama                              | 1594.50        | 443.22        | 344.63        |
| Paraguay                            | 815.22         | 233.20        | 173.61        |
| Peru                                | 659.34         | 192.20        | 142.30        |
| Saint Kitts and Nevis               | 1466.72        | 406.01        | 288.74        |
| Saint Lucia                         | 601.31         | 168.91        | 113.32        |
| Saint Vincent and the Grenadines    | 479.24         | 133.72        | 102.02        |
| Suriname                            | 882.65         | 281.69        | 218.96        |
| Trinidad and Tobago                 | 2065.07        | 597.15        | 389.72        |
| United States of America            | 9642.00        | 2778.27       | 1971.97       |
| Uruguay                             | 2043.18        | 561.69        | 402.66        |
| Venezuela (Bolivarian Republic of)  |                |               |               |
| <b>Eastern Mediterranean Region</b> | <b>1455.59</b> | <b>394.30</b> | <b>264.55</b> |
| Afghanistan                         | 215.50         | 55.98         | 34.60         |
| Bahrain                             | 2137.22        | 683.17        | 362.95        |
| Egypt                               | 624.66         | 170.88        | 113.99        |
| Iran (Islamic Republic of)          | 1661.20        | 394.65        | 313.94        |
| Iraq                                | 682.49         | 147.04        | 132.89        |
| Jordan                              | 708.13         | 201.34        | 136.94        |
| Kuwait                              | 3551.16        | 881.89        | 681.03        |



|                        |                |               |               |
|------------------------|----------------|---------------|---------------|
| Lebanon                | 1021.16        | 285.38        | 201.55        |
| Libya                  | *              | *             |               |
| Morocco                | 415.16         | 117.90        | 86.71         |
| Oman                   | 1559.73        | 528.07        | 321.03        |
| Pakistan               | 143.67         | 37.46         | 33.08         |
| Qatar                  | 3202.82        | 1149.70       | 587.64        |
| Saudi Arabia           | 3551.22        | 946.37        | 653.36        |
| Somalia                | *              | *             |               |
| Sudan                  | 139.64         | 85.14         | 54.40         |
| Syrian Arab Republic   | *              | *             |               |
| Tunisia                | 825.73         | 237.80        | 169.33        |
| United Arab Emirates   | 2862.72        | 736.53        | 588.89        |
| Yemen                  |                |               |               |
| Djibouti               | 126.96         | 43.86         | 25.04         |
| <b>European Region</b> | <b>2457.25</b> | <b>692.39</b> | <b>544.01</b> |
| Albania                | 609.58         | 166.58        | 129.43        |
| Andorra                | 3134.85        | 906.32        | 669.52        |
| Armenia                | 941.55         | 258.48        | 192.48        |
| Austria                | 6965.86        | 1800.85       | 1091.26       |
| Azerbaijan             | 618.98         | 216.65        | 117.60        |
| Belarus                | 1034.16        | 328.24        | 210.21        |
| Belgium                | 4031.53        | 1060.68       | 1003.25       |
| Bosnia and Herzegovina | 1158.55        | 328.42        | 241.45        |
| Bulgaria               | 1487.54        | 396.70        | 303.26        |
| Croatia                | 1674.84        | 454.82        | 348.24        |
| Cyprus                 | 941.25         | 708.21        | 487.22        |
| Czechia                | 2244.23        | 329.88        | 564.37        |
| Denmark                | 2440.61        | 947.35        | 1075.52       |
| Estonia                | 3423.09        | 288.82        | 450.61        |
| Finland                | 7274.60        | 1421.74       | 827.33        |
| France                 | 3083.01        | 1027.69       | 974.58        |
| Georgia                | 693.74         | 202.79        | 147.73        |
| Germany                | 7298.74        | 1385.57       | 1131.93       |
| Greece                 | 1753.80        | 1014.04       | 434.38        |
| Hungary                | 1488.15        | 439.61        | 392.62        |
| Iceland                | 4476.22        | 1164.86       | 949.10        |
| Ireland                | 4154.04        | 1181.07       | 1094.53       |
| Israel                 | 2916.28        | 774.28        | 595.36        |
| Italy                  | 4198.48        | 1018.49       | 672.69        |
| Kazakhstan             | 761.88         | 223.23        | 145.48        |
| Kyrgyzstan             | 218.41         | 72.24         | 48.25         |
| Latvia                 | 753.61         | 206.14        | 351.89        |
| Lithuania              | 1123.26        | 297.73        | 429.33        |
| Luxembourg             | 5319.76        | 1925.11       | 1122.58       |
| Malta                  | 2032.11        | 671.67        | 723.41        |
| Monaco                 | *              | *             |               |
| Montenegro             | 1616.07        | *             |               |
| Netherlands            | 4674.19        | 1934.54       | 1045.87       |

|                                                            |                |               |               |
|------------------------------------------------------------|----------------|---------------|---------------|
| North Macedonia                                            | 955.05         | 256.78        | 241.80        |
| Norway                                                     | 6153.64        | 1798.52       | 1265.61       |
| Poland                                                     | 1121.55        | 608.62        | 374.07        |
| Portugal                                                   | 1602.32        | 688.28        | 601.84        |
| Republic of Moldova                                        | 454.57         | 152.33        | 89.07         |
| Romania                                                    | 1291.77        | 168.22        | 292.59        |
| Russian Federation                                         | 1312.11        | 376.64        | 276.26        |
| San Marino                                                 | *              | *             |               |
| Serbia                                                     | 1273.96        | 384.20        | 275.58        |
| Slovakia                                                   | 1945.41        | 592.49        | 404.56        |
| Slovenia                                                   | 1747.08        | 340.90        | 586.25        |
| Spain                                                      | 3177.01        | 1030.99       | 663.86        |
| Sweden                                                     | 4758.34        | 802.60        | 1081.86       |
| Switzerland                                                | 7487.39        | 2139.49       | 1506.09       |
| Tajikistan                                                 | 219.22         | 57.65         | 46.36         |
| Turkey                                                     | 1110.64        | 310.44        | 217.32        |
| Turkmenistan                                               | 1180.80        | 295.18        | 236.68        |
| Ukraine                                                    | 582.65         | 173.08        | 126.69        |
| United Kingdom of Great Britain and Northern Ireland (the) | 4010.34        | 1182.04       | 857.47        |
| Uzbekistan                                                 | 392.82         | 108.26        | 85.28         |
| <b>South East Asian Region</b>                             | <b>407.56</b>  | <b>115.81</b> | <b>85.18</b>  |
| Bangladesh                                                 | 91.88          | 26.67         | 20.35         |
| Bhutan                                                     | 297.10         | 91.25         | 59.79         |
| Democratic People's Republic of Korea                      | *              | *             |               |
| India                                                      | 239.33         | 64.56         | 51.07         |
| Indonesia                                                  | 332.61         | 96.87         | 69.64         |
| Maldives                                                   | 1272.48        | 344.59        | 267.77        |
| Myanmar                                                    | 270.78         | 81.73         | 54.15         |
| Nepal                                                      | 148.98         | 47.73         | 33.49         |
| Sri Lanka                                                  | 470.29         | 135.11        | 95.95         |
| Thailand                                                   | 648.42         | 174.94        | 134.15        |
| Timor*Leste                                                | 303.70         | 94.66         | 65.43         |
|                                                            |                |               |               |
| <b>Western Pacific Region</b>                              | <b>1224.32</b> | <b>353.67</b> | <b>246.93</b> |
| Australia                                                  | 4462.73        | 1284.74       | 928.99        |
| Brunei Darussalam                                          | 1710.72        | 560.25        | 362.42        |
| Cambodia                                                   | 224.87         | 63.71         | 48.48         |
| China                                                      | 791.19         | 205.47        | 173.59        |
| Cook Islands                                               |                |               |               |
| Fiji                                                       | 310.89         | 91.21         | 69.14         |
| Japan                                                      | 4142.58        | 1278.71       | 835.96        |
| Kiribati                                                   | 226.59         | 49.39         | 51.57         |
| Lao People's Democratic Republic                           | 165.56         | 43.64         | 31.02         |
| Malaysia                                                   | 1052.71        | 302.91        | 221.60        |
| Marshall Islands                                           | 572.18         | 175.33        | 125.69        |
| Micronesia (Federated States of)                           | 402.88         | 122.13        | 76.85         |
| Mongolia                                                   | 483.83         | 150.12        | 96.39         |
| Nauru                                                      | 1351.20        | 438.46        | 218.00        |

|                                         |         |         |        |
|-----------------------------------------|---------|---------|--------|
| New Zealand                             | 3603.52 | 1019.13 | 747.00 |
| Niue                                    |         |         |        |
| Palau                                   | 2044.07 | 598.79  | 373.37 |
| Papua New Guinea                        | 91.67   | 21.73   | 18.80  |
| Philippines                             | 350.20  | 92.51   | 73.12  |
| Republic of Korea                       | 2766.22 | 741.00  | 596.51 |
| Samoa                                   | 341.61  | 98.80   | 65.93  |
| Singapore                               | 3960.74 | 1078.13 | 824.01 |
| Solomon Islands                         | 104.47  | 33.99   | 19.98  |
| Tonga                                   | 328.81  | 80.48   | 65.96  |
| Tuvalu                                  | 653.57  | 176.02  | 140.66 |
| Vanuatu                                 | 81.45   | 35.96   | 20.17  |
| Viet Nam                                | 383.75  | 99.11   | 81.70  |
| <b>World Bank income classification</b> |         |         |        |
| Low                                     | 109.26  | 33.13   | 19.23  |
| Lower-middle                            | 316.44  | 91.62   | 64.03  |
| Upper-middle                            | 929.86  | 265.73  | 178.35 |
| High                                    | 3239.25 | 916.90  | 671.22 |

\*No information

**Table S6. Total number of estimated cases by health outcomes attributed to physical inactivity by country, 2020-2030**

| African Region                   | Cancers     |             |             | Coronary Heart Disease |             |             | Depression  |             |             |
|----------------------------------|-------------|-------------|-------------|------------------------|-------------|-------------|-------------|-------------|-------------|
|                                  | Cost amount | Lower limit | Upper limit | Cost amount            | Lower limit | Upper limit | Cost amount | Lower limit | Upper limit |
| Algeria                          | 12792       | 2764        | 24503       | 132533                 | 92435       | 177437      | 2061219     | 80269       | 4132620     |
| Angola                           | 1898        | 381         | 3909        | 10041                  | 6943        | 13573       | 824234      | 30913       | 1721609     |
| Benin                            | 708         | 108         | 1533        | 3737                   | 2582        | 5058        | 201589      | 7510        | 424413      |
| Botswana                         | 196         | 27          | 479         | 1510                   | 1044        | 2035        | 68676       | 2598        | 142178      |
| Burkina Faso                     | 1178        | 207         | 2526        | 8395                   | 5813        | 11334       | 443534      | 16709       | 921905      |
| Burundi                          | 763         | 106         | 1774        | 4150                   | 2871        | 5604        | 237517      | 8907        | 496109      |
| Cabo Verde                       | 127         | 5           | 291         | 410                    | 284         | 556         | 18588       | 697         | 38706       |
| Cameroon                         | 2710        | 654         | 5042        | 15168                  | 10549       | 20371       | 909782      | 34987       | 1848620     |
| Central Africa Republic          | 196         | 42          | 395         | 1616                   | 1115        | 2189        | 127657      | 4734        | 270040      |
| Chad                             | 1032        | 237         | 1985        | 6280                   | 4353        | 8460        | 395330      | 15007       | 814780      |
| Comoros (The)                    | 40          | 5           | 118         | 336                    | 227         | 452         | 13166       | 487         | 27846       |
| Congo                            | 345         | 71          | 676         | 3810                   | 2649        | 5119        | 244997      | 9410        | 498490      |
| Côte d'Ivoire                    | 2909        | 680         | 5393        | 17916                  | 12494       | 23994       | 790714      | 30755       | 1587373     |
| Democratic Republic of the Congo | 5824        | 996         | 12232       | 41077                  | 28494       | 55328       | 2995028     | 113822      | 6164201     |
| Equatorial Guinea                | 86          | 16          | 155         | 434                    | 301         | 583         | 41869       | 1570        | 87451       |
| Eritrea                          | 361         | 68          | 732         | 2491                   | 1726        | 3359        | 182352      | 6905        | 376775      |
| Eswatini                         | 69          | 12          | 141         | 822                    | 572         | 1106        | 38986       | 1500        | 79325       |
| Ethiopia                         | 7365        | 1549        | 14832       | 26280                  | 18139       | 35601       | 1772837     | 65858       | 3743519     |
| Gabon                            | 217         | 50          | 415         | 1287                   | 893         | 1733        | 79973       | 3050        | 163918      |
| Ghana                            | 2561        | 497         | 5228        | 17502                  | 12126       | 23605       | 812581      | 30726       | 1681801     |
| Gambia (The)                     | 77          | 12          | 173         | 1143                   | 791         | 1540        | 65363       | 2468        | 135553      |
| Guinea                           | 359         | 62          | 726         | 3848                   | 2655        | 5211        | 185593      | 6886        | 392373      |
| Guinea-Bissau                    | 105         | 24          | 195         | 702                    | 483         | 949         | 38008       | 1425        | 79394       |
| Kenya                            | 4519        | 607         | 10574       | 15501                  | 10702       | 20990       | 970065      | 36087       | 2045340     |
| Lesotho                          | 60          | 6           | 136         | 401                    | 273         | 548         | 24208       | 880         | 52500       |
| Liberia                          | 356         | 69          | 695         | 2767                   | 1920        | 3728        | 139657      | 5323        | 286397      |
| Madagascar                       | 2076        | 340         | 4568        | 9312                   | 6442        | 12587       | 575170      | 21555       | 1202363     |
| Malawi                           | 1583        | 135         | 4220        | 5581                   | 3854        | 7558        | 262843      | 9782        | 553865      |

|                                  |                    |                    |                    |                               |                    |                    |                    |                    |                    |
|----------------------------------|--------------------|--------------------|--------------------|-------------------------------|--------------------|--------------------|--------------------|--------------------|--------------------|
| Mali                             | 3778               | 579                | 7712               | 15606                         | 10924              | 20812              | 586200             | 23209              | 1155430            |
| Mauritania                       | 673                | 122                | 1330               | 4305                          | 3009               | 5732               | 134629             | 5345               | 264785             |
| Mauritius                        | 634                | 130                | 1245               | 1661                          | 1151               | 2229               | 52472              | 2024               | 106246             |
| Mozambique                       | 547                | 57                 | 1491               | 3134                          | 2155               | 4277               | 189639             | 6875               | 412187             |
| Namibia                          | 448                | 100                | 850                | 2256                          | 1574               | 3021               | 77204              | 3006               | 154871             |
| Niger                            | 1272               | 268                | 2526               | 7985                          | 5536               | 10768              | 408938             | 15486              | 844955             |
| Nigeria                          | 16950              | 4231               | 31020              | 106316                        | 73887              | 142909             | 4743396            | 181770             | 9674681            |
| Rwanda                           | 719                | 106                | 1565               | 3414                          | 2357               | 4625               | 253933             | 9426               | 536683             |
| Sao Tome and Principe            | 22                 | -                  | 42                 | 83                            | 56                 | 113                | 3088               | 114                | 6508               |
| Senegal                          | 1430               | 245                | 2947               | 8855                          | 6141               | 11939              | 337038             | 12787              | 695025             |
| Seychelles                       | *                  | *                  | *                  | 68                            | 47                 | 93                 | 1569               | 59                 | 3270               |
| Sierra Leone                     | 407                | 87                 | 825                | 2875                          | 1984               | 3898               | 131065             | 4860               | 277252             |
| South Africa                     | 20631              | 4008               | 41458              | 88884                         | 62142              | 118670             | 3134411            | 123449             | 6211665            |
| South Sudan                      | 803                | 124                | 1803               | 3308                          | 2289               | 4469               | 190134             | 7132               | 397135             |
| Togo                             | 303                | 46                 | 676                | 1825                          | 1254               | 2481               | 92867              | 3407               | 199176             |
| Uganda                           | 916                | 93                 | 2399               | 3639                          | 2500               | 4964               | 395202             | 14322              | 859271             |
| United Republic of Tanzania      | 1478               | 180                | 3740               | 7733                          | 5313               | 10539              | 420074             | 15264              | 910399             |
| Zambia                           | *                  | *                  | *                  | 6603                          | 4577               | 8904               | 387209             | 14654              | 800730             |
| Zimbabwe                         | *                  | *                  | *                  | 10156                         | 7054               | 13653              | 307154             | 11763              | 626982             |
|                                  | <b>Cancers</b>     |                    |                    | <b>Coronary Heart Disease</b> |                    |                    | <b>Depression</b>  |                    |                    |
| <b>Region of the Americas</b>    | <b>Cost amount</b> | <b>Lower limit</b> | <b>Upper limit</b> | <b>Cost amount</b>            | <b>Lower limit</b> | <b>Upper limit</b> | <b>Cost amount</b> | <b>Lower limit</b> | <b>Upper limit</b> |
| Antigua and Barbuda              | *                  | *                  | *                  | 265                           | 187                | 358                | 3541               | 138                | 7074               |
| Argentina                        | 33325              | 7019               | 63244              | 71486                         | 50070              | 95249              | 1609903            | 63926              | 3163961            |
| Bahamas (The)                    | 218                | 47                 | 411                | 1317                          | 923                | 1752               | 17813              | 711                | 34869              |
| Barbados                         | 284                | 65                 | 519                | 1625                          | 1140               | 2162               | 16261              | 648                | 31857              |
| Belize                           | 71                 | 15                 | 130                | 838                           | 584                | 1120               | 14346              | 562                | 28663              |
| Bolivia (Plurinational State of) | 2614               | 380                | 5280               | 5238                          | 3655               | 7008               | 446991             | 17462              | 893212             |
| Brazil                           | 145303             | 28360              | 261030             | 244096                        | 171453             | 324236             | 14344734           | 577022             | 27832887           |
| Canada                           | 33413              | 6889               | 65514              | 76659                         | 53320              | 102948             | 1088541            | 41870              | 2211261            |
| Chile                            | 9681               | 1466               | 19884              | 22639                         | 15730              | 30437              | 704562             | 26965              | 1438982            |
| Colombia                         | 29256              | 4868               | 56850              | 80527                         | 56471              | 107144             | 1590063            | 63506              | 3107029            |

|                                     |                    |                    |                    |                               |                    |                    |                    |                    |                    |
|-------------------------------------|--------------------|--------------------|--------------------|-------------------------------|--------------------|--------------------|--------------------|--------------------|--------------------|
| Costa Rica                          | 3392               | 554                | 6548               | 8412                          | 5903               | 11175              | 252774             | 10144              | 491483             |
| Cuba                                | 8604               | 1463               | 17470              | 45748                         | 31965              | 61129              | 716858             | 28143              | 1425261            |
| Dominica                            | *                  | *                  | *                  | 307                           | 215                | 410                | 3345               | 132                | 6540               |
| Dominican Republic (The)            | 3673               | 731                | 7024               | 27643                         | 19333              | 36889              | 536910             | 21185              | 1061926            |
| Ecuador                             | 4832               | 686                | 9975               | 6614                          | 4595               | 8887               | 525744             | 20151              | 1072027            |
| El Salvador                         | 2026               | 352                | 3961               | 7514                          | 5244               | 10058              | 250583             | 9790               | 500734             |
| Grenada                             | *                  | *                  | *                  | 271                           | 186                | 363                | 3553               | 135                | 7215               |
| Guatemala                           | 3335               | 430                | 6778               | 14192                         | 9917               | 18961              | 703934             | 27649              | 1398864            |
| Guyana                              | 196                | 40                 | 334                | 1876                          | 1309               | 2511               | 46382              | 1810               | 92685              |
| Haiti                               | 2720               | 381                | 5536               | 19705                         | 13749              | 26355              | 458040             | 17895              | 915293             |
| Honduras                            | 1747               | 299                | 3453               | 8555                          | 5975               | 11447              | 304123             | 11883              | 607723             |
| Jamaica                             | 1253               | 247                | 2453               | 8133                          | 5667               | 10892              | 99563              | 3865               | 200133             |
| Mexico                              | 30839              | 5856               | 60226              | 131867                        | 91735              | 177057             | 4551485            | 175199             | 9238470            |
| Nicaragua                           | 1634               | 279                | 3207               | 5990                          | 4180               | 8011               | 228266             | 8915               | 456136             |
| Panama                              | 1623               | 285                | 3160               | 5153                          | 3596               | 6894               | 141709             | 5537               | 283175             |
| Paraguay                            | 2313               | 444                | 4494               | 4217                          | 2942               | 5632               | 307097             | 12073              | 609809             |
| Peru                                | 14488              | 2065               | 29150              | 17131                         | 11957              | 22919              | 843255             | 32946              | 1685053            |
| Saint Kitts and Nevis               | *                  | *                  | *                  | 169                           | 161                | 301                | 3034               | 163                | 7864               |
| Saint Lucia                         | 99                 | 17                 | 190                | 702                           | 487                | 932                | 8847               | 351                | 17462              |
| Saint Vicent and the Grenadines     | *                  | *                  | *                  | 380                           | 266                | 506                | 4893               | 189                | 9781               |
| Suriname                            | 210                | 52                 | 382                | 2272                          | 1594               | 3022               | 42417              | 1694               | 82802              |
| Trinidad and Tobago                 | 804                | 164                | 1523               | 6331                          | 4425               | 8455               | 78742              | 3103               | 156049             |
| United States of America            | 382785             | 80743              | 735074             | 774818                        | 542232             | 1033387            | 19043730           | 753296             | 37572999           |
| Uruguay                             | 2316               | 451                | 4639               | 4602                          | 3191               | 6205               | 87117              | 3300               | 180002             |
| Venezuela (Bolivarian Republic of)  | 9668               | 1895               | 18756              | 37820                         | 26346              | 50701              | 1017788            | 39423              | 2052279            |
|                                     | <b>Cancers</b>     |                    |                    | <b>Coronary Heart Disease</b> |                    |                    | <b>Depression</b>  |                    |                    |
| <b>Eastern Mediterranean Region</b> | <b>Cost amount</b> | <b>Lower limit</b> | <b>Upper limit</b> | <b>Cost amount</b>            | <b>Lower limit</b> | <b>Upper limit</b> | <b>Cost amount</b> | <b>Lower limit</b> | <b>Upper limit</b> |
| Afghanistan                         | 6727               | 791                | 14322              | 67342                         | 13330              | 38684              | 1819018            | 71832              | 3595073            |
| Bahrain                             | 312                | 67                 | 613                | 5461                          | 490                | 1426               | 110551             | 4365               | 218487             |
| Djibouti                            | 272                | 44                 | 562                | 1081                          | 423                | 1219               | 56895              | 2247               | 112449             |
| Egypt                               | 21440              | 4091               | 43967              | 304740                        | 47802              | 140655             | 3750040            | 145105             | 7569556            |

|                            |                    |                    |                    |                               |                    |                    |                    |                    |                    |
|----------------------------|--------------------|--------------------|--------------------|-------------------------------|--------------------|--------------------|--------------------|--------------------|--------------------|
| Iran (Islamic Republic of) | 34907              | 4449               | 73584              | 428073                        | 34663              | 101623             | 5629731            | 219023             | 11298892           |
| Iraq                       | 10653              | 2390               | 19746              | 153764                        | 30631              | 87089              | 2565479            | 104419             | 4921216            |
| Jordan                     | 923                | 186                | 1843               | 10194                         | 1862               | 5665               | 190520             | 7023               | 405968             |
| Kuwait                     | 1476               | 346                | 2683               | 23131                         | 2637               | 7314               | 457898             | 19290              | 850730             |
| Lebanon                    | 2015               | 425                | 3920               | 25205                         | 2880               | 8403               | 324472             | 12723              | 645933             |
| Libya                      | 1591               | 349                | 3051               | 22973                         | 3458               | 10082              | 416061             | 16317              | 828247             |
| Morocco                    | 9044               | 1884               | 17685              | 110011                        | 17172              | 50949              | 1815326            | 69405              | 3711614            |
| Oman                       | 810                | 142                | 1583               | 8833                          | 1212               | 3546               | 226401             | 8803               | 454730             |
| Pakistan                   | 37965              | 5652               | 82196              | 391832                        | 65226              | 191052             | 7950284            | 309688             | 15935724           |
| Qatar                      | 335                | 71                 | 636                | 5120                          | 700                | 2035               | 184520             | 7242               | 366956             |
| Saudi Arabia               | 9230               | 2004               | 17068              | 121082                        | 21860              | 62036              | 3004372            | 122605             | 5748961            |
| Somalia                    | 2374               | 433                | 4806               | 11794                         | 5345               | 15511              | 770809             | 30439              | 1523414            |
| Sudan                      | 6268               | 1335               | 12236              | 95486                         | 18553              | 53830              | 1952767            | 77114              | 3859413            |
| Syrian Arab Republic       | 4860               | 1055               | 9237               | 67868                         | 8668               | 25157              | 756346             | 29870              | 1494828            |
| Tunisia                    | 3188               | 653                | 6320               | 45326                         | 6184               | 18205              | 704942             | 27239              | 1425193            |
| United Arab Emirates       | 1302               | 286                | 2434               | 24499                         | 6201               | 17933              | 615954             | 24449              | 1211126            |
| Yemen                      | *                  | *                  | *                  | 66746                         | 12033              | 34919              | 1636718            | 64630              | 3234781            |
|                            | <b>Cancers</b>     |                    |                    | <b>Coronary Heart Disease</b> |                    |                    | <b>Depression</b>  |                    |                    |
| <b>European Region</b>     | <b>Cost amount</b> | <b>Lower limit</b> | <b>Upper limit</b> | <b>Cost amount</b>            | <b>Lower limit</b> | <b>Upper limit</b> | <b>Cost amount</b> | <b>Lower limit</b> | <b>Upper limit</b> |
| Albania                    | 1777               | 182                | 3571               | 6325                          | 4402               | 8493               | 67811              | 2611               | 137457             |
| Andorra                    | *                  | *                  | *                  | 1305                          | 800                | 800                | 30594              | 13197              | 13197              |
| Armenia                    | 1416               | 209                | 2599               | 10910                         | 7566               | 14706              | 76029              | 2880               | 157003             |
| Austria                    | 7871               | 1415               | 13824              | 23373                         | 16268              | 31361              | 321305             | 12405              | 650097             |
| Azerbaijan                 | 4236               | 410                | 8491               | 34147                         | 23760              | 45835              | 259437             | 10000              | 525895             |
| Belarus                    | 4686               | 683                | 9123               | 26253                         | 18115              | 35587              | 232764             | 8632               | 492688             |
| Belgium                    | 18746              | 2782               | 31184              | 31624                         | 22078              | 42286              | 551766             | 21598              | 1100343            |
| Bosnia and Herzegovina     | 2462               | 374                | 4435               | 8954                          | 6219               | 12047              | 92834              | 3544               | 190171             |
| Bulgaria                   | 8809               | 1392               | 14899              | 37261                         | 26055              | 49733              | 293385             | 11565              | 580848             |
| Croatia                    | 5685               | 932                | 9724               | 13769                         | 9587               | 18460              | 169272             | 6552               | 341590             |
| Cyprus                     | 1217               | 236                | 1507               | 2229                          | 1117               | 2143               | 64503              | 1808               | 94300              |
| Czechia                    | 13860              | 2488               | 24163              | 47090                         | 32798              | 63141              | 379295             | 14680              | 765416             |

|                     |        |       |        |        |        |        |         |        |          |
|---------------------|--------|-------|--------|--------|--------|--------|---------|--------|----------|
| Denmark             | 7527   | 1320  | 13740  | 13336  | 10088  | 19419  | 223205  | 9362   | 488227   |
| Estonia             | 1796   | 289   | 3172   | 10469  | 7099   | 13665  | 70415   | 2655   | 138425   |
| Finland             | 3324   | 618   | 11054  | 10384  | 13197  | 25401  | 139703  | 9751   | 508451   |
| France              | 76845  | 14400 | 139885 | 137180 | 101086 | 194611 | 2871992 | 117440 | 6123192  |
| Georgia             | 1531   | 226   | 4665   | 11670  | 13713  | 26399  | 90299   | 5833   | 304224   |
| Germany             | 151813 | 23529 | 196867 | 389863 | 204094 | 392919 | 4816131 | 141301 | 7367307  |
| Greece              | 17334  | 2553  | 23233  | 34527  | 20072  | 38640  | 842559  | 27360  | 1426465  |
| Hungary             | 16686  | 2926  | 23371  | 48720  | 27773  | 53471  | 429588  | 13688  | 713627   |
| Iceland             | 333    | 60    | 598    | 711    | 523    | 1007   | 10060   | 408    | 21390    |
| Ireland             | 5794   | 1003  | 9935   | 9702   | 6448   | 12408  | 243964  | 9018   | 470154   |
| Israel              | 5332   | 938   | 9426   | 11403  | 8375   | 16123  | 362601  | 14781  | 770644   |
| Italy               | 118178 | 18863 | 149991 | 267057 | 142305 | 273966 | 3670804 | 109562 | 5712327  |
| Kazakhstan          | 7668   | 907   | 17765  | 46775  | 36602  | 70466  | 547874  | 23758  | 1238746  |
| Kyrgyzstan          | 834    | 74    | 3742   | 7175   | 10838  | 20866  | 88035   | 7288   | 379877   |
| Latvia              | 2644   | 418   | 4959   | 10797  | 7905   | 15222  | 97578   | 3964   | 206731   |
| Lithuania           | 3268   | 496   | 7074   | 14189  | 11500  | 22146  | 137704  | 6178   | 322256   |
| Luxembourg          | 514    | 95    | 1003   | 835    | 635    | 1223   | 21279   | 895    | 46701    |
| Malta               | 717    | 129   | 933    | 1123   | 592    | 1143   | 21165   | 628    | 32724    |
| Monaco              | *      | *     | *      | 96     | 71     | 136    | 1868    | 76     | 3964     |
| Montenegro          | 536    | 85    | 971    | 1719   | 1267   | 2432   | 19283   | 786    | 40986    |
| Netherlands         | 26010  | 4291  | 44515  | 54229  | 37924  | 73008  | 724880  | 28081  | 1464134  |
| North Macedonia     | 1565   | 244   | 2721   | 5437   | 3791   | 7305   | 62796   | 2431   | 126769   |
| Norway              | 6631   | 1183  | 11051  | 11063  | 7567   | 14566  | 198573  | 7552   | 393742   |
| Poland              | 45010  | 6958  | 76245  | 57104  | 38150  | 73450  | 991565  | 36859  | 1921680  |
| Portugal            | 18222  | 3043  | 23714  | 16797  | 8567   | 16497  | 890912  | 25494  | 1329142  |
| Republic of Moldova | 1087   | 168   | 5309   | 6869   | 12486  | 24034  | 60519   | 6016   | 313602   |
| Romania             | 23495  | 3777  | 36253  | 79058  | 48749  | 93849  | 684928  | 23544  | 1227741  |
| Russian Federation  | 79383  | 11910 | 269759 | 396143 | 489190 | 941782 | 3092895 | 209864 | 10942069 |
| San Marino          | *      | *     | *      | 66     | 49     | 94     | 1572    | 66     | 3335     |
| Serbia              | 12178  | 2104  | 16527  | 48174  | 26813  | 51621  | 372554  | 11597  | 604743   |
| Slovakia            | 7682   | 1288  | 12423  | 18933  | 11830  | 22776  | 196289  | 6835   | 356434   |



|                                                            |                    |                    |                    |                               |                    |                    |                    |                    |                    |
|------------------------------------------------------------|--------------------|--------------------|--------------------|-------------------------------|--------------------|--------------------|--------------------|--------------------|--------------------|
| Slovenia                                                   | 2890               | 494                | 4881               | 7206                          | 4858               | 9349               | 88761              | 3327               | 173491             |
| Spain                                                      | 53015              | 8771               | 100622             | 92252                         | 73986              | 142432             | 2421690            | 107564             | 5608257            |
| Sweden                                                     | 7964               | 1397               | 17933              | 18518                         | 17114              | 32943              | 375286             | 19156              | 998590             |
| Switzerland                                                | 7323               | 1192               | 16121              | 14675                         | 13235              | 25482              | 309019             | 15396              | 802720             |
| Tajikistan                                                 | 1884               | 157                | 4188               | 17458                         | 12864              | 24767              | 186698             | 7634               | 398044             |
| Turkey                                                     | 46634              | 6413               | 80959              | 177014                        | 125190             | 241010             | 3532475            | 138777             | 7235666            |
| Turkmenistan                                               | 1670               | 187                | 3750               | 13390                         | 9836               | 18936              | 126978             | 5177               | 269864             |
| Ukraine                                                    | 23736              | 3531               | 70024              | 205440                        | 222354             | 428074             | 1564613            | 93239              | 4861530            |
| United Kingdom of Great Britain and Northern Ireland (the) | 92218              | 17051              | 147467             | 159347                        | 22686              | 186688             | 3756262            | 127502             | 6647806            |
| Uzbekistan                                                 | 4947               | 618                | 15505              | 57603                         | 13355              | 123055             | 561029             | 34263              | 1786482            |
|                                                            | <b>Cancers</b>     |                    |                    | <b>Coronary Heart Disease</b> |                    |                    | <b>Depression</b>  |                    |                    |
| <b>South-East Asia Region</b>                              | <b>Cost amount</b> | <b>Lower limit</b> | <b>Upper limit</b> | <b>Cost amount</b>            | <b>Lower limit</b> | <b>Upper limit</b> | <b>Cost amount</b> | <b>Lower limit</b> | <b>Upper limit</b> |
| Bangladesh                                                 | 33628              | 2587               | 83685              | 280906                        | 195294             | 377425             | 7009681            | 269085             | 14270033           |
| Bhutan                                                     | 68                 | *                  | 169                | 1049                          | 1049               | 1049               | 16414              | 16414              | 16414              |
| Democratic People's Republic of Korea                      | 11012              | 1479               | 23426              | 25100                         | 17397              | 33845              | 473582             | 17921              | 979346             |
| India                                                      | 257723             | 38105              | 550835             | 3345041                       | 2333427            | 4477331            | 55440933           | 2161185            | 111041475          |
| Indonesia                                                  | 32307              | 7946               | 60285              | 85182                         | 59051              | 114822             | 3651996            | 138371             | 7541557            |
| Maldives                                                   | 58                 | 14                 | 97                 | 315                           | 219                | 419                | 12812              | 492                | 25912              |
| Myanmar                                                    | 5708               | 544                | 13700              | 15856                         | 10917              | 21538              | 298906             | 10984              | 639281             |
| Nepal                                                      | 1344               | 165                | 2958               | 22737                         | 15678              | 30830              | 663433             | 24551              | 1407236            |
| Sri Lanka                                                  | 5343               | 794                | 11800              | 23404                         | 16283              | 31423              | 500780             | 19276              | 1016468            |
| Thailand                                                   | 22251              | 4244               | 45112              | 64580                         | 44822              | 86942              | 1634390            | 62238              | 3356371            |
| Timor-Leste                                                | 78                 | 10                 | 141                | 450                           | 314                | 608                | 13953              | 524                | 29212              |
|                                                            | <b>Cancers</b>     |                    |                    | <b>Coronary Heart Disease</b> |                    |                    | <b>Depression</b>  |                    |                    |
| <b>Western Pacific Region</b>                              | <b>Cost amount</b> | <b>Lower limit</b> | <b>Upper limit</b> | <b>Cost amount</b>            | <b>Lower limit</b> | <b>Upper limit</b> | <b>Cost amount</b> | <b>Lower limit</b> | <b>Upper limit</b> |
| Australia                                                  | 23946              | 4873               | 42126              | 90413                         | 62950              | 121285             | 1200477            | 46380              | 2427013            |
| Brunei Darussalam                                          | 182                | 34                 | 335                | 258                           | 178                | 345                | 6111               | 235                | 12459              |
| Cambodia                                                   | 855                | 144                | 1729               | 3843                          | 2645               | 5222               | 136673             | 5019               | 292488             |
| China                                                      | 568870             | 51403              | 1303397            | 1050261                       | 724568             | 1423517            | 19493977           | 722682             | 41262249           |
| Cook Islands                                               | *                  | *                  | *                  | 18                            | 13                 | 25                 | 321                | 10                 | 665                |
| Fiji                                                       | 76                 | 4                  | 151                | 549                           | 377                | 739                | 12336              | 461                | 25857              |

|                                  |        |       |        |        |        |        |         |        |         |
|----------------------------------|--------|-------|--------|--------|--------|--------|---------|--------|---------|
| Japan                            | 332430 | 35648 | 650558 | 317178 | 221435 | 424159 | 3893837 | 152346 | 7769115 |
| Kiribati                         | *      | *     | *      | 5490   | 3839   | 7315   | 183568  | 7269   | 361823  |
| Lao People's Democratic Republic | 947    | 127   | 1987   | 16720  | 11548  | 22630  | 541863  | 20202  | 1139448 |
| Malaysia                         | 11372  | 2360  | 20117  | 38211  | 26725  | 51003  | 1216539 | 47984  | 2407307 |
| Marshall Islands                 | *      | *     | *      | 56     | 39     | 72     | 1655    | 66     | 3244    |
| Micronesia (Federated States of) | 223    | 38    | 414    | 92     | 65     | 125    | 2588    | 103    | 5154    |
| Mongolia                         | 864    | 36    | 2094   | 4962   | 3431   | 6708   | 79841   | 2995   | 166762  |
| Nauru                            | *      | *     | *      | 9      | 3      | 14     | 286     | 12     | 568     |
| New Zealand                      | 5737   | 1204  | 10137  | 15991  | 11206  | 21296  | 202100  | 8042   | 396420  |
| Niue                             | *      | *     | *      | 3      | -      | 5      | 57      | -      | 115     |
| Palau                            | *      | *     | *      | 31     | 21     | 42     | 676     | 25     | 1332    |
| Papua New Guinea                 | 841    | 131   | 1721   | 2977   | 2057   | 4033   | 107803  | 4006   | 227707  |
| Philippines                      | 33109  | 7483  | 58592  | 145034 | 101484 | 193469 | 3001831 | 118655 | 5926927 |
| Republic of Korea                | 58592  | 5744  | 116227 | 66077  | 46130  | 88370  | 1567186 | 61300  | 3127698 |
| Samoa                            | 30     | 5     | 61     | 77     | 55     | 105    | 1715    | 64     | 3645    |
| Singapore                        | 5552   | 1112  | 9996   | 9598   | 6707   | 12829  | 162036  | 6354   | 322489  |
| Solomon Islands                  | 41     | 10    | 88     | 234    | 164    | 317    | 7961    | 299    | 16651   |
| Tonga                            | *      | *     | *      | 59     | 40     | 80     | 1065    | 39     | 2231    |
| Tuvalu                           | *      | *     | *      | 17     | 9      | 21     | 371     | 17     | 734     |
| Vanuatu                          | 17     | *     | 16     | 65     | 43     | 88     | 1657    | 59     | 3577    |
| Viet Nam                         | 32018  | 4074  | 65813  | 71264  | 49479  | 95895  | 1518825 | 57953  | 3112188 |

\*No data

(continued from previous page)

| African Region | Hypertension |             |             | Stroke      |             |             | Type 2 Diabetes |             |             |
|----------------|--------------|-------------|-------------|-------------|-------------|-------------|-----------------|-------------|-------------|
|                | Cost amount  | Lower limit | Upper limit | Cost amount | Lower limit | Upper limit | Cost amount     | Lower limit | Upper limit |
| Algeria        | 1405861      | 709946      | 2088161     | 43295       | 21176       | 62041       | 104891          | 69189       | 139255      |
| Angola         | 392690       | 197435      | 585803      | 8093        | 3908        | 11736       | 15908           | 10403       | 21294       |
| Benin          | 132830       | 66726       | 198304      | 2979        | 1434        | 4330        | 4871            | 3182        | 6536        |
| Botswana       | 45061        | 22674       | 67160       | 1172        | 565         | 1697        | 2628            | 1721        | 3515        |
| Burkina Faso   | 314055       | 157977      | 468263      | 5332        | 2577        | 7722        | 10714           | 7017        | 14329       |

|                                  |         |        |         |       |       |        |       |       |        |
|----------------------------------|---------|--------|---------|-------|-------|--------|-------|-------|--------|
| Burundi                          | 143799  | 72298  | 214515  | 2937  | 1414  | 4259   | 4173  | 2733  | 5586   |
| Cabo Verde                       | 12245   | 6160   | 18265   | 249   | 121   | 361    | 535   | 350   | 717    |
| Cameroon                         | 451808  | 227821 | 672064  | 13097 | 6378  | 18842  | 20532 | 13506 | 27334  |
| Central Africa Republic          | 55546   | 27894  | 82967   | 1494  | 717   | 2176   | 2666  | 1739  | 3574   |
| Chad                             | 263835  | 132833 | 393046  | 5069  | 2455  | 7325   | 7562  | 4958  | 10093  |
| Comoros (The)                    | 9636    | 4838   | 14394   | 260   | 123   | 377    | 266   | 176   | 356    |
| Congo                            | 106342  | 53612  | 158206  | 3022  | 1472  | 4351   | 5924  | 3899  | 7897   |
| Côte d'Ivoire                    | 606380  | 306174 | 900800  | 14772 | 7222  | 21180  | 22940 | 15128 | 30462  |
| Democratic Republic of the Congo | 1364238 | 686953 | 2032052 | 28344 | 13738 | 40928  | 61834 | 40568 | 82526  |
| Equatorial Guinea                | 22016   | 11071  | 32847   | 307   | 150   | 445    | 798   | 524   | 1073   |
| Eritrea                          | 60092   | 30243  | 89544   | 2197  | 1063  | 3174   | 3465  | 2268  | 4628   |
| Eswatini                         | 26641   | 13431  | 39632   | 632   | 312   | 912    | 1481  | 978   | 1975   |
| Ethiopia                         | 1315670 | 660761 | 1964800 | 14499 | 6970  | 21092  | 24462 | 15968 | 32808  |
| Gabon                            | 44931   | 22634  | 66893   | 923   | 449   | 1328   | 2194  | 1440  | 2921   |
| Ghana                            | 34854   | 17543  | 51944   | 16238 | 7856  | 23482  | 23513 | 15406 | 31418  |
| Gambia (The)                     | 305459  | 153391 | 456221  | 3150  | 1514  | 4582   | 4179  | 2728  | 5607   |
| Guinea                           | 179135  | 90065  | 267224  | 710   | 340   | 1029   | 890   | 584   | 1193   |
| Guinea-Bissau                    | 23922   | 12013  | 35722   | 11591 | 5573  | 16854  | 15381 | 10044 | 20623  |
| Kenya                            | 228895  | 114662 | 342696  | 348   | 165   | 510    | 607   | 397   | 819    |
| Lesotho                          | 48834   | 24601  | 72712   | 1834  | 890   | 2647   | 3819  | 2508  | 5092   |
| Liberia                          | 68685   | 34527  | 102466  | 12367 | 5963  | 17942  | 9689  | 6338  | 12968  |
| Madagascar                       | 311021  | 156236 | 464383  | 3798  | 1825  | 5515   | 6652  | 4344  | 8918   |
| Malawi                           | 509186  | 257643 | 754850  | 11494 | 5656  | 16383  | 17747 | 11748 | 23480  |
| Mali                             | 588877  | 298041 | 872761  | 2861  | 1407  | 4076   | 3246  | 2152  | 4293   |
| Mauritania                       | 119849  | 60457  | 178211  | 1461  | 715   | 2099   | 6103  | 4020  | 8119   |
| Mauritius                        | 10701   | 5357   | 16025   | 3519  | 1677  | 5161   | 3628  | 2354  | 4891   |
| Mozambique                       | 713995  | 360539 | 1060575 | 1564  | 765   | 2243   | 2928  | 1933  | 3892   |
| Namibia                          | 48010   | 24164  | 71539   | 6091  | 2952  | 8809   | 7109  | 4661  | 9495   |
| Niger                            | 462272  | 232999 | 687906  | 73671 | 35823 | 106113 | 97720 | 64226 | 130185 |
| Nigeria                          | 1747324 | 877472 | 2609652 | 2730  | 1312  | 3975   | 3965  | 2589  | 5317   |
| Rwanda                           | 133970  | 67293  | 200032  | 91    | 45    | 137    | 97    | 62    | 133    |

|                                  |                     |                    |                    |                    |                    |                    |                        |                    |                    |
|----------------------------------|---------------------|--------------------|--------------------|--------------------|--------------------|--------------------|------------------------|--------------------|--------------------|
| Sao Tome and Principe            | 3309                | 1667               | 4932               | 5886               | 2852               | 8504               | 12626                  | 8280               | 16862              |
| Senegal                          | 230628              | 115960             | 344023             | 83                 | 42                 | 117                | 232                    | 150                | 310                |
| Seychelles                       | 1704                | 855                | 2542               | 2339               | 1125               | 3399               | 1997                   | 1308               | 2682               |
| Sierra Leone                     | 237501              | 120095             | 352301             | 55102              | 27067              | 78688              | 125651                 | 83095              | 166418             |
| South Africa                     | 1185471             | 596023             | 1768450            | 2707               | 1303               | 3926               | 3454                   | 2259               | 4626               |
| South Sudan                      | *                   | *                  | *                  | 848                | 410                | 1225               | 1086                   | 711                | 1453               |
| Togo                             | 59499               | 29837              | 88989              | 1552               | 744                | 2271               | 1584                   | 1031               | 2132               |
| Uganda                           | 153170              | 76709              | 229376             | 3007               | 1433               | 4416               | 5607                   | 3638               | 7559               |
| United Republic of Tanzania      | 252149              | 126322             | 377491             | 5614               | 2676               | 8227               | 6982                   | 4534               | 9411               |
| Zambia                           | 234238              | 117891             | 349074             | 4778               | 2312               | 6910               | 8559                   | 5611               | 11435              |
| Zimbabwe                         | 277779              | 139996             | 413396             | 6332               | 3079               | 9124               | 15043                  | 9885               | 20039              |
|                                  | <b>Hypertension</b> |                    |                    | <b>Stroke</b>      |                    |                    | <b>Type 2 Diabetes</b> |                    |                    |
| <b>Region of the Americas</b>    | <b>Cost amount</b>  | <b>Lower limit</b> | <b>Upper limit</b> | <b>Cost amount</b> | <b>Lower limit</b> | <b>Upper limit</b> | <b>Cost amount</b>     | <b>Lower limit</b> | <b>Upper limit</b> |
| Antigua and Barbuda              | 3859                | 1951               | 5731               | 73                 | 35                 | 104                | 295                    | 197                | 391                |
| Argentina                        | 2032980             | 1029020            | 3012786            | 38122              | 18783              | 54293              | 97286                  | 64453              | 128626             |
| Bahamas (The)                    | 16283               | 8245               | 24119              | 360                | 180                | 514                | 1280                   | 848                | 1691               |
| Barbados                         | 17783               | 9005               | 26343              | 399                | 198                | 570                | 1271                   | 841                | 1684               |
| Belize                           | 9528                | 4815               | 14150              | 194                | 97                 | 278                | 727                    | 481                | 966                |
| Bolivia (Plurinational State of) | 237056              | 119756             | 351972             | 6055               | 2964               | 8664               | 16939                  | 11181              | 22472              |
| Brazil                           | 10758934            | 5454263            | 15920090           | 265597             | 131482             | 376777             | 549724                 | 365243             | 724819             |
| Canada                           | 964784              | 486498             | 1435074            | 24803              | 12078              | 35682              | 52295                  | 34401              | 69612              |
| Chile                            | 550944              | 277649             | 819970             | 10868              | 5278               | 15655              | 35247                  | 23161              | 46965              |
| Colombia                         | 1785523             | 904393             | 2644277            | 36573              | 18055              | 51998              | 132456                 | 87866              | 174912             |
| Costa Rica                       | 198500              | 100604             | 293802             | 3629               | 1792               | 5150               | 14854                  | 9865               | 19595              |
| Cuba                             | 513958              | 259791             | 762677             | 13849              | 6794               | 19793              | 35683                  | 23582              | 47293              |
| Dominica                         | *                   | *                  | *                  | 88                 | 43                 | 124                | 314                    | 206                | 417                |
| Dominican Republic (The)         | 354265              | 179181             | 525389             | 10543              | 5182               | 15047              | 15953                  | 10554              | 21118              |
| Ecuador                          | 324563              | 163595             | 482966             | 8133               | 3958               | 11717              | 24725                  | 16251              | 32935              |
| El Salvador                      | 162776              | 82227              | 241684             | 3397               | 1663               | 4867               | 13591                  | 8969               | 18025              |
| Grenada                          | 3395                | 1713               | 5051               | 84                 | 40                 | 121                | 301                    | 198                | 401                |
| Guatemala                        | 391989              | 198154             | 581651             | 7437               | 3646               | 10625              | 39440                  | 26068              | 52267              |

|                                     |                     |                    |                    |                    |                    |                    |                        |                    |                    |
|-------------------------------------|---------------------|--------------------|--------------------|--------------------|--------------------|--------------------|------------------------|--------------------|--------------------|
| Guyana                              | 22514               | 11375              | 33428              | 6779               | 3322               | 9707               | 2528                   | 1669               | 3354               |
| Haiti                               | 300927              | 152020             | 446805             | 10367              | 5079               | 14842              | 25980                  | 17148              | 34465              |
| Honduras                            | 219931              | 111104             | 326545             | 3766               | 1841               | 5389               | 18324                  | 12098              | 24313              |
| Jamaica                             | 97032               | 48987              | 144166             | 2625               | 1284               | 3764               | 7875                   | 5190               | 10465              |
| Mexico                              | 2944259             | 1484786            | 4379075            | 59132              | 28799              | 85048              | 323321                 | 212728             | 430327             |
| Nicaragua                           | 158018              | 79827              | 234623             | 2741               | 1339               | 3925               | 13340                  | 8806               | 17697              |
| Panama                              | 120374              | 60815              | 178729             | 2834               | 1385               | 4058               | 10022                  | 6616               | 13295              |
| Paraguay                            | 230066              | 116311             | 341353             | 5704               | 2801               | 8154               | 12057                  | 7970               | 15976              |
| Peru                                | 600062              | 303141             | 890964             | 16781              | 8216               | 24023              | 40702                  | 26870              | 54003              |
| Saint Kitts and Nevis               | *                   | *                  | *                  | 58                 | 40                 | 114                | 187                    | 166                | 334                |
| Saint Lucia                         | 9910                | 5014               | 14691              | 216                | 105                | 303                | 846                    | 562                | 1120               |
| Saint Vicent and the Grenadines     | 4183                | 2115               | 6211               | 120                | 60                 | 172                | 425                    | 277                | 563                |
| Suriname                            | 24049               | 12181              | 35615              | 821                | 403                | 1168               | 2457                   | 1631               | 3247               |
| Trinidad and Tobago                 | 73320               | 37075              | 108760             | 1579               | 773                | 2251               | 6694                   | 4428               | 8864               |
| United States of America            | 10851048            | 5489857            | 16088046           | 360457             | 177337             | 513999             | 1130464                | 748292             | 1495835            |
| Uruguay                             | 94098               | 47361              | 140212             | 2516               | 1221               | 3640               | 3334                   | 2187               | 4459               |
| Venezuela (Bolivarian Republic of)  | 733784              | 370316             | 1090596            | 18874              | 9214               | 27093              | 62847                  | 41407              | 83534              |
|                                     | <b>Hypertension</b> |                    |                    | <b>Stroke</b>      |                    |                    | <b>Type 2 Diabetes</b> |                    |                    |
| <b>Eastern Mediterranean Region</b> | <b>Cost amount</b>  | <b>Lower limit</b> | <b>Upper limit</b> | <b>Cost amount</b> | <b>Lower limit</b> | <b>Upper limit</b> | <b>Cost amount</b>     | <b>Lower limit</b> | <b>Upper limit</b> |
| Afghanistan                         | 1060300             | 536326             | 1572339            | 27114              | 13330              | 38684              | 70155                  | 46424              | 92865              |
| Bahrain                             | 47657               | 24109              | 70671              | 997                | 490                | 1426               | 10902                  | 7216               | 14430              |
| Djibouti                            | 2841236             | 1433708            | 4223300            | 97960              | 47802              | 140655             | 149961                 | 98779              | 199368             |
| Egypt                               | 2295739             | 1159188            | 3410307            | 70894              | 34663              | 101623             | 187533                 | 123673             | 249025             |
| Iran (Islamic Republic of)          | 1375712             | 698423             | 2032813            | 61609              | 30631              | 87089              | 138917                 | 92541              | 182706             |
| Iraq                                | 75886               | 38076              | 113427             | 3884               | 1862               | 5665               | 9046                   | 5892               | 12148              |
| Jordan                              | 240622              | 122679             | 354088             | 5232               | 2637               | 7314               | 29685                  | 19928              | 38768              |
| Kuwait                              | 224771              | 113601             | 333589             | 5875               | 2880               | 8403               | 14172                  | 9364               | 18790              |
| Lebanon                             | 226038              | 114238             | 335472             | 7053               | 3458               | 10082              | 23078                  | 15245              | 30596              |
| Libya                               | 1044258             | 526202             | 1554358            | 35349              | 17172              | 50949              | 65948                  | 43324              | 87902              |
| Morocco                             | 122305              | 61750              | 181694             | 2472               | 1212               | 3546               | 9511                   | 6272               | 12636              |
| Oman                                | 7045290             | 3557903            | 10464239           | 133339             | 65226              | 191052             | 308411                 | 203451             | 409436             |

|                        |                     |                    |                    |                    |                    |                    |                        |                    |                    |
|------------------------|---------------------|--------------------|--------------------|--------------------|--------------------|--------------------|------------------------|--------------------|--------------------|
| Pakistan               | 87982               | 44471              | 130560             | 1422               | 700                | 2035               | 17081                  | 11290              | 22644              |
| Qatar                  | 1590473             | 807705             | 2349433            | 43925              | 21860              | 62036              | 167683                 | 111763             | 220420             |
| Saudi Arabia           | 455370              | 230337             | 675279             | 10875              | 5345               | 15511              | 14376                  | 9515               | 19031              |
| Somalia                | 1146158             | 579755             | 1699657            | 37733              | 18553              | 53830              | 74202                  | 49100              | 98222              |
| Sudan                  | 699882              | 354019             | 1037866            | 17632              | 8668               | 25157              | 38342                  | 25370              | 50753              |
| Syrian Arab Republic   | 227763              | 114910             | 338610             | 12675              | 6184               | 18205              | 32548                  | 21429              | 43282              |
| Tunisia                | 515706              | 261020             | 764297             | 12591              | 6201               | 17933              | 50913                  | 33727              | 67319              |
| United Arab Emirates   | *                   | *                  | *                  | 24474              | 12033              | 34919              | 35737                  | 23648              | 47303              |
| Yemen                  | 35481               | 17947              | 52617              | 854                | 423                | 1219               | 1224                   | 807                | 1618               |
|                        | <b>Hypertension</b> |                    |                    | <b>Stroke</b>      |                    |                    | <b>Type 2 Diabetes</b> |                    |                    |
| <b>European Region</b> | <b>Cost amount</b>  | <b>Lower limit</b> | <b>Upper limit</b> | <b>Cost amount</b> | <b>Lower limit</b> | <b>Upper limit</b> | <b>Cost amount</b>     | <b>Lower limit</b> | <b>Upper limit</b> |
| Albania                | 138738              | 69974              | 206317             | 3846               | 1877               | 5533               | 3149                   | 2072               | 4190               |
| Andorra                | *                   | *                  | *                  | 488                | 300                | 300                | 1236                   | 846                | 846                |
| Armenia                | 93809               | 47225              | 139786             | 2132               | 1034               | 3086               | 4188                   | 2746               | 5594               |
| Austria                | 400331              | 201957             | 595216             | 8132               | 3965               | 11683              | 15806                  | 10405              | 21025              |
| Azerbaijan             | 320105              | 161450             | 476033             | 10683              | 5204               | 15364              | 16481                  | 10845              | 21929              |
| Belarus                | 233528              | 117258             | 348828             | 8398               | 4036               | 12226              | 4299                   | 2810               | 5773               |
| Belgium                | 507907              | 256646             | 753955             | 10920              | 5353               | 15624              | 22930                  | 15143              | 30408              |
| Bosnia and Herzegovina | 175401              | 88366              | 261137             | 6036               | 2930               | 8706               | 8952                   | 5877               | 11937              |
| Bulgaria               | 564366              | 285415             | 837073             | 25245              | 12404              | 36041              | 18034                  | 11924              | 23881              |
| Croatia                | 298931              | 150846             | 444328             | 6976               | 3405               | 10021              | 10691                  | 7043               | 14211              |
| Cyprus                 | 60532               | 30665              | 89634              | 1069               | 376                | 1099               | 4767                   | 2249               | 4534               |
| Czechia                | 625262              | 315522             | 929386             | 14038              | 6851               | 20155              | 3410                   | 2249               | 4534               |
| Denmark                | 235019              | 118505             | 349592             | 4496               | 2383               | 7007               | 8289                   | 5931               | 11968              |
| Estonia                | 79153               | 39949              | 117621             | 1508               | 717                | 2106               | 1821                   | 1166               | 2358               |
| Finland                | 131899              | 66278              | 196879             | 3463               | 3084               | 9077               | 6860                   | 8266               | 16684              |
| France                 | 2837885             | 1431306            | 4220371            | 47209              | 24374              | 71712              | 70615                  | 49227              | 99348              |
| Georgia                | 120303              | 60477              | 179498             | 4003               | 3296               | 9698               | 4671                   | 5206               | 10500              |
| Germany                | 5366928             | 2717012            | 7952202            | 114153             | 41872              | 123191             | 327886                 | 162029             | 326989             |
| Greece                 | 578634              | 292555             | 858457             | 16649              | 6780               | 19948              | 22840                  | 12544              | 25315              |
| Hungary                | 766037              | 387390             | 1136228            | 20320              | 8117               | 23881              | 29241                  | 15746              | 31775              |

|                     |         |         |         |        |        |        |        |        |        |
|---------------------|---------|---------|---------|--------|--------|--------|--------|--------|--------|
| Iceland             | 11536   | 5818    | 17153   | 212    | 110    | 324    | 518    | 364    | 732    |
| Ireland             | 174128  | 87911   | 258704  | 2751   | 1280   | 3766   | 8424   | 5295   | 10675  |
| Israel              | 199743  | 100746  | 297045  | 4490   | 2313   | 6800   | 13816  | 9598   | 19371  |
| Italy               | 4171721 | 2111448 | 6182651 | 77737  | 29026  | 85396  | 202874 | 102058 | 205964 |
| Kazakhstan          | 603201  | 304070  | 897516  | 19033  | 10437  | 30706  | 28831  | 21355  | 43093  |
| Kyrgyzstan          | 81228   | 40783   | 121340  | 2221   | 2350   | 6908   | 2359   | 3381   | 6825   |
| Latvia              | 119409  | 60228   | 177571  | 4223   | 2166   | 6370   | 2531   | 1755   | 3538   |
| Lithuania           | 148924  | 75051   | 221654  | 5105   | 2900   | 8535   | 2601   | 1994   | 4030   |
| Luxembourg          | 22824   | 11507   | 33947   | 344    | 184    | 538    | 1535   | 1102   | 2224   |
| Malta               | 24927   | 12615   | 36940   | 506    | 186    | 550    | 1550   | 776    | 1562   |
| Monaco              | *       | *       | *       | 45     | 23     | 66     | 62     | 51     | 93     |
| Montenegro          | 32834   | 16560   | 48823   | 1285   | 659    | 1944   | 1543   | 1070   | 2163   |
| Netherlands         | 702056  | 353871  | 1044699 | 14524  | 7116   | 20935  | 25892  | 17137  | 34581  |
| North Macedonia     | *       | *       | *       | 4770   | 2332   | 6867   | 6682   | 4411   | 8902   |
| Norway              | 216852  | 109446  | 322273  | 5066   | 2427   | 7140   | 10368  | 6707   | 13535  |
| Poland              | 2341203 | 1181904 | 3478537 | 49013  | 22947  | 67506  | 88617  | 55986  | 112985 |
| Portugal            | 790786  | 400472  | 1171313 | 15733  | 5624   | 16542  | 41907  | 20174  | 40711  |
| Republic of Moldova | 85772   | 43034   | 128216  | 2280   | 2906   | 8546   | 2109   | 3630   | 7334   |
| Romania             | 1366140 | 690250  | 2028121 | 48005  | 20739  | 61021  | 34146  | 19895  | 40153  |
| Russian Federation  | 4304836 | 2163405 | 6424633 | 159063 | 137636 | 404916 | 90247  | 105674 | 213262 |
| San Marino          | *       | *       | *       | 25     | 15     | 43     | 57     | 41     | 80     |
| Serbia              | 661834  | 334792  | 981385  | 24612  | 9600   | 28240  | 29344  | 15426  | 31131  |
| Slovakia            | 344259  | 173912  | 511145  | 8675   | 3799   | 11177  | 11264  | 6653   | 13426  |
| Slovenia            | 141984  | 71676   | 210977  | 2376   | 1123   | 3298   | 4208   | 2681   | 5412   |
| Spain               | 1753772 | 883878  | 2610008 | 33493  | 18827  | 55374  | 96808  | 73487  | 148308 |
| Sweden              | 315961  | 159066  | 470726  | 7391   | 4786   | 14080  | 13297  | 11639  | 23491  |
| Switzerland         | 257316  | 129566  | 383283  | 4772   | 3015   | 8869   | 12664  | 10812  | 21830  |
| Tajikistan          | 201283  | 101518  | 299340  | 4361   | 2252   | 6625   | 11542  | 8045   | 16241  |
| Turkey              | 2235399 | 1127865 | 3323143 | 76527  | 37921  | 111566 | 144478 | 96650  | 195042 |
| Turkmenistan        | 154341  | 77843   | 229521  | 5627   | 2895   | 8519   | 5815   | 4041   | 8153   |
| Ukraine             | 1589142 | 799215  | 2369937 | 51711  | 39217  | 115377 | 30726  | 31519  | 63610  |

|                                                            |                     |                    |                    |                    |                    |                    |                        |                    |                    |
|------------------------------------------------------------|---------------------|--------------------|--------------------|--------------------|--------------------|--------------------|------------------------|--------------------|--------------------|
| United Kingdom of Great Britain and Northern Ireland (the) | 2552633             | 1289917            | 3789003            | 53199              | 22686              | 66738              | 197657                 | 113670             | 229394             |
| Uzbekistan                                                 | 575691              | 289486             | 858666             | 17182              | 13355              | 39302              | 30234                  | 31804              | 64180              |
|                                                            | <b>Hypertension</b> |                    |                    | <b>Stroke</b>      |                    |                    | <b>Type 2 Diabetes</b> |                    |                    |
| <b>South-East Asia Region</b>                              | <b>Cost amount</b>  | <b>Lower limit</b> | <b>Upper limit</b> | <b>Cost amount</b> | <b>Lower limit</b> | <b>Upper limit</b> | <b>Cost amount</b>     | <b>Lower limit</b> | <b>Upper limit</b> |
| Bangladesh                                                 | 4032467             | 2032912            | 5999489            | 102022             | 49636              | 146859             | 170101                 | 111849             | 226534             |
| Bhutan                                                     | 57877               | 28032              | 83633              | 266                | 130                | 379                | 822                    | 822                | 822                |
| Democratic People's Republic of Korea                      | 548306              | 275958             | 817116             | 41409              | 20042              | 59883              | 25975                  | 17024              | 34702              |
| India                                                      | 47173010            | 23824659           | 70059195           | 849183             | 415517             | 1216462            | 2588469                | 1707827            | 3435785            |
| Indonesia                                                  | 5944645             | 2992339            | 8857717            | 299224             | 144876             | 432526             | 266970                 | 175032             | 356538             |
| Maldives                                                   | 14130               | 7128               | 21006              | 249                | 122                | 354                | 646                    | 428                | 859                |
| Myanmar                                                    | 584679              | 293275             | 874229             | 16872              | 8077               | 24631              | 36859                  | 24001              | 49556              |
| Nepal                                                      | 386425              | 193986             | 577329             | 5027               | 2413               | 7326               | 16734                  | 10912              | 22463              |
| Sri Lanka                                                  | 697110              | 351550             | 1036831            | 19063              | 9284               | 27416              | 73419                  | 48308              | 97717              |
| Thailand                                                   | 2263961             | 1140271            | 3371417            | 62884              | 30502              | 90750              | 116695                 | 76596              | 155680             |
| Timor-Leste                                                | 16670               | 8381               | 24874              | 767                | 369                | 1107               | 873                    | 573                | 1173               |
|                                                            | <b>Hypertension</b> |                    |                    | <b>Stroke</b>      |                    |                    | <b>Type 2 Diabetes</b> |                    |                    |
| <b>Western Pacific Region</b>                              | <b>Cost amount</b>  | <b>Lower limit</b> | <b>Upper limit</b> | <b>Cost amount</b> | <b>Lower limit</b> | <b>Upper limit</b> | <b>Cost amount</b>     | <b>Lower limit</b> | <b>Upper limit</b> |
| Australia                                                  | 722289              | 364406             | 1073811            | 15674              | 7647               | 22520              | 36808                  | 24235              | 48952              |
| Brunei Darussalam                                          | 9698                | 4887               | 14427              | 287                | 141                | 415                | 1537                   | 1009               | 2046               |
| Cambodia                                                   | 157820              | 79160              | 235995             | 5397               | 2581               | 7880               | 8612                   | 5611               | 11580              |
| China                                                      | 21897988            | 10995113           | 32709777           | 1169515            | 561697             | 1702459            | 989399                 | 645533             | 1327631            |
| Cook Islands                                               | 486                 | 244                | 727                | 16                 | 7                  | 22                 | 42                     | 28                 | 56                 |
| Fiji                                                       | 13657               | 6863               | 20381              | 476                | 228                | 692                | 2371                   | 1549               | 3174               |
| Japan                                                      | 6908075             | 3490436            | 10255173           | 293046             | 143586             | 419303             | 200057                 | 132103             | 265338             |
| Kiribati                                                   | 212677              | 107607             | 315285             | 8782               | 4321               | 12519              | 14043                  | 9298               | 18576              |
| Lao People's Democratic Republic                           | 482059              | 242204             | 719606             | 15947              | 7676               | 23175              | 31630                  | 20665              | 42390              |
| Malaysia                                                   | 1132344             | 572686             | 1679408            | 36449              | 17914              | 52028              | 72591                  | 48019              | 96114              |
| Marshall Islands                                           | 3524                | 1783               | 5218               | 91                 | 44                 | 128                | 330                    | 220                | 440                |
| Micronesia (Federated States of)                           | 3333                | 1684               | 4950               | 128                | 66                 | 184                | 359                    | 238                | 476                |
| Mongolia                                                   | 62724               | 31535              | 93570              | 2357               | 1137               | 3422               | 1265                   | 826                | 1694               |



|                   |         |         |         |        |       |        |        |        |        |
|-------------------|---------|---------|---------|--------|-------|--------|--------|--------|--------|
| Nauru             | 567     | 288     | 842     | 13     | 4     | 13     | 30     | 22     | 39     |
| New Zealand       | 185565  | 93946   | 274935  | 3567   | 1761  | 5076   | 7655   | 5075   | 10116  |
| Niue              | 121     | 62      | 182     | 0      | 0     | 0      | 10     | 5      | 13     |
| Palau             | 1038    | 525     | 1537    | 36     | 18    | 49     | 99     | 65     | 129    |
| Papua New Guinea  | 94662   | 47540   | 141372  | 3751   | 1805  | 5457   | 10225  | 6674   | 13715  |
| Philippines       | 3202794 | 1620244 | 4748945 | 120955 | 59491 | 172516 | 166870 | 110440 | 220840 |
| Republic of Korea | 1325797 | 669862  | 1968227 | 66831  | 32744 | 95637  | 126369 | 83440  | 167608 |
| Samoa             | 2029    | 1020    | 3035    | 84     | 43    | 123    | 210    | 142    | 285    |
| Singapore         | 192449  | 97266   | 285613  | 5678   | 2787  | 8122   | 13527  | 8937   | 17931  |
| Solomon Islands   | 6812    | 3427    | 10164   | 359    | 174   | 518    | 839    | 550    | 1126   |
| Tonga             | 1472    | 739     | 2195    | 43     | 21    | 62     | 138    | 94     | 188    |
| Tuvalu            | 718     | 361     | 1061    | 15     | 8     | 22     | 44     | 26     | 55     |
| Vanuatu           | 1645    | 823     | 2458    | 87     | 43    | 126    | 162    | 108    | 225    |
| Viet Nam          | 2583476 | 1301507 | 3846350 | 106438 | 51671 | 153505 | 132089 | 86736  | 176136 |

\*No data

**Table S7. Total number of estimated cases by health outcomes attributed to physical inactivity by WHO Regions and World Bank income classification, 2020-2030**

|                                    | Cancers        |               |                | Coronary Heart Disease |                |                 | Dementia        |                |                 | Depression       |                |                  |
|------------------------------------|----------------|---------------|----------------|------------------------|----------------|-----------------|-----------------|----------------|-----------------|------------------|----------------|------------------|
|                                    | Cases          | Lower         | Upper          | Cases                  | Lower          | Upper           | Cases           | Lower          | Upper           | Cases            | Lower          | Upper            |
| African Region (AFR)               | 91072          | 17592         | 189209         | 488082                 | 337587         | 659606          | 489194          | 254951         | 806932          | 21584993         | 809533         | 45085294         |
| Region of the Americas (AMR)       | 687267         | 138820        | 1333233        | 1526438                | 1065327        | 2042028         | 3325931         | 1784152        | 5282201         | 39589118         | 1546665        | 79110075         |
| Eastern Mediterranean Region (EMR) | 174691         | 28862         | 357418         | 2261399                | 1581982        | 3017304         | 704325          | 375140         | 1128860         | 34848297         | 1376126        | 68873505         |
| European Region (EUR)              | 804329         | 148080        | 1611968        | 2933301                | 2041096        | 3937251         | 3619975         | 1910500        | 5871576         | 33951645         | 1308532        | 68822395         |
| South-East Asia Region (SEAR)      | 315630         | 53708         | 673175         | 2733001                | 1894049        | 3685185         | 2392199         | 1264868        | 3870699         | 45555456         | 1723848        | 94206623         |
| Western Pacific Region (WPR)       | 1931309        | 265640        | 4079625        | 2957353                | 2059069        | 3966848         | 3338951         | 1729355        | 5554675         | 46607660         | 1801221        | 94202495         |
| <b>Low-income</b>                  | <b>45190</b>   | <b>7176</b>   | <b>98495</b>   | <b>280536</b>          | <b>193774</b>  | <b>379714</b>   | <b>291450</b>   | <b>150305</b>  | <b>487772</b>   | <b>12749620</b>  | <b>475230</b>  | <b>26818244</b>  |
| <b>Lower-middle-income</b>         | <b>551525</b>  | <b>84713</b>  | <b>1172948</b> | <b>5555980</b>         | <b>3867314</b> | <b>7454804</b>  | <b>3512999</b>  | <b>1855930</b> | <b>5690470</b>  | <b>93783768</b>  | <b>3619913</b> | <b>189804252</b> |
| <b>Upper-middle-income</b>         | <b>1284246</b> | <b>160804</b> | <b>2843168</b> | <b>3537171</b>         | <b>2451776</b> | <b>4768621</b>  | <b>4100154</b>  | <b>2137983</b> | <b>6758453</b>  | <b>57590456</b>  | <b>2180920</b> | <b>118994008</b> |
| <b>High-income</b>                 | <b>1531653</b> | <b>276946</b> | <b>3037711</b> | <b>3135028</b>         | <b>2190216</b> | <b>4189175</b>  | <b>7255133</b>  | <b>3876255</b> | <b>11581896</b> | <b>51612088</b>  | <b>2025767</b> | <b>102641122</b> |
| <b>Total Global</b>                | <b>3412614</b> | <b>529639</b> | <b>7152322</b> | <b>12508715</b>        | <b>8703080</b> | <b>16792314</b> | <b>15159736</b> | <b>8020473</b> | <b>24518591</b> | <b>215735932</b> | <b>8301830</b> | <b>438257626</b> |

(continued from previous Table)

|                                    | Hypertension    |                 |                  | Stroke         |                |                | Type 2 Diabetes |                |                |
|------------------------------------|-----------------|-----------------|------------------|----------------|----------------|----------------|-----------------|----------------|----------------|
|                                    | Cases           | Lower           | Upper            | Cases          | Lower          | Upper          | Cases           | Lower          | Upper          |
| African Region (AFR)               | 16713759        | 8403254         | 24933050         | 355018         | 171245         | 514860         | 547218          | 357954         | 732431         |
| Region of the Americas (AMR)       | 33208413        | 16776253        | 49306968         | 827763         | 405366         | 1184954        | 2707778         | 1787419        | 3592447        |
| Eastern Mediterranean Region (EMR) | 26570506        | 13440062        | 39401911         | 687125         | 337838         | 980348         | 1576853         | 1043379        | 2087251        |
| European Region (EUR)              | 40629351        | 20492280        | 60420352         | 1085505        | 528914         | 1560584        | 1665577         | 1096141        | 2216192        |
| South-East Asia Region (SEAR)      | 48944577        | 24633470        | 72939604         | 1107618        | 536029         | 1601702        | 2432208         | 1594155        | 3249112        |
| Western Pacific Region (WPR)       | 65053617        | 32821732        | 96711421         | 3121103        | 1522306        | 4483201        | 2901910         | 1910953        | 3858976        |
| <b>Low-income</b>                  | <b>10966964</b> | <b>5510003</b>  | <b>16371643</b>  | <b>201375</b>  | <b>96912</b>   | <b>292625</b>  | <b>310727</b>   | <b>202980</b>  | <b>416456</b>  |
| <b>Lower-middle-income</b>         | <b>94488796</b> | <b>47665807</b> | <b>140491128</b> | <b>2282407</b> | <b>1112722</b> | <b>3279770</b> | <b>4583067</b>  | <b>3017189</b> | <b>6096215</b> |

|                            |                  |                 |                  |                |                |                |                 |                |                 |
|----------------------------|------------------|-----------------|------------------|----------------|----------------|----------------|-----------------|----------------|-----------------|
| <b>Upper-middle-income</b> | <b>66354447</b>  | <b>33398687</b> | <b>98876032</b>  | <b>2703037</b> | <b>1308498</b> | <b>3907852</b> | <b>3198315</b>  | <b>2096644</b> | <b>4271824</b>  |
| <b>High-income</b>         | <b>62782805</b>  | <b>31734178</b> | <b>93167857</b>  | <b>1413101</b> | <b>693206</b>  | <b>2019937</b> | <b>3155947</b>  | <b>2085419</b> | <b>4182896</b>  |
| <b>Total Global</b>        | <b>234593012</b> | <b>#####</b>    | <b>348906660</b> | <b>6599920</b> | <b>3211338</b> | <b>9500184</b> | <b>11248056</b> | <b>7402232</b> | <b>14967391</b> |

**Table S8. Direct healthcare costs attributable to physical inactivity, by health outcomes and by country (in US\$), 2020-2030**

| African Region                   | Cancers     |             |             | Coronary Heart Disease |             |             | Depression  |             |             |
|----------------------------------|-------------|-------------|-------------|------------------------|-------------|-------------|-------------|-------------|-------------|
|                                  | Cost amount | Lower limit | Upper limit | Cost amount            | Lower limit | Upper limit | Cost amount | Lower limit | Upper limit |
| Algeria                          | 29928484    | 6753055     | 57317499    | 49593840               | 34589117    | 66396898    | 831052267   | 32363229    | 1666209241  |
| Angola                           | 8573438     | 1886973     | 17102444    | 2114695                | 1462346     | 2858315     | 148179595   | 5557139     | 309508855   |
| Benin                            | 416818      | 77138       | 857558      | 96579                  | 66729       | 130717      | 5503925     | 205043      | 11587624    |
| Botswana                         | 374505      | 65713       | 882432      | 490994                 | 339460      | 661685      | 23591394    | 892463      | 48840720    |
| Burkina Faso                     | 994771      | 183291      | 2104898     | 250615                 | 173537      | 338352      | 13988365    | 526976      | 29075433    |
| Burundi                          | 1141736     | 167002      | 2609864     | 77544                  | 53643       | 104718      | 4688608     | 175817      | 9793245     |
| Cabo Verde                       | 135208      | 7170        | 296220      | 38022                  | 26334       | 51559       | 1820960     | 68283       | 3791811     |
| Cameroon                         | 3302760     | 839802      | 6029921     | 619874                 | 431109      | 832513      | 39279546    | 1510545     | 79813575    |
| Central Africa Republic          | 134978      | 31156       | 264098      | 20949                  | 14454       | 28379       | 1748373     | 64835       | 3698424     |
| Chad                             | 703687      | 176861      | 1312152     | 184610                 | 127963      | 248695      | 12277422    | 466060      | 25303917    |
| Comoros (The)                    | 68221       | 10642       | 197608      | 15309                  | 10334       | 20602       | 633859      | 23441       | 1340586     |
| Congo                            | 642957      | 152478      | 1212750     | 254428                 | 176887      | 341827      | 17283699    | 663839      | 35166770    |
| Côte d'Ivoire                    | 4206310     | 1042338     | 7669207     | 825053                 | 575360      | 1104947     | 38468962    | 1496259     | 77227148    |
| Democratic Republic of the Congo | 5147222     | 1147916     | 10052799    | 485324                 | 336657      | 653699      | 37384072    | 1420732     | 76941834    |
| Equatorial Guinea                | 223853      | 56766       | 400749      | 121133                 | 84054       | 162789      | 12348492    | 463007      | 25792039    |
| Eritrea                          | 250952      | 68358       | 471886      | 52697                  | 36513       | 71059       | 4075423     | 154321      | 8420624     |
| Eswatini                         | 120221      | 28242       | 241137      | 221119                 | 153981      | 297622      | 11083576    | 426602      | 22551658    |
| Ethiopia                         | 9484183     | 2298725     | 18167878    | 904776                 | 624529      | 1225716     | 64483151    | 2395450     | 136162506   |
| Gabon                            | 514190      | 138986      | 944569      | 205014                 | 142242      | 276038      | 13457429    | 513242      | 27583231    |
| Ghana                            | 7861329     | 1603307     | 15873553    | 1587601                | 1100003     | 2141241     | 77869604    | 2944512     | 161166962   |
| Guinea                           | 569861      | 56233       | 1213944     | 216146                 | 149224      | 292761      | 11015431    | 408683      | 23288318    |
| Guinea-Bissau                    | 121234      | 31102       | 220099      | 29225                  | 20107       | 39508       | 1671628     | 62672       | 3491830     |

|                             |          |          |           |          |          |          |            |          |            |
|-----------------------------|----------|----------|-----------|----------|----------|----------|------------|----------|------------|
| Kenya                       | 8720173  | 1198248  | 20347770  | 971775   | 670908   | 1315944  | 64249557   | 2390120  | 135467482  |
| Lesotho                     | 114300   | 14506    | 246164    | 40309    | 27455    | 55103    | 2571070    | 93451    | 5575747    |
| Liberia                     | 775296   | 171394   | 1462643   | 245665   | 170599   | 331104   | 13104594   | 499463   | 26873761   |
| Madagascar                  | 2823365  | 550967   | 5934055   | 327405   | 226498   | 442564   | 21364880   | 800671   | 44662219   |
| Malawi                      | 2502616  | 291004   | 6317210   | 374886   | 258817   | 507685   | 18652718   | 694150   | 39305227   |
| Mali                        | 2438026  | 530230   | 4679536   | 381774   | 267237   | 509130   | 15149989   | 599823   | 29861399   |
| Mauritania                  | 1211451  | 223340   | 2382092   | 263384   | 184093   | 350708   | 8702084    | 345506   | 17115063   |
| Mauritius                   | 1608573  | 353697   | 3127487   | 628096   | 435254   | 842897   | 20962257   | 808611   | 42444632   |
| Mozambique                  | 756273   | 112475   | 1869176   | 141996   | 97640    | 193759   | 9078074    | 329125   | 19731523   |
| Namibia                     | 1183186  | 281252   | 2187498   | 915334   | 638543   | 1225558  | 33089776   | 1288381  | 66378085   |
| Niger                       | 1608154  | 306981   | 3298746   | 172541   | 119621   | 232677   | 9335250    | 353518   | 19288661   |
| Nigeria                     | 52822654 | 13733880 | 95305799  | 14522523 | 10092644 | 19521119 | 684516576  | 26231253 | 1396147641 |
| Rwanda                      | 617119   | 124561   | 1241210   | 175491   | 121173   | 237780   | 13792078   | 511942   | 29149330   |
| Sao Tome and Principe       | 36357    | 838      | 77039     | 5594     | 3761     | 7651     | 220801     | 8165     | 465304     |
| Senegal                     | 1328472  | 258611   | 2654941   | 391678   | 271632   | 528088   | 15749597   | 597540   | 32478136   |
| Seychelles                  | *        | *        | *         | 26276    | 18091    | 35910    | 640334     | 24054    | 1334581    |
| Sierra Leone                | 793554   | 198616   | 1567064   | 549150   | 379017   | 744575   | 26448757   | 980692   | 55949229   |
| South Africa                | 53163740 | 11383128 | 102193988 | 36189225 | 25301321 | 48316668 | 1348231890 | 53100164 | 2671878508 |
| South Sudan                 | 854499   | 156372   | 1829662   | 371107   | 256774   | 501402   | 22535626   | 845312   | 47070416   |
| the Gambia                  | 142193   | 19831    | 180276    | 36703    | 25404    | 49453    | 2218076    | 83727    | 4599973    |
| Togo                        | 198070   | 40848    | 401555    | 54410    | 37385    | 73969    | 2925052    | 107312   | 6273482    |
| Uganda                      | 813457   | 125915   | 1926411   | 175964   | 120882   | 240046   | 20188748   | 731644   | 43895540   |
| United Republic of Tanzania | 1968121  | 290284   | 4757198   | 279091   | 191758   | 380359   | 16016978   | 582016   | 34712546   |
| Zambia                      | *        | *        | *         | 625261   | 433321   | 842972   | 38733493   | 1465816  | 80099039   |
| Zimbabwe                    | *        | *        | *         | 707932   | 491710   | 951712   | 22619337   | 866252   | 46172035   |

| Region of the Americas           | Cancers     |             |             | Coronary Heart Disease |             |             | Depression  |             |             |
|----------------------------------|-------------|-------------|-------------|------------------------|-------------|-------------|-------------|-------------|-------------|
|                                  | Cost amount | Lower limit | Upper limit | Cost amount            | Lower limit | Upper limit | Cost amount | Lower limit | Upper limit |
| Antigua and Barbuda              | *           | *           | *           | 97314                  | 68708       | 131539      | 1374390     | 53563       | 2745680     |
| Argentina                        | 79917745    | 18114349    | 148651846   | 44050051               | 30853399    | 58692937    | 1048037316  | 41615447    | 2059719867  |
| Bahamas (The)                    | 2816728     | 609516      | 5409193     | 655131                 | 459144      | 871577      | 9361589     | 373724      | 18325407    |
| Barbados                         | 2938612     | 629713      | 5350527     | 791320                 | 555018      | 1052789     | 8364739     | 333404      | 16387604    |
| Belize                           | 137817      | 31833       | 242111      | 122162                 | 85134       | 163271      | 2209396     | 86552       | 4414326     |
| Bolivia (Plurinational State of) | 3601874     | 698482      | 6947560     | 777938                 | 542816      | 1040790     | 70131905    | 2739737     | 140142947   |
| Brazil                           | 332651034   | 72113054    | 521960079   | 126950596              | 89170031    | 168629908   | 7881658480  | 317042379   | 15292672132 |
| Canada                           | 838906300   | 180840995   | 1619943153  | 115138390              | 80084298    | 154623453   | 1727244386  | 66437205    | 3508722437  |
| Chile                            | 263789348   | 43890345    | 531111701   | 14419020               | 10018597    | 19385659    | 474076296   | 18143794    | 968243278   |
| Colombia                         | 55778744    | 11224900    | 104588308   | 30909286               | 21675622    | 41125947    | 644785542   | 25752421    | 1259929271  |
| Costa Rica                       | 5460501     | 1109740     | 10129896    | 3218695                | 2258627     | 4275897     | 102179255   | 4100494     | 198672982   |
| Cuba                             | 17188816    | 3248807     | 33767008    | 42589847               | 29758338    | 56909040    | 705048059   | 27679356    | 1401780410  |
| Dominica                         | *           | *           | *           | 52526                  | 36786       | 70144       | 604601      | 23865       | 1182084     |
| Dominican Republic (The)         | 7026371     | 1550508     | 13179351    | 7873245                | 5506301     | 10506660    | 161554961   | 6374521     | 319531064   |
| Ecuador                          | 8677384     | 1572294     | 17110434    | 1936990                | 1345709     | 2602669     | 162663417   | 6234651     | 331681526   |
| El Salvador                      | 3093018     | 534857      | 6060901     | 1282002                | 894705      | 1716042     | 45166958    | 1764622     | 90256065    |
| Grenada                          | *           | *           | *           | 51483                  | 35340       | 68974       | 713268      | 27107       | 1448402     |
| Guatemala                        | 7816073     | 1452834     | 14986887    | 2319445                | 1620722     | 3098832     | 121541668   | 4773846     | 241528601   |
| Guyana                           | 393803      | 86261       | 662965      | 241195                 | 168293      | 322839      | 6300111     | 245866      | 12589528    |
| Haiti                            | 4920149     | 824371      | 9744399     | 1992288                | 1389984     | 2664487     | 48924656    | 1911379     | 97765400    |
| Honduras                         | 3168747     | 536049      | 6292162     | 1032883                | 721390      | 1382019     | 38790701    | 1515671     | 77514687    |
| Jamaica                          | 3151315     | 652115      | 6041005     | 1409805                | 982377      | 1888057     | 18232741    | 707850      | 36649882    |
| Mexico                           | 65648934    | 13705073    | 124873525   | 50743868               | 35300763    | 68133769    | 1850346720  | 71224716    | 3755779035  |

|                                     |                    |                    |                    |                               |                    |                    |                    |                    |                    |
|-------------------------------------|--------------------|--------------------|--------------------|-------------------------------|--------------------|--------------------|--------------------|--------------------|--------------------|
| Nicaragua                           | 2547189            | 495137             | 4870505            | 901627                        | 629203             | 1205851            | 36299279           | 1417657            | 72535413           |
| Panama                              | 32968520           | 5707082            | 64197320           | 2294906                       | 1601492            | 3070266            | 66673563           | 2605143            | 133232801          |
| Paraguay                            | 4755483            | 1017848            | 9002935            | 1162133                       | 810727             | 1552012            | 89404831           | 3514839            | 177533070          |
| Peru                                | 26487907           | 4725132            | 51403069           | 3712090                       | 2590960            | 4966295            | 193039847          | 7542098            | 385746107          |
| Saint Kitts and Nevis               | *                  | *                  | *                  | 67444                         | 47898              | 89799              | 1279152            | 49750              | 2574764            |
| Saint Lucia                         | 185714             | 35805              | 339125             | 117830                        | 81742              | 156433             | 1568791            | 62242              | 3096444            |
| Saint Vicent and the Grenadines     | *                  | *                  | *                  | 54338                         | 38033              | 72350              | 739117             | 28541              | 1477460            |
| Suriname                            | 2188175            | 584383             | 4017542            | 5086699                       | 3571545            | 6769280            | 100333552          | 4005602            | 195874401          |
| Trinidad and Tobago                 | 23522113           | 4083756            | 45857679           | 4085052                       | 2855075            | 5455534            | 53675943           | 2115156            | 106373917          |
| United States of America            | 6254431764         | 1283945571         | 12043673204        | 2357663820                    | 1649936703         | 3144453298         | 61218938280        | 2421583192         | 120784063272       |
| Uruguay                             | 35425313           | 6963638            | 70570067           | 3982499                       | 2761349            | 5369252            | 79645133           | 3017740            | 164562883          |
| Venezuela (Bolivarian Republic of)  | 20558069           | 4384661            | 38947972           | 17782248                      | 12387366           | 23838598           | 505560928          | 19582419           | 1019418415         |
|                                     | <b>Cancers</b>     |                    |                    | <b>Coronary Heart Disease</b> |                    |                    | <b>Depression</b>  |                    |                    |
| <b>Eastern Mediterranean Region</b> | <b>Cost amount</b> | <b>Lower limit</b> | <b>Upper limit</b> | <b>Cost amount</b>            | <b>Lower limit</b> | <b>Upper limit</b> | <b>Cost amount</b> | <b>Lower limit</b> | <b>Upper limit</b> |
| Afghanistan                         | 6619998            | 1039498            | 9618905            | 4432446                       | 3100841            | 5914271            | 126487101          | 4994914            | 249986762          |
| Bahrain                             | 24018464           | 4877795            | 48127594           | 3928713                       | 2749547            | 5240914            | 84021690           | 3317488            | 166055995          |
| Egypt                               | 70138639           | 12790620           | 147237383          | 114309456                     | 79610711           | 153282307          | 1486074638         | 57502263           | 2999681535         |
| Iran (Islamic Republic of)          | 157276453          | 29513915           | 307302018          | 463446256                     | 323148146          | 620613924          | 6439036559         | 250508449          | 12923170302        |
| Iraq                                | 21649208           | 5456632            | 39135095           | 22930537                      | 16147585           | 30372477           | 404184462          | 16450938           | 775324621          |
| Jordan                              | 1979712            | 419723             | 3832648            | 2234275                       | 1539495            | 3032461            | 44114315           | 1626152            | 94000647           |
| Kuwait                              | 95659532           | 20574454           | 177573058          | 22359480                      | 15862565           | 29373340           | 467613912          | 19699170           | 868781252          |
| Lebanon                             | 9209269            | 1995690            | 17872293           | 21127186                      | 14757738           | 28237580           | 287322556          | 11266860           | 571978607          |
| Libya                               | 5162044            | 1311414            | 9308894            | 11691546                      | 8166674            | 15627082           | 223699149          | 8773099            | 445314220          |
| Morocco                             | 14563793           | 2963412            | 28775036           | 13695331                      | 9513188            | 18419381           | 238749656          | 9128068            | 488147337          |
| Oman                                | 33396954           | 5781413            | 65226923           | 4803513                       | 3348283            | 6432756            | 130070956          | 5057457            | 261249577          |

|                        |                    |                    |                    |                               |                    |                    |                    |                    |                    |
|------------------------|--------------------|--------------------|--------------------|-------------------------------|--------------------|--------------------|--------------------|--------------------|--------------------|
| Pakistan               | 79313409           | 13331855           | 167141642          | 20936614                      | 14602516           | 28028645           | 448787287          | 17481651           | 899559092          |
| Qatar                  | 7911634            | 1684765            | 15003232           | 5893849                       | 4118787            | 7876118            | 224400679          | 8807227            | 446266940          |
| Saudi Arabia           | 299023495          | 63840971           | 554318772          | 120783412                     | 85101622           | 159885847          | 3166161677         | 129207437          | 6058550650         |
| Somalia                | 2137600            | 489619             | 4076691            | 4650374                       | 3253369            | 6203128            | 321092825          | 12679853           | 634602482          |
| Sudan                  | 12141649           | 2758436            | 23305984           | 10493105                      | 7340871            | 14001178           | 226707864          | 8952596            | 448061313          |
| Syrian Arab Republic   | 5407868            | 1203520            | 10328582           | 34539525                      | 24160823           | 46084546           | 406656027          | 16059722           | 803707269          |
| Tunisia                | 7645195            | 1430573            | 15703109           | 14615277                      | 10175230           | 19605324           | 240140971          | 9279126            | 485496956          |
| United Arab Emirates   | 27005936           | 6120976            | 50060966           | 18547991                      | 12991718           | 24718344           | 492662050          | 19555161           | 968701897          |
| Yemen                  | *                  | *                  | *                  | 33968411                      | 23762387           | 45321813           | 879995866          | 34748782           | 1739208434         |
| Djibouti               | 460217             | 73908              | 927555             | 51812                         | 36285              | 69153              | 2880716            | 113772             | 5693536            |
|                        | <b>Cancers</b>     |                    |                    | <b>Coronary Heart Disease</b> |                    |                    | <b>Depression</b>  |                    |                    |
| <b>European Region</b> | <b>Cost amount</b> | <b>Lower limit</b> | <b>Upper limit</b> | <b>Cost amount</b>            | <b>Lower limit</b> | <b>Upper limit</b> | <b>Cost amount</b> | <b>Lower limit</b> | <b>Upper limit</b> |
| Albania                | 2990906            | 349542             | 5468375            | 1128947                       | 785722             | 1515937            | 12787059           | 492345             | 25920131           |
| Andorra                | *                  | *                  | *                  | 1331587                       | 930261             | 1775438            | 32976959           | 1299953            | 65320628           |
| Armenia                | 2877633            | 470433             | 4979126            | 2959791                       | 2052601            | 3989632            | 21790565           | 825434             | 44998389           |
| Austria                | 384031179          | 69902225           | 660427531          | 45629521                      | 31758847           | 61223608           | 600985558          | 23203034           | 1215975841         |
| Azerbaijan             | 9628087            | 1266623            | 17665869           | 10448175                      | 7269850            | 14024445           | 83862818           | 3232458            | 169995185          |
| Belarus                | 10965550           | 1812481            | 20137770           | 12283521                      | 8476266            | 16651335           | 115060884          | 4267089            | 243547148          |
| Belgium                | 612955464          | 105598011          | 993566199          | 36530373                      | 25503356           | 48846538           | 847816560          | 33186550           | 1690733135         |
| Bosnia and Herzegovina | 4972525            | 851645             | 8469793            | 2945257                       | 2045628            | 3962643            | 32260027           | 1231548            | 66084858           |
| Bulgaria               | 14160424           | 2321972            | 22864086           | 16184951                      | 11317433           | 21602474           | 64172851           | 2529613            | 127050405          |
| Croatia                | 49492801           | 8238731            | 82938410           | 6446680                       | 4488637            | 8643017            | 60088959           | 2325861            | 121259221          |
| Cyprus                 | 22286789           | 4186083            | 27224193           | 1581000                       | 1109324            | 2103749            | 33942614           | 1355538            | 66263426           |
| Czechia                | 212973332          | 39587850           | 365111947          | 17443876                      | 12149590           | 23389785           | 225208547          | 8716300            | 454469970          |
| Denmark                | 222177016          | 39922030           | 396554366          | 13078047                      | 9095563            | 17561525           | 387160665          | 14882348           | 786690333          |



|                     |            |           |            |           |           |           |            |           |             |
|---------------------|------------|-----------|------------|-----------|-----------|-----------|------------|-----------|-------------|
| Estonia             | 19880206   | 3463053   | 34342041   | 3310192   | 2306570   | 4436426   | 29728161   | 1151743   | 59849818    |
| Finland             | 65566797   | 12072273  | 213300753  | 15301250  | 10572568  | 20703078  | 167573889  | 6252892   | 352070287   |
| France              | 2494567191 | 479378471 | 4444725539 | 147832586 | 102863184 | 198445727 | 3596457141 | 138574041 | 7292211605  |
| Georgia             | 4309862    | 704090    | 11565947   | 2936360   | 2030381   | 3970461   | 24004331   | 898983    | 50227355    |
| Germany             | 5304883288 | 857916189 | 6702821886 | 573453239 | 401779005 | 763831841 | 7411482123 | 294729221 | 14544781780 |
| Greece              | 187019083  | 28095835  | 246418376  | 34985691  | 24452594  | 46723586  | 342698408  | 13480018  | 679992933   |
| Hungary             | 150768830  | 25997859  | 207011342  | 24293766  | 16987615  | 32430622  | 230277765  | 9077352   | 456019328   |
| Iceland             | 12533669   | 2231082   | 21997491   | 936749    | 652410    | 1259888   | 14005064   | 537334    | 28401041    |
| Ireland             | 174264021  | 32245583  | 290175368  | 11628053  | 8105606   | 15578335  | 296850991  | 11533878  | 596548051   |
| Israel              | 266812381  | 43898451  | 462847618  | 8898699   | 6191552   | 11942962  | 298942512  | 11520707  | 605976894   |
| Italy               | 2504868561 | 389958681 | 3114867737 | 288749421 | 202220904 | 384791752 | 3330520654 | 132187266 | 6548685861  |
| Kazakhstan          | 21786734   | 3413133   | 47263024   | 15897683  | 11049284  | 21361221  | 196721600  | 7545852   | 400800857   |
| Kyrgyzstan          | 1032675    | 117323    | 4457092    | 589809    | 407069    | 799604    | 7645585    | 283284    | 16192854    |
| Latvia              | 25836073   | 4149426   | 47389781   | 2431569   | 1692217   | 3264621   | 34232287   | 1319121   | 69370644    |
| Lithuania           | 41153877   | 6570504   | 87014976   | 4722704   | 3282212   | 6350417   | 44838412   | 1715317   | 91601822    |
| Luxembourg          | 26211386   | 4738468   | 49725290   | 1706595   | 1191471   | 2291160   | 51915218   | 2003155   | 105523352   |
| Malta               | 17743683   | 3001483   | 22608181   | 797376    | 555990    | 1061582   | 22194896   | 880921    | 43609408    |
| Monaco              | *          | *         | *          | 74830     | 52135     | 101457    | 1583412    | 61089     | 3206552     |
| Montenegro          | 895514     | 150917    | 1556410    | 1250338   | 867006    | 1678041   | 15255702   | 587073    | 30926051    |
| Netherlands         | 903750671  | 149178949 | 1492566290 | 113143171 | 78634334  | 152077665 | 1160590335 | 44485926  | 2366518075  |
| North Macedonia     | 27563021   | 4146989   | 46877688   | 1482540   | 1030977   | 1989700   | 18089524   | 696529    | 36669040    |
| Norway              | 256525567  | 46804637  | 420084462  | 21122648  | 14714995  | 28299452  | 400539752  | 15525477  | 807007899   |
| Poland              | 497684492  | 78447465  | 825778438  | 38044322  | 26515951  | 50967216  | 645239531  | 25060915  | 1297344941  |
| Portugal            | 230891895  | 39570570  | 293265955  | 11956028  | 8384231   | 15916383  | 1886920579 | 75251371  | 3692371492  |
| Republic of Moldova | 2424773    | 373962    | 11715216   | 1350659   | 930877    | 1833790   | 12571730   | 462990    | 26821135    |

|                                                            |                    |                    |                    |                               |                    |                    |                    |                    |                    |
|------------------------------------------------------------|--------------------|--------------------|--------------------|-------------------------------|--------------------|--------------------|--------------------|--------------------|--------------------|
| Romania                                                    | 44341751           | 7737241            | 65079560           | 14870385                      | 10381316           | 19886829           | 208858561          | 8168847            | 416828864          |
| Russian Federation                                         | 142804535          | 28700708           | 541920903          | 186340323                     | 128776665          | 252068262          | 1536992019         | 57423232           | 3224432260         |
| San Marino                                                 | *                  | *                  | *                  | 47600                         | 32456              | 63482              | 1233824            | 45513              | 2497448            |
| Serbia                                                     | 21684849           | 3776344            | 28109171           | 20431102                      | 14292398           | 27255835           | 166924295          | 6594868            | 329744363          |
| Slovakia                                                   | 108270184          | 18915576           | 127266796          | 12163479                      | 8488064            | 16270721           | 88457163           | 3456947            | 176760267          |
| Slovenia                                                   | 45778925           | 8069544            | 75850142           | 2576935                       | 1796265            | 3452357            | 62637601           | 2433887            | 126038823          |
| Spain                                                      | 822866961          | 137350468          | 1199648964         | 98874201                      | 68701291           | 132927876          | 1616781831         | 61910907           | 3300288078         |
| Sweden                                                     | 200050910          | 34889926           | 440422482          | 15968046                      | 11070202           | 21517983           | 574781814          | 21803577           | 1185290996         |
| Switzerland                                                | 440215891          | 57377757           | 942471971          | 31612381                      | 21931580           | 42585682           | 703260079          | 26722212           | 1447830132         |
| Tajikistan                                                 | 1794931            | 219593             | 3760879            | 1376644                       | 958139             | 1848055            | 15553018           | 599237             | 31535036           |
| Turkey                                                     | 154798094          | 25085274           | 257565401          | 107264837                     | 74688028           | 143873041          | 2261430812         | 87417995           | 4569554778         |
| Turkmenistan                                               | 3050970            | 411983             | 6426145            | 4448423                       | 3095957            | 5971281            | 44566270           | 1717661            | 90336246           |
| Ukraine                                                    | 52417989           | 7615607            | 149269526          | 60304167                      | 41734406           | 81444406           | 485202292          | 18244710           | 1010537331         |
| United Kingdom of Great Britain and Northern Ireland (the) | 8214790735         | 1622813490         | 12728680824        | 205673151                     | 143613708          | 274974602          | 5612516807         | 219811218          | 11186956016        |
| Uzbekistan                                                 | 6621686            | 951485             | 19487939           | 7018776                       | 4856000            | 9481798            | 72219374           | 2712287            | 150629732          |
|                                                            | <b>Cancers</b>     |                    |                    | <b>Coronary Heart Disease</b> |                    |                    | <b>Depression</b>  |                    |                    |
| <b>South-East Asia Region</b>                              | <b>Cost amount</b> | <b>Lower limit</b> | <b>Upper limit</b> | <b>Cost amount</b>            | <b>Lower limit</b> | <b>Upper limit</b> | <b>Cost amount</b> | <b>Lower limit</b> | <b>Upper limit</b> |
| Bangladesh                                                 | 82258213           | 7247649            | 201521203          | 10048215                      | 6985807            | 13500783           | 251540938          | 9656047            | 512077194          |
| Bhutan                                                     | 47243              | 0                  | 116095             | 122996                        | 122996             | 122996             | 1945161            | 1945161            | 1945161            |
| Democratic People's Republic of Korea                      | 9097868            | 1769764            | 17948930           | 3491713                       | 2420099            | 4708219            | 67340707           | 2548148            | 139257709          |
| India                                                      | 703279845          | 111229448          | 1462287279         | 273265771                     | 190624185          | 365765696          | 4588575047         | 178870697          | 9190360183         |
| Indonesia                                                  | 53981671           | 13366245           | 71702086           | 9687978                       | 6716032            | 13059029           | 426224983          | 16149357           | 880176057          |
| Maldives                                                   | 212577             | 51426              | 395490             | 110835                        | 77054              | 147438             | 4740832            | 182572             | 9586837            |
| Myanmar                                                    | 6158481            | 760196             | 14201629           | 1376440                       | 947690             | 1869683            | 34674162           | 1274105            | 74158710           |
| Nepal                                                      | 1364976            | 204983             | 2919731            | 1441144                       | 993723             | 1954065            | 42255846           | 1563749            | 89630583           |

|                                  |                    |                    |                    |                               |                    |                    |                    |                    |                    |
|----------------------------------|--------------------|--------------------|--------------------|-------------------------------|--------------------|--------------------|--------------------|--------------------|--------------------|
| Sri Lanka                        | 14872692           | 2210251            | 31798837           | 4040222                       | 2810968            | 5424510            | 87440379           | 3365678            | 177483891          |
| Thailand                         | 40587098           | 8748566            | 78125097           | 11505321                      | 7985314            | 15489253           | 306326341          | 11664966           | 629069536          |
| Timor-Leste                      | 51688              | 6867               | 95508              | 43874                         | 30616              | 59281              | 1428282            | 53591              | 2990290            |
|                                  | <b>Cancers</b>     |                    |                    | <b>Coronary Heart Disease</b> |                    |                    | <b>Depression</b>  |                    |                    |
| <b>Western Pacific Region</b>    | <b>Cost amount</b> | <b>Lower limit</b> | <b>Upper limit</b> | <b>Cost amount</b>            | <b>Lower limit</b> | <b>Upper limit</b> | <b>Cost amount</b> | <b>Lower limit</b> | <b>Upper limit</b> |
| Australia                        | 704238585          | 154727240          | 1210095857         | 125562505                     | 87422828           | 168436391          | 1761302948         | 68047245           | 3560838895         |
| Brunei Darussalam                | 1692631            | 298733             | 3112445            | 146089                        | 100784             | 195342             | 3655331            | 140562             | 7452425            |
| Cambodia                         | 1672169            | 281586             | 3171156            | 282846                        | 194669             | 384340             | 10627101           | 390245             | 22742571           |
| China                            | 1100041686         | 151129676          | 2275213837         | 241613315                     | 166687448          | 327481141          | 4737789617         | 175639608          | 10028320844        |
| Cook Islands                     | *                  | *                  | *                  | 7016                          | 5078               | 9758               | 113330             | 3418               | 234878             |
| Fiji                             | 198597             | 22331              | 369715             | 55758                         | 38296              | 75068              | 1323807            | 49479              | 2774808            |
| Japan                            | 8815622997         | 1171296735         | 16581560101        | 413054918                     | 288370625          | 552374272          | 5314148            | 207916             | 10602968           |
| Kiribati                         | *                  | *                  | *                  | 274474                        | 191931             | 365715             | 9695657            | 383932             | 19110694           |
| Lao People's Democratic Republic | 803417             | 144697             | 1537514            | 833262                        | 575510             | 1127807            | 28529185           | 1063639            | 59992152           |
| Malaysia                         | 23478496           | 5027083            | 39987275           | 12354665                      | 8640947            | 16490691           | 415547919          | 16390524           | 822292894          |
| Marshall Islands                 | *                  | *                  | *                  | 10844                         | 7572               | 13969              | 338734             | 13517              | 663908             |
| Micronesia (Federated States of) | 1546961            | 289118             | 2826870            | 33371                         | 23542              | 45307              | 847856             | 33750              | 1688493            |
| Mongolia                         | 1382510            | 73964              | 3274414            | 944619                        | 653170             | 1277068            | 16057404           | 602404             | 33538699           |
| Nauru                            | *                  | *                  | *                  | 4399                          | 1564               | 6768               | 146426             | 6231               | 290746             |
| New Zealand                      | 113260509          | 25457287           | 195523708          | 17576184                      | 12316845           | 23406912           | 234674313          | 9338113            | 460314532          |
| Niue                             | *                  | *                  | *                  | 1262                          | 2063               | 0                  | 20152              | 7                  | 40606              |
| Palau                            | *                  | *                  | *                  | 19677                         | 13331              | 26662              | 453588             | 16782              | 893767             |
| Papua New Guinea                 | 1584515            | 268124             | 3132227            | 84417                         | 58318              | 114355             | 3229502            | 120011             | 6821499            |
| Philippines                      | 59542204           | 14343061           | 102614749          | 15571429                      | 10895714           | 20771636           | 340484091          | 13458503           | 672264425          |
| Republic of Korea                | 372631426          | 41625966           | 720391956          | 51697552                      | 36091436           | 69139359           | 1295366366         | 50667821           | 2585216266         |

|                 |          |          |           |          |         |          |           |         |           |
|-----------------|----------|----------|-----------|----------|---------|----------|-----------|---------|-----------|
| Samoa           | 61988    | 7311     | 106716    | 8147     | 5821    | 11104    | 191654    | 7144    | 407332    |
| Singapore       | 73266529 | 15229980 | 129667914 | 10439589 | 7295079 | 13953897 | 186194148 | 7301331 | 370569288 |
| Solomon Islands | 26972    | 2659     | 66380     | 8733     | 6117    | 11826    | 313745    | 11780   | 656202    |
| Tonga           | *        | *        | *         | 6207     | 4124    | 8325     | 117521    | 4317    | 246174    |
| Tuvalu          | *        | *        | *         | 3329     | 1773    | 4070     | 76236     | 3506    | 150798    |
| Vanuatu         | 28299    | 1328     | 28629     | 2627     | 1735    | 3556     | 70701     | 2522    | 152611    |
| Viet Nam        | 39260045 | 6849635  | 75173284  | 8309991  | 5769661 | 11182131 | 187106512 | 7139323 | 383395521 |

\*No estimates

(continued from previous table)

| African Region                   | Hypertension |             |             | Stroke      |             |             | Type 2 Diabetes |             |             |
|----------------------------------|--------------|-------------|-------------|-------------|-------------|-------------|-----------------|-------------|-------------|
|                                  | Cost amount  | Lower limit | Upper limit | Cost amount | Lower limit | Upper limit | Cost amount     | Lower limit | Upper limit |
| Algeria                          | 319038872    | 161111593   | 473876634   | 49399214    | 24161511    | 70787895    | 231351524       | 152606717   | 307142162   |
| Angola                           | 37741426     | 18975521    | 56301333    | 5520662     | 2665396     | 8004917     | 15192086        | 9934241     | 20335942    |
| Benin                            | 2138138      | 1074075     | 3192058     | 241874      | 116428      | 351560      | 46702           | 30508       | 62666       |
| Botswana                         | 10562146     | 5314746     | 15742152    | 1400393     | 675160      | 2027989     | 454203          | 297414      | 607472      |
| Burkina Faso                     | 6687298      | 3363867     | 9970910     | 667087      | 322411      | 966104      | 347656          | 227693      | 464959      |
| Burundi                          | 2303549      | 1158161     | 3436363     | 216106      | 104047      | 313389      | 125347          | 82098       | 167801      |
| Cabo Verde                       | *            | *           | *           | 90511       | 43981       | 131216      | 3674            | 2403        | 4923        |
| Cameroon                         | 12120697     | 6111776     | 18029523    | 1703165     | 829428      | 2450289     | 3946717         | 2596150     | 5254218     |
| Central Africa Republic          | 1181424      | 593288      | 1764648     | 91214       | 43777       | 132869      | 81558           | 53200       | 109337      |
| Chad                             | 3919031      | 1973114     | 5838345     | 415425      | 201196      | 600316      | 274952          | 180271      | 366979      |
| Comoros (The)                    | 289465       | 145340      | 432394      | 38825       | 18416       | 56294       | 2277            | 1507        | 3047        |
| Congo                            | 665281       | 335399      | 989743      | 529429      | 257885      | 762248      | 247666          | 163004      | 330148      |
| Côte d'Ivoire                    | 20493139     | 10347416    | 30443317    | 2516374     | 1230254     | 3607950     | 2118246         | 1396896     | 2812817     |
| Democratic Republic of the Congo | 9060739      | 4562473     | 13496099    | 5271578     | 2555054     | 7611999     | 2744396         | 1800543     | 3662786     |

|                       |           |          |           |          |          |          |           |           |           |
|-----------------------|-----------|----------|-----------|----------|----------|----------|-----------|-----------|-----------|
| Equatorial Guinea     | 3146802   | 1582408  | 4694934   | 236708   | 115592   | 343135   | 59458     | 39053     | 79946     |
| Eritrea               | 822114    | 413752   | 1225045   | 123855   | 59926    | 178934   | 36036     | 23587     | 48131     |
| Eswatini              | 4583154   | 2310520  | 6817971   | 563115   | 278021   | 812714   | 48926     | 32314     | 65254     |
| Ethiopia              | 30873008  | 15505163 | 46105225  | 1702195  | 818236   | 2476157  | 9290434   | 6064256   | 12460118  |
| Gabon                 | 4703826   | 2369540  | 7003035   | 494750   | 240576   | 711778   | 226654    | 148764    | 301738    |
| Ghana                 | 1801616   | 906830   | 2684997   | 3773339  | 1825338  | 5456574  | 3586092   | 2349699   | 4791880   |
| Gambia (The)          | *         | *        | *         | 95883    | 46407    | 138508   | 3790      | 2482      | 5071      |
| Guinea                | 10302026  | 5173339  | 15386720  | 500368   | 240534   | 727678   | 132755    | 86655     | 178140    |
| Guinea-Bissau         | 4306533   | 2165225  | 6424254   | 83757    | 40088    | 121367   | 4211      | 2763      | 5644      |
| Kenya                 | 1092571   | 548647   | 1631526   | 2369065  | 1139032  | 3444698  | 7785574   | 5084068   | 10438878  |
| Lesotho               | 17320702  | 8676587  | 25932137  | 122936   | 58178    | 180306   | 18427     | 12051     | 24847     |
| Liberia               | 2118449   | 1067229  | 3154315   | 486536   | 236173   | 701803   | 94609     | 62134     | 126137    |
| Madagascar            | 1437223   | 722469   | 2144091   | 1446286  | 697392   | 2098259  | 729401    | 477049    | 976154    |
| Malawi                | 13839261  | 6951901  | 20663333  | 870695   | 418228   | 1264035  | 976694    | 637779    | 1309522   |
| Mali                  | 8421553   | 4261221  | 12484650  | 979860   | 482172   | 1396647  | 507772    | 336130    | 671802    |
| Mauritania            | 23463968  | 11875535 | 34775416  | 552893   | 271943   | 787752   | 46910     | 31099     | 62038     |
| Mauritius             | 34439303  | 17372641 | 51209915  | 1977256  | 967717   | 2840516  | 1007933   | 663906    | 1340912   |
| Mozambique            | 398151    | 199326   | 596215    | 625056   | 297832   | 916557   | 488952    | 317279    | 659127    |
| Namibia               | 149609603 | 75546865 | 222231541 | 1738340  | 849853   | 2493742  | 595793    | 393286    | 791923    |
| Niger                 | 741421    | 373165   | 1104780   | 476275   | 230828   | 688805   | 455812    | 298851    | 608799    |
| Nigeria               | 42890205  | 21618042 | 63824865  | 33003857 | 16048618 | 47537273 | 379583900 | 249477668 | 505689781 |
| Rwanda                | 74577933  | 37451598 | 111383128 | 502714   | 241653   | 731934   | 367753    | 240132    | 493142    |
| Sao Tome and Principe | 7467593   | 3750932  | 11149945  | 25677    | 12993    | 38742    | 541       | 349       | 746       |
| Senegal               | 96705     | 48715    | 144137    | 856806   | 415173   | 1237892  | 771294    | 505803    | 1030061   |
| Seychelles            | 73047565  | 36728410 | 108963519 | 124254   | 63101    | 175626   | 1583      | 1025      | 2118      |

|                                  |                     |                    |                    |                    |                    |                    |                        |                    |                    |
|----------------------------------|---------------------|--------------------|--------------------|--------------------|--------------------|--------------------|------------------------|--------------------|--------------------|
| Sierra Leone                     | 182304              | 91524              | 271906             | 1262789            | 607503             | 1835031            | 133293                 | 87242              | 178961             |
| South Africa                     | 64043663            | 32384372           | 95000096           | 72968170           | 35843898           | 104201591          | 1163847610             | 769668516          | 1541453700         |
| South Sudan                      | 32661259            | 16421193           | 48723089           | 493160             | 237327             | 715175             | 1402081                | 917040             | 1877699            |
| Togo                             | 1256157             | 629927             | 1878757            | 154712             | 74159              | 226383             | 25537                  | 16621              | 34369              |
| Uganda                           | 4947069             | 2477534            | 7408369            | 469101             | 223556             | 688946             | 1139916                | 739669             | 1536780            |
| United Republic of Tanzania      | 6562083             | 3287469            | 9824053            | 721090             | 343738             | 1056722            | 3759540                | 2441303            | 5067589            |
| Zambia                           | 16828687            | 8469830            | 25078970           | 1507141            | 729491             | 2179490            | 3860525                | 2530635            | 5157910            |
| Zimbabwe                         | 12175726            | 6136358            | 18120142           | 1417833            | 689418             | 2042992            | 1517667                | 997299             | 2021734            |
|                                  | <b>Hypertension</b> |                    |                    | <b>Stroke</b>      |                    |                    | <b>Type 2 Diabetes</b> |                    |                    |
| <b>Region of the Americas</b>    | <b>Cost amount</b>  | <b>Lower limit</b> | <b>Upper limit</b> | <b>Cost amount</b> | <b>Lower limit</b> | <b>Upper limit</b> | <b>Cost amount</b>     | <b>Lower limit</b> | <b>Upper limit</b> |
| Antigua and Barbuda              | 1067604             | 539759             | 1585506            | 93162              | 44656              | 132703             | 2721                   | 1818               | 3607               |
| Argentina                        | 750802669           | 380028806          | 1112656184         | 78662562           | 38757644           | 112030493          | 249674790              | 165412179          | 330105766          |
| Bahamas (The)                    | 6441687             | 3261774            | 9541627            | 768972             | 384653             | 1098131            | 86796                  | 57504              | 114667             |
| Barbados                         | 4742640             | 2401613            | 7025462            | 666186             | 330504             | 950393             | 65246                  | 43160              | 86427              |
| Belize                           | 895455              | 452521             | 1329838            | 88481              | 44241              | 126793             | 19411                  | 12843              | 25792              |
| Bolivia (Plurinational State of) | 24564616            | 12409565           | 36472610           | 3124027            | 1529257            | 4470142            | 6784189                | 4478105            | 9000170            |
| Brazil                           | 3872242711          | 1963041165         | 5729792043         | 471014120          | 233171970          | 668182710          | 29890929542            | 19859924313        | 39411650274        |
| Canada                           | 1010266986          | 509432925          | 1502727705         | 127655712          | 62162400           | 183648132          | 810397271              | 533102795          | 1078754838         |
| Chile                            | 272351376           | 137251914          | 405340500          | 26003275           | 12628605           | 37456319           | 112663510              | 74031671           | 150118059          |
| Colombia                         | 476517959           | 241363124          | 705701011          | 47884922           | 23639434           | 68081489           | 1006245527             | 667500617          | 1328771335         |
| Costa Rica                       | 52709213            | 26714113           | 78015392           | 4563843            | 2253639            | 6476737            | 16611313               | 11032259           | 21913288           |
| Cuba                             | 240339786           | 121484855          | 356647093          | 32928827           | 16154123           | 47061901           | 84686464               | 55967161           | 112240477          |
| Dominica                         | *                   | *                  | *                  | 50325              | 24595              | 70933              | 420177                 | 275793             | 558206             |
| Dominican Republic (The)         | 77318315            | 39106147           | 114666024          | 10982691           | 5398048            | 15674612           | 23770275               | 15725407           | 31466037           |
| Ecuador                          | 58611802            | 29543094           | 87217288           | 7432917            | 3617295            | 10708444           | 30263732               | 19891435           | 40312929           |

|                                     |                     |                    |                    |                    |                    |                    |                        |                    |                    |
|-------------------------------------|---------------------|--------------------|--------------------|--------------------|--------------------|--------------------|------------------------|--------------------|--------------------|
| El Salvador                         | 18341785            | 9265433            | 27233227           | 1894575            | 927489             | 2714432            | 4310950                | 2844878            | 5717377            |
| Grenada                             | 459891              | 232043             | 684216             | 56178              | 26740              | 80908              | 3388                   | 2229               | 4513               |
| Guatemala                           | 43008476            | 21741183           | 63817888           | 4081484            | 2000834            | 5831094            | 49299777               | 32584496           | 65333112           |
| Guyana                              | 2317755             | 1171029            | 3441336            | 3235734            | 1585642            | 4633316            | 102506                 | 67673              | 135998             |
| Haiti                               | 18184422            | 9186302            | 26999501           | 3262493            | 1598160            | 4670710            | 7902026                | 5215899            | 10483610           |
| Honduras                            | 17967528            | 9076781            | 26677496           | 1487414            | 727148             | 2128290            | 4472595                | 2953008            | 5934400            |
| Jamaica                             | 12332589            | 6226135            | 18323205           | 1676402            | 820057             | 2403623            | 1972300                | 1299831            | 2620955            |
| Mexico                              | 722471651           | 364341540          | 1074551365         | 74243211           | 36158379           | 106782753          | 7998265011             | 5262432173         | 10645365545        |
| Nicaragua                           | 17345853            | 8762693            | 25754910           | 1528214            | 746377             | 2187897            | 3510765                | 2317430            | 4657301            |
| Panama                              | 41684347            | 21059644           | 61892119           | 4540507            | 2218981            | 6501559            | 3470176                | 2290825            | 4603469            |
| Paraguay                            | 47199136            | 23861744           | 70030193           | 5494614            | 2698103            | 7854907            | 5207339                | 3442217            | 6900151            |
| Peru                                | 96268197            | 48633048           | 142937741          | 12473996           | 6107301            | 17857271           | 79467584               | 52461859           | 105437383          |
| Saint Kitts and Nevis               | *                   | *                  | *                  | 83620              | 57663              | 125405             | 1232                   | 810                | 1620               |
| Saint Lucia                         | 1115975             | 564631             | 1654367            | 129066             | 62736              | 181052             | 12106                  | 8042               | 16027              |
| Saint Vicent and the Grenadines     | 456302              | 230709             | 677520             | 61447              | 30775              | 88154              | 2681                   | 1748               | 3551               |
| Suriname                            | 41860337            | 21203322           | 61990148           | 5750553            | 2829381            | 8183890            | 1240397                | 821849             | 1639601            |
| Trinidad and Tobago                 | 30875400            | 15612465           | 45799430           | 3523530            | 1724627            | 5022753            | 1302668                | 861679             | 1724974            |
| United States of America            | 23435875118         | 11856883035        | 34746638055        | 3806526957         | 1872729050         | 5427973904         | 469832310001           | 310997757499       | 621684169759       |
| Uruguay                             | 58375156            | 29381350           | 86982187           | 7919695            | 3844508            | 11457275           | 2387668                | 1566580            | 3193041            |
| Venezuela (Bolivarian Republic of)  | 238100353           | 120161148          | 353879744          | 30404138           | 14842601           | 43644118           | 33666607               | 22181401           | 44748480           |
|                                     | <b>Hypertension</b> |                    |                    | <b>Stroke</b>      |                    |                    | <b>Type 2 Diabetes</b> |                    |                    |
| <b>Eastern Mediterranean Region</b> | <b>Cost amount</b>  | <b>Lower limit</b> | <b>Upper limit</b> | <b>Cost amount</b> | <b>Lower limit</b> | <b>Upper limit</b> | <b>Cost amount</b>     | <b>Lower limit</b> | <b>Upper limit</b> |
| Afghanistan                         | 43132636            | 21817548           | 63962195           | 6869567            | 3377245            | 9800979            | 18962327               | 12548070           | 25100702           |
| Bahrain                             | 18214634            | 9214516            | 27010626           | 2243713            | 1102812            | 3209459            | 1821952                | 1205936            | 2411533            |
| Djibouti                            | 970770              | 491040             | 1439617            | 118492             | 58662              | 169120             | 20733                  | 13669              | 27405              |

|                            |                     |                    |                    |                    |                    |                    |                        |                    |                    |
|----------------------------|---------------------|--------------------|--------------------|--------------------|--------------------|--------------------|------------------------|--------------------|--------------------|
| Egypt                      | 710939281           | 358745280          | 1056762184         | 134324049          | 65546786           | 192868432          | 578566758              | 381091950          | 769179768          |
| Iran (Islamic Republic of) | 1977144125          | 998319172          | 2937034440         | 323067442          | 157964986          | 463106839          | 3798686910             | 2505145682         | 5044289009         |
| Iraq                       | 185420608           | 94134541           | 273985710          | 42644324           | 21202054           | 60280980           | 240991736              | 160539107          | 316956379          |
| Jordan                     | 11312133            | 5675907            | 16908299           | 2993797            | 1435379            | 4366886            | 8368130                | 5450529            | 11237511           |
| Kuwait                     | 179620183           | 91577797           | 264320633          | 20364966           | 10264435           | 28469148           | 47667821               | 31999937           | 62253308           |
| Lebanon                    | 133058259           | 67248784           | 197476334          | 17620124           | 8637261            | 25202365           | 31829564               | 21032610           | 42201579           |
| Libya                      | 77181771            | 39007130           | 114548676          | 13250890           | 6497124            | 18941480           | 52351435               | 34583153           | 69405770           |
| Morocco                    | 95601968            | 48173872           | 142301705          | 15495212           | 7527357            | 22333455           | 76783118               | 50441922           | 102344041          |
| Oman                       | 40434344            | 20414725           | 60068506           | 3970554            | 1946792            | 5695648            | 3688592                | 2432438            | 4900558            |
| Pakistan                   | 332486664           | 167907239          | 493836295          | 27325849           | 13367041           | 39153297           | 1161348424             | 766113432          | 1541769300         |
| Qatar                      | 51766384            | 26165613           | 76818202           | 4560111            | 2244780            | 6525894            | 13625472               | 9006005            | 18063063           |
| Saudi Arabia               | 1095326296          | 556249920          | 1618006666         | 164420297          | 81826659           | 232214029          | 1318455796             | 878768822          | 1733115765         |
| Somalia                    | 120468870           | 60936026           | 178646152          | 15829595           | 7780155            | 22577733           | 25266719               | 16723207           | 33448172           |
| Sudan                      | 80470537            | 40703999           | 119331088          | 70890348           | 34854917           | 101131564          | 51822010               | 34291173           | 68597861           |
| Syrian Arab Republic       | 238978098           | 120881449          | 354384451          | 33125510           | 16285604           | 47263990           | 86977859               | 57550471           | 115130664          |
| Tunisia                    | 52294875            | 26383699           | 77745625           | 14191393           | 6923911            | 20383044           | 23655207               | 15574346           | 31456622           |
| United Arab Emirates       | 312175587           | 158004888          | 462656742          | 37050972           | 18247463           | 52770709           | 109400429              | 72471649           | 144653359          |
| Yemen                      | *                   | *                  | *                  | 45980444           | 22607110           | 65603161           | 81068265               | 53646449           | 107305604          |
|                            | <b>Hypertension</b> |                    |                    | <b>Stroke</b>      |                    |                    | <b>Type 2 Diabetes</b> |                    |                    |
| <b>European Region</b>     | <b>Cost amount</b>  | <b>Lower limit</b> | <b>Upper limit</b> | <b>Cost amount</b> | <b>Lower limit</b> | <b>Upper limit</b> | <b>Cost amount</b>     | <b>Lower limit</b> | <b>Upper limit</b> |
| Albania                    | 19241121            | 9704473            | 28613464           | 2512052            | 1226060            | 3614013            | 549984                 | 361890             | 731781             |
| Andorra                    | *                   | *                  | *                  | 1722124            | 843553             | 2460014            | 34230                  | 22592              | 45339              |
| Armenia                    | 18951358            | 9540431            | 28239656           | 2106897            | 1021826            | 3049705            | 689246                 | 451907             | 920629             |
| Austria                    | 473588735           | 238913624          | 704136226          | 61407342           | 29940880           | 88222718           | 50363819               | 33153875           | 66993660           |
| Azerbaijan                 | 53164559            | 26814433           | 79061864           | 9338775            | 4549523            | 13430697           | 4459726                | 2934673            | 5933886            |



|                        |            |            |            |           |           |            |             |            |             |
|------------------------|------------|------------|------------|-----------|-----------|------------|-------------|------------|-------------|
| Belarus                | 69976478   | 35136287   | 104526013  | 12381790  | 5950398   | 18024058   | 3029670     | 1980037    | 4067821     |
| Belgium                | 554938077  | 280410843  | 823769622  | 47944858  | 23502753  | 68598419   | 65042675    | 42954096   | 86254534    |
| Bosnia and Herzegovina | 42416651   | 21369261   | 63149906   | 7003994   | 3399884   | 10102180   | 3086124     | 2026045    | 4115177     |
| Bulgaria               | 187403417  | 94774949   | 277958592  | 41118811  | 20203641  | 58703127   | 19404846    | 12830359   | 25696280    |
| Croatia                | 107161353  | 54075556   | 159283541  | 12027405  | 5870589   | 17277305   | 2803102     | 1846615    | 3726015     |
| Cyprus                 | 29537315   | 14963356   | 43737986   | 1007728   | 496794    | 1430995    | 1073734     | 712444     | 1417230     |
| Czechia                | 396269532  | 199966843  | 589012797  | 35378053  | 17265869  | 50793962   | 6598558     | 4351868    | 8773469     |
| Denmark                | 261653740  | 131935169  | 389211342  | 11358785  | 5527719   | 16328282   | 20823949    | 13699223   | 27712372    |
| Estonia                | 39046511   | 19707037   | 58023021   | 5651009   | 2754612   | 8109069    | 305401      | 201241     | 405879      |
| Finland                | 113098819  | 56831093   | 168816896  | 26109693  | 12576092  | 37924137   | 15406390    | 10061219   | 20641577    |
| France                 | 2900193402 | 1462731628 | 4313033095 | 152621828 | 74356443  | 219432591  | 1681749396  | 1106693545 | 2237753167  |
| Georgia                | 22053153   | 11086286   | 32904384   | 3446146   | 1660606   | 5002163    | 969102      | 633792     | 1297344     |
| Germany                | 6449199026 | 3264912702 | 9555808028 | 884492882 | 435981548 | 1259177030 | 14374335417 | 9526086818 | 18998691352 |
| Greece                 | 251156396  | 126983653  | 372613717  | 29177206  | 14324851  | 41674212   | 29350236    | 19400198   | 38880066    |
| Hungary                | 341142054  | 172517761  | 506000532  | 34299549  | 16847440  | 48964477   | 32155623    | 21266531   | 42581646    |
| Iceland                | 12385996   | 6246821    | 18417038   | 1073629   | 528196    | 1553893    | 98740       | 64980      | 132116      |
| Ireland                | 193404733  | 97643188   | 287343712  | 11596614  | 5686544   | 16625692   | 9326395     | 6148946    | 12386472    |
| Israel                 | 119856596  | 60453053   | 178243052  | 13197326  | 6431058   | 18972964   | 35912266    | 23633075   | 47767781    |
| Italy                  | 2979143742 | 1507844710 | 4415205669 | 346480668 | 170679983 | 493572817  | 3158660975  | 2092331267 | 4176490630  |
| Kazakhstan             | 133606536  | 67350175   | 198796030  | 22077696  | 10739098  | 31789663   | 27092332    | 17812146   | 36086088    |
| Kyrgyzstan             | 4459423    | 2238989    | 6661567    | 552002    | 265389    | 802769     | 158896      | 103803     | 213288      |
| Latvia                 | 45905450   | 23153980   | 68265224   | 3476747   | 1694387   | 4996729    | 427478      | 281073     | 569183      |
| Lithuania              | 71477186   | 36021321   | 106384511  | 6410465   | 3118221   | 9237229    | 729556      | 479681     | 972127      |
| Luxembourg             | 27200043   | 13713199   | 40455590   | 1942597   | 931485    | 2789647    | 462449      | 304292     | 615801      |
| Malta                  | 19063905   | 9647812    | 28251360   | 1087130   | 539111    | 1546893    | 175507      | 116282     | 231992      |

|                                                            |                     |                    |                    |                    |                    |                    |                        |                    |                    |
|------------------------------------------------------------|---------------------|--------------------|--------------------|--------------------|--------------------|--------------------|------------------------|--------------------|--------------------|
| Monaco                                                     | *                   | *                  | *                  | 124470             | 57777              | 176983             | 635                    | 419                | 913                |
| Montenegro                                                 | *                   | *                  | *                  | 2181588            | 1064388            | 3133769            | 6024148                | 3962566            | 8010977            |
| Netherlands                                                | 791894389           | 399154092          | 1178383594         | 73216583           | 35605391           | 105434733          | 154229639              | 101382258          | 205450557          |
| North Macedonia                                            | *                   | *                  | *                  | 4837596            | 2356809            | 6960137            | 808187                 | 532178             | 1075494            |
| Norway                                                     | 291353802           | 147047408          | 432993294          | 33095412           | 16155206           | 47498828           | 23440707               | 15450921           | 31154831           |
| Poland                                                     | 958668858           | 483962511          | 1424381043         | 60173560           | 29397323           | 86298933           | 258195966              | 170210891          | 342991628          |
| Portugal                                                   | 492183579           | 249252962          | 729022818          | 26070589           | 12867127           | 37073430           | 98799049               | 65519405           | 130503766          |
| Republic of Moldova                                        | 9861314             | 4947729            | 14741106           | 1338048            | 639934             | 1953875            | 277405                 | 180328             | 372339             |
| Romania                                                    | 446940984           | 225819493          | 663512106          | 69337883           | 33969044           | 99227968           | 42582459               | 28116153           | 56478211           |
| Russian Federation                                         | 1485257651          | 746419590          | 2216631646         | 260657397          | 125552896          | 378490026          | 1449556689             | 947388847          | 1941748386         |
| San Marino                                                 | *                   | *                  | *                  | 64041              | 33310              | 97333              | 220809                 | 143460             | 298157             |
| Serbia                                                     | 201330827           | 101844196          | 298538636          | 34611534           | 17014781           | 49374612           | 36761704               | 24327803           | 48656717           |
| Slovakia                                                   | 151017202           | 76290561           | 224225652          | 18299371           | 8963008            | 26197428           | 6638228                | 4381612            | 8806971            |
| Slovenia                                                   | 87318473            | 44079847           | 129748373          | 4354532            | 2127819            | 6244073            | 2399171                | 1579900            | 3185952            |
| Spain                                                      | 1210329762          | 609990240          | 1801243467         | 110618299          | 53774881           | 159369698          | 1555231322             | 1022030038         | 2072303440         |
| Sweden                                                     | 367249073           | 184886230          | 547135969          | 37785779           | 18291868           | 54589166           | 54408256               | 35684410           | 72645513           |
| Switzerland                                                | 390200361           | 196477078          | 581219833          | 35974990           | 17444636           | 51979889           | 63632174               | 41749767           | 84921468           |
| Tajikistan                                                 | 12762411            | 6436800            | 18979699           | 1307661            | 637357             | 1881141            | 876154                 | 576459             | 1165962            |
| Turkey                                                     | 948250526           | 478437217          | 1409668830         | 165905340          | 80927087           | 238286992          | 2658295088             | 1750665610         | 3534751869         |
| Turkmenistan                                               | 41113613            | 20735958           | 61140319           | 7478301            | 3642902            | 10747370           | 2460767                | 1619980            | 3275364            |
| Ukraine                                                    | 341430409           | 171712986          | 509185549          | 51097502           | 24667170           | 74042255           | 75772222               | 49587230           | 101359244          |
| United Kingdom of Great Britain and Northern Ireland (the) | 2390062461          | 1207765686         | 3547691260         | 232961935          | 114184579          | 333211716          | 5053749703             | 3337809116         | 6701314343         |
| Uzbekistan                                                 | 55253168            | 27784027           | 82412282           | 7596432            | 3665131            | 11010819           | 9446055                | 6180848            | 12640447           |
|                                                            | <b>Hypertension</b> |                    |                    | <b>Stroke</b>      |                    |                    | <b>Type 2 Diabetes</b> |                    |                    |
| <b>South-East Asia Region</b>                              | <b>Cost amount</b>  | <b>Lower limit</b> | <b>Upper limit</b> | <b>Cost amount</b> | <b>Lower limit</b> | <b>Upper limit</b> | <b>Cost amount</b>     | <b>Lower limit</b> | <b>Upper limit</b> |

|                                       |                     |                    |                    |                    |                    |                    |                        |                    |                    |
|---------------------------------------|---------------------|--------------------|--------------------|--------------------|--------------------|--------------------|------------------------|--------------------|--------------------|
| Bangladesh                            | 104535450           | 52700078           | 155527408          | 12573752           | 6117440            | 18099688           | 217838608              | 143238400          | 290107877          |
| Bhutan                                | 4254194             | 4254194            | 4254194            | 101494             | 49683              | 144605             | 8786                   | 8786               | 8786               |
| Democratic People's Republic of Korea | 54278950            | 27318069           | 80889320           | 20272133           | 9811847            | 29316204           | 50833266               | 33316379           | 67912377           |
| India                                 | 2923311758          | 1476414255         | 4341568849         | 257165544          | 125834761          | 368391855          | 26653830678            | 17585733702        | 35378757967        |
| Indonesia                             | 472111396           | 237645357          | 703461540          | 116854817          | 56577867           | 168912820          | 1918918595             | 1258092330         | 2562711471         |
| Maldives                              | 3845213             | 1940030            | 5716322            | 323512             | 158506             | 459956             | 33186                  | 21937              | 44129              |
| Myanmar                               | 42537574            | 21336873           | 63603448           | 4852630            | 2323064            | 7084226            | 19535859               | 12721220           | 26264908           |
| Nepal                                 | 16344821            | 8205088            | 24419613           | 994482             | 477344             | 1449315            | 2447730                | 1596152            | 3285613            |
| Sri Lanka                             | 81821058            | 41262057           | 121694432          | 11454620           | 5578426            | 16473830           | 25668172               | 16888775           | 34162669           |
| Thailand                              | 307985109           | 155120313          | 458641386          | 41524602           | 20141579           | 59925563           | 20702861               | 13588994           | 27619090           |
| Timor-Leste                           | 1116454             | 561350             | 1665938            | 239916             | 115435             | 346286             | 13223                  | 8659               | 17772              |
|                                       | <b>Hypertension</b> |                    |                    | <b>Stroke</b>      |                    |                    | <b>Type 2 Diabetes</b> |                    |                    |
| <b>Western Pacific Region</b>         | <b>Cost amount</b>  | <b>Lower limit</b> | <b>Upper limit</b> | <b>Cost amount</b> | <b>Lower limit</b> | <b>Upper limit</b> | <b>Cost amount</b>     | <b>Lower limit</b> | <b>Upper limit</b> |
| Australia                             | 1059720159          | 534645218          | 1575462618         | 75612790           | 36889995           | 108638225          | 352808544              | 232296357          | 469211400          |
| Brunei Darussalam                     | 5800918             | 2923191            | 8629596            | 496191             | 243772             | 717464             | 48929                  | 32121              | 65132              |
| Cambodia                              | 12271405            | 6155149            | 18349924           | 1401928            | 670462             | 2046874            | 1549932                | 1009871            | 2084116            |
| China                                 | 5322057198          | 2672237283         | 7949739696         | 1035991381         | 497568006          | 1508089207         | 183114180040           | 119472777169       | 245712842445       |
| Cook Islands                          | 171640              | 86134              | 256717             | 21448              | 9539               | 29871              | 2405                   | 1616               | 3219               |
| Fiji                                  | 1465564             | 736489             | 2187135            | 164792             | 78956              | 239544             | 137304                 | 89691              | 183795             |
| Japan                                 | 9427856             | 4763603            | 13995838           | 1236341743         | 605779795          | 1769011724         | 7263173550             | 4796068409         | 9633233968         |
| Kiribati                              | 11233129            | 5683563            | 16652657           | 2014268            | 991076             | 2871399            | 99505                  | 65883              | 131625             |
| Lao People's Democratic Republic      | 25380496            | 12752094           | 37887390           | 3014992            | 1451267            | 4381556            | 1574887                | 1028922            | 2110632            |
| Malaysia                              | 386788430           | 195619263          | 573655701          | 40957159           | 20129738           | 58462775           | 374521379              | 247746208          | 495885317          |
| Marshall Islands                      | 721243              | 364875             | 1067948            | 57501              | 27879              | 80974              | 4959                   | 3305               | 6613               |
| Micronesia (Federated States of)      | 1091910             | 551687             | 1621663            | 160658             | 82828              | 230841             | 3143477                | 2084404            | 4168422            |

|                   |           |           |           |           |          |           |            |           |            |
|-------------------|-----------|-----------|-----------|-----------|----------|-----------|------------|-----------|------------|
| Mongolia          | 12614882  | 6342283   | 18818561  | 1446086   | 697661   | 2099715   | 141309     | 92278     | 189246     |
| Nauru             | 290217    | 147309    | 430953    | 19284     | 6126     | 19456     | 53         | 39        | 69         |
| New Zealand       | 215474349 | 109088220 | 319248886 | 13862141  | 6843978  | 19727572  | 8802460    | 5835597   | 11632262   |
| Niue              | 42710     | 21926     | 64249     | *         | *        | *         | 43         | 21        | 55         |
| Palau             | *         | *         | *         | 78072     | 39104    | 106276    | 399        | 262       | 520        |
| Papua New Guinea  | 2835825   | 1424178   | 4235132   | 448716    | 215933   | 652799    | 1622592    | 1059086   | 2176415    |
| Philippines       | 363278394 | 183776916 | 538651279 | 49158796  | 24178490 | 70114330  | 375756596  | 248688802 | 497286477  |
| Republic of Korea | *         | *         | *         | 195194084 | 95635947 | 279327895 | 1196998061 | 790363573 | 1587623710 |
| Samoa             | 226747    | 113980    | 339167    | 30740     | 15753    | 44967     | 967        | 653       | 1312       |
| Singapore         | 221141458 | 111767499 | 328195414 | 22688370  | 11136420 | 32454181  | 24149512   | 15955044  | 32011858   |
| Solomon Islands   | 268455    | 135059    | 400563    | 41165     | 19950    | 59398     | 12063      | 7906      | 16189      |
| Tonga             | 162406    | 81551     | 242251    | 18283     | 8742     | 26255     | 753        | 513       | 1026       |
| Tuvalu            | 147525    | 74156     | 217989    | 10781     | 5841     | 15975     | 126        | 75        | 158        |
| Vanuatu           | 70191     | 35114     | 104871    | 7950      | 3927     | 11507     | 1073       | 716       | 1490       |
| Viet Nam          | 318262616 | 160334758 | 473838139 | 48057220  | 23329512 | 69308036  | 259535130  | 170423094 | 346080614  |

\*No cost estimates

**Table S9. Direct healthcare costs attributable to physical inactivity, by health outcomes and by country (in 1,000,000 INT\$), 2020-2030**

|                                  | Cancers                 | Coronary Health Disease | Depression             | Hypertension           | Stroke              | Type 2 Diabetes       |
|----------------------------------|-------------------------|-------------------------|------------------------|------------------------|---------------------|-----------------------|
| <b>African Region</b>            |                         |                         |                        |                        |                     |                       |
| Algeria                          | 102 (23.1 to 196.3)     | 170 (118.4 to 227.4)    | 2846 (110.8 to 5705.9) | 1093 (551.7 to 1622.8) | 169 (82.7 to 242.4) | 792 (522.6 to 1051.8) |
| Angola                           | 31 (6.8 to 62.1)        | 8 (5.3 to 10.4)         | 538 (20.2 to 1123.2)   | 137 (68.9 to 204.3)    | 20 (9.7 to 29)      | 55 (36 to 73.8)       |
| Benin                            | 1 (0.2 to 2.3)          | 0* (0.2 to 0.4)         | 15 (0.6 to 31.4)       | 6 (2.9 to 8.6)         | 1 (0.3 to 1)        | 0* (0.1 to 0.2)       |
| Botswana                         | 1 (0.2 to 2.1)          | 1 (0.8 to 1.6)          | 57 (2.2 to 117.9)      | 25 (12.8 to 38)        | 3 (1.6 to 4.9)      | 1 (0.7 to 1.5)        |
| Burkina Faso                     | 3 (0.5 to 5.6)          | 1 (0.5 to 0.9)          | 37 (1.4 to 77.1)       | 18 (8.9 to 26.4)       | 2 (0.9 to 2.6)      | 1 (0.6 to 1.2)        |
| Burundi                          | 3 (0.5 to 7.3)          | 0* (0.2 to 0.3)         | 13 (0.5 to 27.6)       | 6 (3.3 to 9.7)         | 1 (0.3 to 0.9)      | 0* (0.2 to 0.5)       |
| Cabo Verde                       | 0* (0 to 0.6)           | 0* (0.1 to 0.1)         | 4 (0.1 to 7.9)         | 0* (0 to 0)            | 0* (0.1 to 0.3)     | 0* (0 to 0)           |
| Cameroon                         | 8 (2.1 to 15.2)         | 2 (1.1 to 2.1)          | 99 (3.8 to 200.8)      | 30 (15.4 to 45.4)      | 4 (2.1 to 6.2)      | 10 (6.5 to 13.2)      |
| Central Africa Republic          | 0* (0.1 to 0.5)         | 0* (0 to 0.1)           | 4 (0.1 to 7.4)         | 2 (1.2 to 3.5)         | 0 (0.1 to 0.3)      | 0* (0.1 to 0.2)       |
| Chad                             | 2 (0.4 to 3.2)          | 0* (0.3 to 0.6)         | 30 (1.1 to 61.5)       | 10 (4.8 to 14.2)       | 1 (0.5 to 1.5)      | 1 (0.4 to 0.9)        |
| Comoros (The)                    | 0* (0 to 0.4)           | 0* (0 to 0)             | 1 (0.1 to 3)           | 1 (0.3 to 1)           | 0* (0 to 0.1)       | 0* (0 to 0)           |
| Congo                            | 1 (0.3 to 2.4)          | 0* (0.3 to 0.7)         | 34 (1.3 to 69)         | 1 (0.7 to 1.9)         | 1 (0.5 to 1.5)      | 0* (0.3 to 0.6)       |
| Côte d'Ivoire                    | 10 (2.4 to 18)          | 2 (1.4 to 2.6)          | 90 (3.5 to 181.5)      | 48 (24.3 to 71.5)      | 6 (2.9 to 8.5)      | 5 (3.3 to 6.6)        |
| Democratic Republic of the Congo | 11 (2.4 to 21.1)        | 1 (0.7 to 1.4)          | 78 (3 to 161.5)        | 19 (9.6 to 28.3)       | 11 (5.4 to 16)      | 6 (3.8 to 7.7)        |
| Equatorial Guinea                | 1 (0.1 to 1)            | 0* (0.2 to 0.4)         | 31 (1.2 to 64.8)       | 8 (4 to 11.8)          | 1 (0.3 to 0.9)      | 0* (0.1 to 0.2)       |
| Eritrea                          | No estimates in INT\$** |                         |                        |                        |                     |                       |
| Eswatini                         | 0* (0.1 to 0.6)         | 1 (0.4 to 0.8)          | 29 (1.1 to 58.4)       | 12 (6 to 17.7)         | 1 (0.7 to 2.1)      | 0* (0.1 to 0.2)       |
| Ethiopia                         | 27 (6.6 to 52.4)        | 3 (1.8 to 3.5)          | 186 (6.9 to 392.6)     | 89 (44.7 to 132.9)     | 5 (2.4 to 7.1)      | 27 (17.5 to 35.9)     |
| Gabon                            | 1 (0.3 to 2.1)          | 0* (0.3 to 0.6)         | 30 (1.1 to 60.5)       | 10 (5.2 to 15.4)       | 1 (0.5 to 1.6)      | 0* (0.3 to 0.7)       |
| Ghana                            | 20 (4.2 to 41.3)        | 4 (2.9 to 5.6)          | 203 (7.7 to 419.8)     | 5 (2.4 to 7)           | 10 (4.8 to 14.2)    | 9 (6.1 to 12.5)       |
| Gambia (The)                     | 0* (0.1 to 0.5)         | 0* (0.1 to 0.1)         | 7 (0.2 to 13.5)        | †                      | 0* (0.1 to 0.4)     | 0* (0 to 0)           |
| Guinea                           | 1 (0.1 to 2.9)          | 1 (0.4 to 0.7)          | 26 (1 to 54.9)         | 24 (12.2 to 36.3)      | 1 (0.6 to 1.7)      | 0* (0.2 to 0.4)       |
| Guinea-Bissau                    | 0* (0.1 to 0.6)         | 0* (0.1 to 0.1)         | 4 (0.2 to 9.4)         | 12 (5.8 to 17.2)       | 0* (0.1 to 0.3)     | 0* (0 to 0)           |
| Kenya                            | 21 (2.9 to 49.6)        | 2 (1.6 to 3.2)          | 157 (5.8 to 330.1)     | 3 (1.3 to 4)           | 6 (2.8 to 8.4)      | 19 (12.4 to 25.4)     |
| Lesotho                          | 0* (0 to 0.7)           | 0* (0.1 to 0.2)         | 7 (0.3 to 15.6)        | 48 (24.2 to 72.3)      | 0* (0.2 to 0.5)     | 0* (0 to 0.1)         |
| Liberia                          | 2 (0.4 to 3.8)          | 1 (0.4 to 0.9)          | 34 (1.3 to 69.7)       | 5 (2.8 to 8.2)         | 1 (0.6 to 1.8)      | 0* (0.2 to 0.3)       |
| Madagascar                       | 9 (1.8 to 19.4)         | 1 (0.7 to 1.4)          | 70 (2.6 to 146.3)      | 5 (2.4 to 7)           | 5 (2.3 to 6.9)      | 2 (1.6 to 3.2)        |
| Malawi                           | 6 (0.7 to 15.8)         | 1 (0.6 to 1.3)          | 47 (1.7 to 98.2)       | 35 (17.4 to 51.6)      | 2 (1 to 3.2)        | 2 (1.6 to 3.3)        |

|                                  |                         |                      |                        |                          |                        |                            |
|----------------------------------|-------------------------|----------------------|------------------------|--------------------------|------------------------|----------------------------|
| Mali                             | 7 (1.4 to 12.7)         | 1 (0.7 to 1.4)       | 41 (1.6 to 81.3)       | 23 (11.6 to 34)          | 3 (1.3 to 3.8)         | 1 (0.9 to 1.8)             |
| Mauritania                       | 4 (0.7 to 7.5)          | 1 (0.6 to 1.1)       | 28 (1.1 to 54.2)       | 74 (37.6 to 110.1)       | 2 (0.9 to 2.5)         | 0* (0.1 to 0.2)            |
| Mauritius                        | 4 (0.8 to 7.4)          | 1 (1 to 2)           | 50 (1.9 to 101)        | 82 (41.3 to 121.9)       | 5 (2.3 to 6.8)         | 2 (1.6 to 3.2)             |
| Mozambique                       | 2 (0.3 to 5.4)          | 0* (0.3 to 0.6)      | 26 (1 to 57)           | 1 (0.6 to 1.7)           | 2 (0.9 to 2.6)         | 1 (0.9 to 1.9)             |
| Namibia                          | 3 (0.6 to 4.9)          | 2 (1.4 to 2.7)       | 74 (2.9 to 147.7)      | 333 (168.1 to 494.4)     | 4 (1.9 to 5.5)         | 1 (0.9 to 1.8)             |
| Niger                            | 4 (0.7 to 7.5)          | 0* (0.3 to 0.5)      | 21 (0.8 to 43.8)       | 2 (0.8 to 2.5)           | 1 (0.5 to 1.6)         | 1 (0.7 to 1.4)             |
| Nigeria                          | 131 (34.2 to 237)       | 36 (25.1 to 48.5)    | 1702 (65.2 to 3472.1)  | 107 (53.8 to 158.7)      | 82 (39.9 to 118.2)     | 944 (620.4 to 1257.6)      |
| Rwanda                           | 2 (0.3 to 3.4)          | 0* (0.3 to 0.7)      | 38 (1.4 to 80.9)       | 207 (103.9 to 309.1)     | 1 (0.7 to 2)           | 1 (0.7 to 1.4)             |
| Sao Tome and Principe            | 0* (0 to 0.2)           | 0*                   | 0* (0 to 0.9)          | 15 (7.4 to 21.9)         | 0* (0 to 0.1)          | 0*                         |
| Senegal                          | 3 (0.6 to 6.3)          | 1 (0.6 to 1.3)       | 37 (1.4 to 77.3)       | 0* (0.1 to 0.3)          | 2 (1 to 2.9)           | 2 (1.2 to 2.5)             |
| Seychelles                       | †                       | 0* (0 to 0.1)        | 2 (0.1 to 3.2)         | 175 (88 to 261.1)        | 0* (0.2 to 0.4)        | 0*                         |
| Sierra Leone                     | 3 (0.7 to 5.3)          | 2 (1.3 to 2.5)       | 90 (3.3 to 189.7)      | 1 (0.3 to 0.9)           | 4 (2.1 to 6.2)         | 0* (0.3 to 0.6)            |
| South Africa                     | 126 (26.9 to 241.4)     | 85 (59.8 to 114.1)   | 3185 (125.4 to 6311.6) | 151 (76.5 to 224.4)      | 172 (84.7 to 246.2)    | 2749 (1818.2 to 3641.3)    |
| South Sudan                      | No estimates in INT\$** |                      |                        |                          |                        |                            |
| Togo                             | 0* (0.1 to 1)           | 0* (0.1 to 0.2)      | 7 (0.3 to 15.2)        | 3 (1.5 to 4.6)           | 0* (0.2 to 0.6)        | 0* (0 to 0.1)              |
| Uganda                           | 2 (0.4 to 5.4)          | 0* (0.3 to 0.7)      | 56 (2 to 122.6)        | 14 (6.9 to 20.7)         | 1 (0.6 to 1.9)         | 3 (2.1 to 4.3)             |
| United Republic of Tanzania      | 5 (0.7 to 12.3)         | 1 (0.5 to 1)         | 41 (1.5 to 89.6)       | 17 (8.5 to 25.4)         | 2 (0.9 to 2.7)         | 10 (6.3 to 13.1)           |
| Zambia                           | †                       | 2 (1.5 to 3)         | 136 (5.1 to 281.1)     | 59 (29.7 to 88)          | 5 (2.6 to 7.6)         | 14 (8.9 to 18.1)           |
| Zimbabwe                         | †                       | 2 (1.1 to 2.2)       | 53 (2 to 107.7)        | 28 (14.3 to 42.3)        | 3 (1.6 to 4.8)         | 4 (2.3 to 4.7)             |
| <b>Region of the Americas</b>    |                         |                      |                        |                          |                        |                            |
| Antigua and Barbuda              | †                       | 0* (0.1 to 0.2)      | 2 (0.1 to 3.6)         | 1 (0.7 to 2.1)           | 0* (0.1 to 0.2)        | 0*                         |
| Argentina                        | 193 (43.8 to 359.6)     | 107 (74.6 to 142)    | 2535 (100.7 to 4982.9) | 1816 (919.4 to 2691.8)   | 190 (93.8 to 271)      | 604 (400.2 to 798.6)       |
| Bahamas (The)                    | 4 (0.8 to 7)            | 1 (0.6 to 1.1)       | 12 (0.5 to 23.7)       | 8 (4.2 to 12.3)          | 1 (0.5 to 1.4)         | 0* (0.1 to 0.1)            |
| Barbados                         | 3 (0.5 to 4.6)          | 1 (0.5 to 0.9)       | 7 (0.3 to 14.2)        | 4 (2.1 to 6.1)           | 1 (0.3 to 0.8)         | 0* (0 to 0.1)              |
| Belize                           | 0* (0 to 0.4)           | 0* (0.1 to 0.3)      | 3 (0.1 to 6.9)         | 1 (0.7 to 2.1)           | 0* (0.1 to 0.2)        | 0* (0 to 0)                |
| Bolivia (Plurinational State of) | 10 (1.8 to 18.4)        | 2 (1.4 to 2.7)       | 185 (7.2 to 370.2)     | 65 (32.8 to 96.3)        | 8 (4 to 11.8)          | 18 (11.8 to 23.8)          |
| Brazil                           | 726 (157.4 to 1139.3)   | 277 (194.6 to 368.1) | 17203 (692 to 33379.2) | 8452 (4284.7 to 12506.4) | 1028 (508.9 to 1458.4) | 65243 (43348.1 to 86023.5) |
| Canada                           | 903 (194.7 to 1744)     | 124 (86.2 to 166.5)  | 1860 (71.5 to 3777.5)  | 1088 (548.5 to 1617.8)   | 137 (66.9 to 197.7)    | 872 (573.9 to 1161.4)      |
| Chile                            | 501 (83.3 to 1007.9)    | 27 (19 to 36.8)      | 900 (34.4 to 1837.5)   | 517 (260.5 to 769.2)     | 49 (24 to 71.1)        | 214 (140.5 to 284.9)       |
| Colombia                         | 156 (31.4 to 292.7)     | 87 (60.7 to 115.1)   | 1805 (72.1 to 3526.5)  | 1334 (675.6 to 1975.2)   | 134 (66.2 to 190.6)    | 2816 (1868.3 to 3719.1)    |
| Costa Rica                       | 10 (2 to 18.5)          | 6 (4.1 to 7.8)       | 186 (7.5 to 362.2)     | 96 (48.7 to 142.2)       | 8 (4.1 to 11.8)        | 30 (20.1 to 39.9)          |

|                                     |                          |                         |                            |                            |                       |                               |
|-------------------------------------|--------------------------|-------------------------|----------------------------|----------------------------|-----------------------|-------------------------------|
| Cuba                                |                          |                         |                            |                            |                       |                               |
| Dominica                            | †                        | 0* (0.1 to 0.1)         | 1 (0 to 1.8)               | 0*                         | 0* (0 to 0.1)         | 1 (0.4 to 0.9)                |
| Dominican Republic (The)            | 17 (3.8 to 32.5)         | 19 (13.6 to 25.9)       | 399 (15.7 to 788.5)        | 191 (96.5 to 283)          | 27 (13.3 to 38.7)     | 59 (38.8 to 77.6)             |
| Ecuador                             | 17 (3.1 to 33.3)         | 4 (2.6 to 5.1)          | 316 (12.1 to 645.3)        | 114 (57.5 to 169.7)        | 14 (7 to 20.8)        | 59 (38.7 to 78.4)             |
| El Salvador                         | 7 (1.2 to 13.4)          | 3 (2 to 3.8)            | 100 (3.9 to 200.1)         | 41 (20.5 to 60.4)          | 4 (2.1 to 6)          | 10 (6.3 to 12.7)              |
| Grenada                             | †                        | 0* (0.1 to 0.1)         | 1 (0 to 2.4)               | 1 (0.4 to 1.1)             | 0* (0 to 0.1)         | 0*                            |
| Guatemala                           | 15 (2.8 to 28.8)         | 4 (3.1 to 6)            | 234 (9.2 to 464.5)         | 83 (41.8 to 122.7)         | 8 (3.8 to 11.2)       | 95 (62.7 to 125.7)            |
| Guyana                              | 1 (0.2 to 1.9)           | 1 (0.5 to 0.9)          | 18 (0.7 to 35.7)           | 7 (3.3 to 9.7)             | 9 (4.5 to 13.1)       | 0* (0.2 to 0.4)               |
| Haiti                               | 11 (1.9 to 22.2)         | 5 (3.2 to 6.1)          | 111 (4.4 to 222.5)         | 41 (20.9 to 61.5)          | 7 (3.6 to 10.6)       | 18 (11.9 to 23.9)             |
| Honduras                            | 7 (1.2 to 14.2)          | 2 (1.6 to 3.1)          | 87 (3.4 to 174.6)          | 40 (20.5 to 60.1)          | 3 (1.6 to 4.8)        | 10 (6.7 to 13.4)              |
| Jamaica                             | 6 (1.3 to 12)            | 3 (1.9 to 3.7)          | 36 (1.4 to 72.6)           | 24 (12.3 to 36.3)          | 3 (1.6 to 4.8)        | 4 (2.6 to 5.2)                |
| Mexico                              | 145 (30.3 to 276.5)      | 112 (78.2 to 150.9)     | 4097 (157.7 to 8316.7)     | 1600 (806.8 to 2379.5)     | 164 (80.1 to 236.5)   | 17711 (11653 to 23572.8)      |
| Nicaragua                           | 7 (1.4 to 14.2)          | 3 (1.8 to 3.5)          | 106 (4.1 to 212)           | 51 (25.6 to 75.3)          | 4 (2.2 to 6.4)        | 10 (6.8 to 13.6)              |
| Panama                              | 71 (12.2 to 137.4)       | 5 (3.4 to 6.6)          | 143 (5.6 to 285.2)         | 89 (45.1 to 132.5)         | 10 (4.8 to 13.9)      | 7 (4.9 to 9.9)                |
| Paraguay                            | 12 (2.7 to 23.5)         | 3 (2.1 to 4.1)          | 234 (9.2 to 463.9)         | 123 (62.4 to 183)          | 14 (7.1 to 20.5)      | 14 (9 to 18)                  |
| Peru                                | 51 (9.2 to 99.7)         | 7 (5 to 9.6)            | 374 (14.6 to 747.9)        | 187 (94.3 to 277.1)        | 24 (11.8 to 34.6)     | 154 (101.7 to 204.4)          |
| Saint Kitts and Nevis               | †                        | 0* (0.1 to 0.1)         | 2 (0.1 to 3.6)             | 0*                         | 0* (0.1 to 0.2)       | 0*                            |
| Saint Lucia                         |                          |                         |                            |                            |                       |                               |
| Saint Vincent and the Grenadines    | †                        | 0* (0.1 to 0.1)         | 1 (0 to 2.6)               | 1 (0.4 to 1.2)             | 0* (0.1 to 0.2)       | 0*                            |
| Suriname                            | 5 (1.4 to 9.6)           | 12 (8.5 to 16.1)        | 239 (9.5 to 466.8)         | 100 (50.5 to 147.7)        | 14 (6.7 to 19.5)      | 3 (2 to 3.9)                  |
| Trinidad and Tobago                 | 38 (6.6 to 74.4)         | 7 (4.6 to 8.8)          | 87 (3.4 to 172.6)          | 50 (25.3 to 74.3)          | 6 (2.8 to 8.1)        | 2 (1.4 to 2.8)                |
| United States of America            | 6254 (1283.9 to 12043.7) | 2358 (1649.9 to 3144.5) | 61219 (2421.6 to 120784.1) | 23436 (11856.9 to 34746.6) | 3807 (1872.7 to 5428) | 469832 (310997.8 to 621684.2) |
| Uruguay                             | 52 (10.3 to 104.2)       | 6 (4.1 to 7.9)          | 118 (4.5 to 243)           | 86 (43.4 to 128.4)         | 12 (5.7 to 16.9)      | 4 (2.3 to 4.7)                |
| Venezuela (Bolivarian Republic of)  | No estimates in INT\$**  |                         |                            |                            |                       |                               |
| <b>Eastern Mediterranean Region</b> |                          |                         |                            |                            |                       |                               |
| Afghanistan                         | 27 (4.2 to 38.6)         | 18 (12.5 to 23.8)       | 508 (20.1 to 1004.2)       | 173 (87.6 to 256.9)        | 28 (13.6 to 39.4)     | 76 (50.4 to 100.8)            |
| Bahrain                             | 51 (10.5 to 103.2)       | 8 (5.9 to 11.2)         | 180 (7.1 to 356)           | 39 (19.8 to 57.9)          | 5 (2.4 to 6.9)        | 4 (2.6 to 5.2)                |
| Djibouti                            | 1 (0.1 to 1.6)           | 0* (0.1 to 0.1)         | 5 (0.2 to 9.6)             | 2 (0.8 to 2.4)             | 0* (0.1 to 0.3)       | 0*                            |
| Egypt                               | 244 (44.4 to 511.3)      | 397 (276.4 to 532.3)    | 5160 (199.7 to 10416.3)    | 2469 (1245.7 to 3669.6)    | 466 (227.6 to 669.7)  | 2009 (1323.3 to 2671)         |
| Iran (Islamic Republic of)          | 211 (39.6 to 412.1)      | 622 (433.4 to 832.3)    | 8635 (336 to 17331.4)      | 2652 (1338.9 to 3938.9)    | 433 (211.8 to 621.1)  | 5094 (3359.7 to 6765)         |
| Iraq                                | 50 (12.5 to 89.7)        | 53 (37 to 69.6)         | 927 (37.7 to 1777.9)       | 425 (215.9 to 628.3)       | 98 (48.6 to 138.2)    | 553 (368.1 to 726.8)          |

|                        |                         |                      |                         |                         |                      |                         |
|------------------------|-------------------------|----------------------|-------------------------|-------------------------|----------------------|-------------------------|
| Jordan                 | 5 (1 to 9.3)            | 5 (3.7 to 7.3)       | 107 (3.9 to 227.3)      | 27 (13.7 to 40.9)       | 7 (3.5 to 10.6)      | 20 (13.2 to 27.2)       |
| Kuwait                 | 182 (39.2 to 338.6)     | 43 (30.2 to 56)      | 892 (37.6 to 1656.6)    | 343 (174.6 to 504)      | 39 (19.6 to 54.3)    | 91 (61 to 118.7)        |
| Lebanon                | 10 (2.1 to 19)          | 23 (15.7 to 30.1)    | 306 (12 to 609.4)       | 142 (71.6 to 210.4)     | 19 (9.2 to 26.9)     | 34 (22.4 to 45)         |
| Libya                  | 12 (3.1 to 22.1)        | 28 (19.4 to 37.1)    | 531 (20.8 to 1057.2)    | 183 (92.6 to 271.9)     | 31 (15.4 to 45)      | 124 (82.1 to 164.8)     |
| Morocco                | 35 (7.1 to 69.3)        | 33 (22.9 to 44.4)    | 575 (22 to 1176.1)      | 230 (116.1 to 342.9)    | 37 (18.1 to 53.8)    | 185 (121.5 to 246.6)    |
| Oman                   | 72 (12.4 to 140.1)      | 10 (7.2 to 13.8)     | 279 (10.9 to 561.3)     | 87 (43.9 to 129.1)      | 9 (4.2 to 12.2)      | 8 (5.2 to 10.5)         |
| Pakistan               | 328 (55.2 to 692)       | 87 (60.5 to 116)     | 1858 (72.4 to 3724.4)   | 1377 (695.2 to 2044.6)  | 113 (55.3 to 162.1)  | 4808 (3171.9 to 6383.4) |
| Qatar                  | 14 (3 to 26.9)          | 11 (7.4 to 14.1)     | 403 (15.8 to 801)       | 93 (47 to 137.9)        | 8 (4 to 11.7)        | 24 (16.2 to 32.4)       |
| Saudi Arabia           | 695 (148.4 to 1288.9)   | 281 (197.9 to 371.8) | 7362 (300.4 to 14087.1) | 2547 (1293.4 to 3762.1) | 382 (190.3 to 539.9) | 3066 (2043.3 to 4029.8) |
| Somalia                | 5 (1.1 to 9.2)          | 10 (7.3 to 14)       | 722 (28.5 to 1427.6)    | 271 (137.1 to 401.9)    | 36 (17.5 to 50.8)    | 57 (37.6 to 75.2)       |
| Sudan                  | 29 (6.7 to 56.3)        | 25 (17.7 to 33.8)    | 548 (21.6 to 1082.7)    | 194 (98.4 to 288.4)     | 171 (84.2 to 244.4)  | 125 (82.9 to 165.8)     |
| Syrian Arab Republic   | No estimates in INT\$** |                      |                         |                         |                      |                         |
| Tunisia                | 23 (4.4 to 48.3)        | 45 (31.3 to 60.3)    | 738 (28.5 to 1492)      | 161 (81.1 to 238.9)     | 44 (21.3 to 62.6)    | 73 (47.9 to 96.7)       |
| United Arab Emirates   | 50 (11.3 to 92.1)       | 34 (23.9 to 45.5)    | 907 (36 to 1782.6)      | 574 (290.8 to 851.4)    | 68 (33.6 to 97.1)    | 201 (133.4 to 266.2)    |
| Yemen                  | No estimates in INT\$** |                      |                         |                         |                      |                         |
| <b>European Region</b> |                         |                      |                         |                         |                      |                         |
| Albania                | 8 (0.9 to 14)           | 3 (2 to 3.9)         | 33 (1.3 to 66.3)        | 49 (24.8 to 73.2)       | 6 (3.1 to 9.2)       | 1 (0.9 to 1.9)          |
| Andorra                | No estimates in INT\$** |                      |                         |                         |                      |                         |
| Armenia                | 9 (1.5 to 15.5)         | 9 (6.4 to 12.4)      | 68 (2.6 to 140.4)       | 59 (29.8 to 88.1)       | 7 (3.2 to 9.5)       | 2 (1.4 to 2.9)          |
| Austria                | 440 (80.1 to 756.9)     | 52 (36.4 to 70.2)    | 689 (26.6 to 1393.6)    | 543 (273.8 to 807)      | 70 (34.3 to 101.1)   | 58 (38 to 76.8)         |
| Azerbaijan             | 33 (4.3 to 60.6)        | 36 (24.9 to 48.1)    | 288 (11.1 to 583.1)     | 182 (92 to 271.2)       | 32 (15.6 to 46.1)    | 15 (10.1 to 20.4)       |
| Belarus                | 35 (5.7 to 63.4)        | 39 (26.7 to 52.5)    | 362 (13.4 to 767.3)     | 220 (110.7 to 329.3)    | 39 (18.7 to 56.8)    | 10 (6.2 to 12.8)        |
| Belgium                | 720 (124 to 1166.8)     | 43 (30 to 57.4)      | 996 (39 to 1985.6)      | 652 (329.3 to 967.4)    | 56 (27.6 to 80.6)    | 76 (50.4 to 101.3)      |
| Bosnia and Herzegovina | 13 (2.2 to 21.7)        | 8 (5.2 to 10.2)      | 83 (3.2 to 169.5)       | 109 (54.8 to 162)       | 18 (8.7 to 25.9)     | 8 (5.2 to 10.6)         |
| Bulgaria               | 35 (5.7 to 55.7)        | 39 (27.6 to 52.6)    | 156 (6.2 to 309.6)      | 457 (231 to 677.4)      | 100 (49.2 to 143.1)  | 47 (31.3 to 62.6)       |
| Croatia                | 101 (16.8 to 168.9)     | 13 (9.1 to 17.6)     | 122 (4.7 to 246.9)      | 218 (110.1 to 324.4)    | 24 (12 to 35.2)      | 6 (3.8 to 7.6)          |
| Cyprus                 | 32 (6 to 38.9)          | 2 (1.6 to 3)         | 49 (1.9 to 94.8)        | 42 (21.4 to 62.6)       | 1 (0.7 to 2)         | 2 (1 to 2)              |
| Czechia                | 386 (71.8 to 662.4)     | 32 (22 to 42.4)      | 409 (15.8 to 824.5)     | 719 (362.8 to 1068.6)   | 64 (31.3 to 92.2)    | 12 (7.9 to 15.9)        |
| Denmark                | 219 (39.4 to 391.1)     | 13 (9 to 17.3)       | 382 (14.7 to 776)       | 258 (130.1 to 383.9)    | 11 (5.5 to 16.1)     | 21 (13.5 to 27.3)       |
| Estonia                | 32 (5.7 to 56.1)        | 5 (3.8 to 7.2)       | 49 (1.9 to 97.7)        | 64 (32.2 to 94.7)       | 9 (4.5 to 13.2)      | 0 (0.3 to 0.7)          |
| Finland                | 68 (12.5 to 221)        | 16 (11 to 21.5)      | 174 (6.5 to 364.8)      | 117 (58.9 to 174.9)     | 27 (13 to 39.3)      | 16 (10.4 to 21.4)       |



|                     |                         |                      |                         |                          |                       |                            |
|---------------------|-------------------------|----------------------|-------------------------|--------------------------|-----------------------|----------------------------|
| France              | 3003 (577.1 to 5350.4)  | 178 (123.8 to 238.9) | 4329 (166.8 to 8778)    | 3491 (1760.8 to 5191.8)  | 184 (89.5 to 264.1)   | 2024 (1332.2 to 2693.7)    |
| Georgia             | 15 (2.4 to 40)          | 10 (7 to 13.7)       | 83 (3.1 to 173.8)       | 76 (38.4 to 113.9)       | 12 (5.7 to 17.3)      | 3 (2.2 to 4.5)             |
| Germany             | 6290 (1017.3 to 7947.9) | 680 (476.4 to 905.7) | 8788 (349.5 to 17246.6) | 7647 (3871.4 to 11330.9) | 1049 (517 to 1493.1)  | 17044 (11295.6 to 22527.9) |
| Greece              | 296 (44.5 to 390.3)     | 55 (38.7 to 74)      | 543 (21.3 to 1076.9)    | 398 (201.1 to 590.1)     | 46 (22.7 to 66)       | 46 (30.7 to 61.6)          |
| Hungary             | 312 (53.8 to 428.5)     | 50 (35.2 to 67.1)    | 477 (18.8 to 943.9)     | 706 (357.1 to 1047.3)    | 71 (34.9 to 101.3)    | 67 (44 to 88.1)            |
| Iceland             | 11 (2 to 19.9)          | 1 (0.6 to 1.1)       | 13 (0.5 to 25.7)        | 11 (5.7 to 16.7)         | 1 (0.5 to 1.4)        | 0* (0.1 to 0.1)            |
| Ireland             | 190 (35.2 to 317.1)     | 13 (8.9 to 17)       | 324 (12.6 to 651.9)     | 211 (106.7 to 314)       | 13 (6.2 to 18.2)      | 10 (6.7 to 13.5)           |
| Israel              | 238 (39.2 to 413.7)     | 8 (5.5 to 10.7)      | 267 (10.3 to 541.7)     | 107 (54 to 159.3)        | 12 (5.7 to 17)        | 32 (21.1 to 42.7)          |
| Italy               | 3304 (514.3 to 4108.3)  | 381 (266.7 to 507.5) | 4393 (174.3 to 8637.2)  | 3929 (1988.7 to 5823.3)  | 457 (225.1 to 651)    | 4166 (2759.6 to 5508.5)    |
| Kazakhstan          | 64 (10 to 138.6)        | 47 (32.4 to 62.6)    | 577 (22.1 to 1175.5)    | 392 (197.5 to 583)       | 65 (31.5 to 93.2)     | 79 (52.2 to 105.8)         |
| Kyrgyzstan          | 4 (0.5 to 18.9)         | 2 (1.7 to 3.4)       | 32 (1.2 to 68.5)        | 19 (9.5 to 28.2)         | 2 (1.1 to 3.4)        | 1 (0.4 to 0.9)             |
| Latvia              | 46 (7.4 to 84.1)        | 4 (3 to 5.8)         | 61 (2.3 to 123.1)       | 81 (41.1 to 121.2)       | 6 (3 to 8.9)          | 1 (0.5 to 1)               |
| Lithuania           | 79 (12.6 to 167.2)      | 9 (6.3 to 12.2)      | 86 (3.3 to 176)         | 137 (69.2 to 204.4)      | 12 (6 to 17.8)        | 1 (0.9 to 1.9)             |
| Luxembourg          | 27 (4.8 to 50.4)        | 2 (1.2 to 2.3)       | 53 (2 to 106.9)         | 28 (13.9 to 41)          | 2 (0.9 to 2.8)        | 0* (0.3 to 0.6)            |
| Malta               | 27 (4.5 to 33.8)        | 1 (0.8 to 1.6)       | 33 (1.3 to 65.1)        | 28 (14.4 to 42.2)        | 2 (0.8 to 2.3)        | 0* (0.2 to 0.3)            |
| Monaco              | No estimates in INT\$** |                      |                         |                          |                       |                            |
| Montenegro          | 2 (0.4 to 4.1)          | 3 (2.3 to 4.4)       | 40 (1.5 to 80.5)        | 0*                       | 6 (2.8 to 8.2)        | 16 (10.3 to 20.9)          |
| Netherlands         | 1022 (168.7 to 1688.3)  | 128 (88.9 to 172)    | 1313 (50.3 to 2676.8)   | 896 (451.5 to 1332.9)    | 83 (40.3 to 119.3)    | 174 (114.7 to 232.4)       |
| North Macedonia     | 79 (11.9 to 134.1)      | 4 (2.9 to 5.7)       | 52 (2 to 104.9)         | 0*                       | 14 (6.7 to 19.9)      | 2 (1.5 to 3.1)             |
| Norway              | 239 (43.5 to 390.9)     | 20 (13.7 to 26.3)    | 373 (14.4 to 750.9)     | 271 (136.8 to 402.9)     | 31 (15 to 44.2)       | 22 (14.4 to 29)            |
| Poland              | 1084 (170.9 to 1798.6)  | 83 (57.8 to 111)     | 1405 (54.6 to 2825.6)   | 2088 (1054.1 to 3102.3)  | 131 (64 to 188)       | 562 (370.7 to 747)         |
| Portugal            | 356 (60.9 to 451.6)     | 18 (12.9 to 24.5)    | 2906 (115.9 to 5685.8)  | 758 (383.8 to 1122.6)    | 40 (19.8 to 57.1)     | 152 (100.9 to 201)         |
| Republic of Moldova | 7 (1.1 to 33.5)         | 4 (2.7 to 5.2)       | 36 (1.3 to 76.7)        | 28 (14.1 to 42.2)        | 4 (1.8 to 5.6)        | 1 (0.5 to 1.1)             |
| Romania             | 110 (19.2 to 161.7)     | 37 (25.8 to 49.4)    | 519 (20.3 to 1036)      | 1111 (561.2 to 1649.1)   | 172 (84.4 to 246.6)   | 106 (69.9 to 140.4)        |
| Russian Federation  | 420 (84.5 to 1595.4)    | 549 (379.1 to 742.1) | 4525 (169 to 9492.5)    | 4372 (2197.4 to 6525.6)  | 767 (369.6 to 1114.2) | 4267 (2789 to 5716.3)      |
| San Marino          | No estimates in INT\$** |                      |                         |                          |                       |                            |
| Serbia              | 54 (9.3 to 69.4)        | 50 (35.3 to 67.3)    | 412 (16.3 to 814.4)     | 497 (251.5 to 737.4)     | 85 (42 to 121.9)      | 91 (60.1 to 120.2)         |
| Slovakia            | 176 (30.8 to 207.1)     | 20 (13.8 to 26.5)    | 144 (5.6 to 287.7)      | 246 (124.2 to 364.9)     | 30 (14.6 to 42.6)     | 11 (7.1 to 14.3)           |
| Slovenia            | 71 (12.6 to 118.2)      | 4 (2.8 to 5.4)       | 98 (3.8 to 196.4)       | 136 (68.7 to 202.2)      | 7 (3.3 to 9.7)        | 4 (2.5 to 5)               |
| Spain               | 1148 (191.7 to 1674.1)  | 138 (95.9 to 185.5)  | 2256 (86.4 to 4605.4)   | 1689 (851.2 to 2513.6)   | 154 (75 to 222.4)     | 2170 (1426.2 to 2891.8)    |
| Sweden              | 211 (36.7 to 463.7)     | 17 (11.7 to 22.7)    | 605 (23 to 1247.9)      | 387 (194.7 to 576.1)     | 40 (19.3 to 57.5)     | 57 (37.6 to 76.5)          |

|                                                            |                          |                      |                          |                          |                        |                               |
|------------------------------------------------------------|--------------------------|----------------------|--------------------------|--------------------------|------------------------|-------------------------------|
| Switzerland                                                | 363 (47.3 to 776.4)      | 26 (18.1 to 35.1)    | 579 (22 to 1192.7)       | 321 (161.9 to 478.8)     | 30 (14.4 to 42.8)      | 52 (34.4 to 70)               |
| Tajikistan                                                 | 8 (1 to 16.9)            | 6 (4.3 to 8.3)       | 70 (2.7 to 141.6)        | 57 (28.9 to 85.2)        | 6 (2.9 to 8.4)         | 4 (2.6 to 5.2)                |
| Turkey                                                     | 494 (80 to 821.6)        | 342 (238.2 to 458.9) | 7214 (278.9 to 14576.2)  | 3025 (1526.1 to 4496.6)  | 529 (258.1 to 760.1)   | 8480 (5584.4 to 11275.4)      |
| Turkmenistan                                               | No estimates in INT\$**  |                      |                          |                          |                        |                               |
| Ukraine                                                    | 184 (26.7 to 523.1)      | 211 (146.3 to 285.4) | 1700 (63.9 to 3541.6)    | 1197 (601.8 to 1784.5)   | 179 (86.5 to 259.5)    | 266 (173.8 to 355.2)          |
| United Kingdom of Great Britain and Northern Ireland (the) | 9300 (1837.2 to 14410.1) | 233 (162.6 to 311.3) | 6354 (248.8 to 12664.7)  | 2706 (1367.3 to 4016.3)  | 264 (129.3 to 377.2)   | 5721 (3778.7 to 7586.5)       |
| Uzbekistan                                                 | 29 (4.2 to 86.1)         | 31 (21.5 to 41.9)    | 319 (12 to 665.4)        | 244 (122.7 to 364.1)     | 34 (16.2 to 48.6)      | 42 (27.3 to 55.8)             |
| <b>South-East Asia Region</b>                              |                          |                      |                          |                          |                        |                               |
| Bangladesh                                                 | 216 (19 to 528.4)        | 26 (18.3 to 35.4)    | 660 (25.3 to 1342.7)     | 274 (138.2 to 407.8)     | 33 (16 to 47.5)        | 571 (375.6 to 760.7)          |
| Bhutan                                                     | 0* (0 to 0.4)            | 0* (0.5 to 0.5)      | 7 (7.2 to 7.2)           | 16 (15.8 to 15.8)        | 0 (0.2 to 0.5)         | 0 (0 to 0)                    |
| Democratic People's Republic of Korea                      | No estimates in INT\$**  |                      |                          |                          |                        |                               |
| India                                                      | 2369 (374.6 to 4925.3)   | 920 (642.1 to 1232)  | 15455 (602.5 to 30955.2) | 9846 (4972.9 to 14623.4) | 866 (423.8 to 1240.8)  | 89776 (59232.7 to 119163.7)   |
| Indonesia                                                  | 168 (41.7 to 223.7)      | 30 (21 to 40.7)      | 1330 (50.4 to 2746.1)    | 1473 (741.4 to 2194.7)   | 365 (176.5 to 527)     | 5987 (3925.1 to 7995.4)       |
| Maldives                                                   | 0* (0.1 to 0.8)          | 0* (0.1 to 0.3)      | 9 (0.4 to 18.6)          | 7 (3.8 to 11.1)          | 1 (0.3 to 0.9)         | 0 (0 to 0.1)                  |
| Myanmar                                                    | 21 (2.6 to 47.9)         | 5 (3.2 to 6.3)       | 117 (4.3 to 250.4)       | 144 (72 to 214.7)        | 16 (7.8 to 23.9)       | 66 (42.9 to 88.7)             |
| Nepal                                                      | 5 (0.7 to 10.3)          | 5 (3.5 to 6.9)       | 149 (5.5 to 316.5)       | 58 (29 to 86.2)          | 4 (1.7 to 5.1)         | 9 (5.6 to 11.6)               |
| Sri Lanka                                                  | 53 (7.9 to 114.3)        | 15 (10.1 to 19.5)    | 314 (12.1 to 637.7)      | 294 (148.3 to 437.2)     | 41 (20 to 59.2)        | 92 (60.7 to 122.7)            |
| Thailand                                                   | 103 (22.2 to 198.2)      | 29 (20.3 to 39.3)    | 777 (29.6 to 1595.9)     | 781 (393.5 to 1163.6)    | 105 (51.1 to 152)      | 53 (34.5 to 70.1)             |
| Timor-Leste                                                | 0 (0 to 0.3)             | 0* (0.1 to 0.2)      | 4 (0.2 to 8.6)           | 3 (1.6 to 4.8)           | 1 (0.3 to 1)           | 0 (0 to 0.1)                  |
| <b>Western Pacific Region</b>                              |                          |                      |                          |                          |                        |                               |
| Australia                                                  | 708 (155.5 to 1216)      | 126 (87.9 to 169.3)  | 1770 (68.4 to 3578.3)    | 1065 (537.3 to 1583.2)   | 76 (37.1 to 109.2)     | 355 (233.4 to 471.5)          |
| Brunei Darussalam                                          | 4 (0.7 to 7.4)           | 0* (0.2 to 0.5)      | 9 (0.3 to 17.8)          | 14 (7 to 20.6)           | 1 (0.6 to 1.7)         | 0* (0.1 to 0.2)               |
| Cambodia                                                   | 5 (0.8 to 9.1)           | 1 (0.6 to 1.1)       | 30 (1.1 to 65.1)         | 35 (17.6 to 52.6)        | 4 (1.9 to 5.9)         | 4 (2.9 to 6)                  |
| China                                                      | 1814 (249.3 to 3752.6)   | 399 (274.9 to 540.1) | 7814 (289.7 to 16540.3)  | 8778 (4407.5 to 13112)   | 1709 (820.7 to 2487.4) | 302021 (197053.4 to 405268.5) |
| Cook Islands                                               | No estimates in INT\$**  |                      |                          |                          |                        |                               |
| Fiji                                                       | 0* (0.1 to 0.9)          | 0* (0.1 to 0.2)      | 3 (0.1 to 6.6)           | 4 (1.8 to 5.2)           | 0* (0.2 to 0.6)        | 0* (0.2 to 0.4)               |
| Japan                                                      | 9298 (1235.3 to 17488)   | 436 (304.1 to 582.6) | 6 (0.2 to 11.2)          | 10 (5 to 14.8)           | 1304 (638.9 to 1865.7) | 7660 (5058.2 to 10159.8)      |
| Kiribati                                                   | †                        | 0* (0.3 to 0.5)      | 14 (0.6 to 27.5)         | 16 (8.2 to 24)           | 3 (1.4 to 4.1)         | 0* (0.1 to 0.2)               |
| Lao People's Democratic Republic                           | 1 (0.2 to 2.5)           | 1 (1 to 1.9)         | 47 (1.8 to 99.3)         | 42 (21.1 to 62.7)        | 5 (2.4 to 7.3)         | 3 (1.7 to 3.5)                |
| Malaysia                                                   | 39 (8.3 to 66.2)         | 20 (14.3 to 27.3)    | 688 (27.1 to 1361.5)     | 640 (323.9 to 949.8)     | 68 (33.3 to 96.8)      | 620 (410.2 to 821.1)          |
| Marshall Islands                                           | †                        | 0*                   | 0* (0 to 0.7)            | 1 (0.4 to 1.1)           | 0* (0 to 0.1)          | 0* (0 to 0)                   |

|                                  |                         |                   |                       |                       |                      |                         |
|----------------------------------|-------------------------|-------------------|-----------------------|-----------------------|----------------------|-------------------------|
| Micronesia (Federated States of) | 2 (0.3 to 2.8)          | 0*                | 1 (0 to 1.7)          | 1 (0.5 to 1.6)        | 0* (0.1 to 0.2)      | 3 (2.1 to 4.2)          |
| Mongolia                         | 4 (0.2 to 10)           | 3 (2 to 3.9)      | 49 (1.8 to 102.1)     | 38 (19.3 to 57.3)     | 4 (2.1 to 6.4)       | 0* (0.3 to 0.6)         |
| Nauru                            | †                       | 0*                | 0* (0 to 0.4)         | 0* (0.2 to 0.6)       | 0* (0 to 0)          | 0* (0 to 0)             |
| New Zealand                      | 122 (27.3 to 209.9)     | 19 (13.2 to 25.1) | 252 (10 to 494.2)     | 231 (117.1 to 342.7)  | 15 (7.3 to 21.2)     | 9 (6.3 to 12.5)         |
| Niue                             | No estimates in INT\$** |                   |                       |                       |                      |                         |
| Palau                            | †                       | 0*                | 1 (0 to 1)            | 0*                    | 0* (0 to 0.1)        | 0*                      |
| Papua New Guinea                 | 2 (0.4 to 4.9)          | 0* (0.1 to 0.2)   | 5 (0.2 to 10.6)       | 4 (2.2 to 6.6)        | 1 (0.3 to 1)         | 3 (1.6 to 3.4)          |
| Philippines                      | 151 (36.5 to 261)       | 40 (27.7 to 52.8) | 866 (34.2 to 1709.8)  | 924 (467.4 to 1369.9) | 125 (61.5 to 178.3)  | 956 (632.5 to 1264.7)   |
| Republic of Korea                | 533 (59.6 to 1031.1)    | 74 (51.7 to 99)   | 1854 (72.5 to 3700.2) | 0*                    | 279 (136.9 to 399.8) | 1713 (1131.3 to 2272.4) |
| Samoa                            | 0* (0 to 0.2)           | 0*                | 0* (0 to 0.7)         | 0* (0.2 to 0.6)       | 0* (0 to 0.1)        | 0*                      |
| Singapore                        | 121 (25.1 to 213.6)     | 17 (12 to 23)     | 307 (12 to 610.6)     | 364 (184.1 to 540.7)  | 37 (18.3 to 53.5)    | 40 (26.3 to 52.7)       |
| Solomon Islands                  | 0* (0 to 0.1)           | 0*                | 0* (0 to 0.8)         | 0* (0.2 to 0.5)       | 0* (0 to 0.1)        | 0*                      |
| Tonga                            | †                       | 0*                | 0* (0 to 0.4)         | 0* (0.1 to 0.3)       | 0*                   | 0*                      |
| Tuvalu                           | †                       | 0*                | 0* (0 to 0.2)         | 0* (0.1 to 0.2)       | 0*                   | 0*                      |
| Vanuatu                          | 0*                      | 0*                | 0* (0 to 0.2)         | 0* (0 to 0.1)         | 0*                   | 0*                      |
| Viet Nam                         | 122 (21.3 to 233.4)     | 26 (17.9 to 34.7) | 581 (22.2 to 1190.5)  | 988 (497.9 to 1471.3) | 149 (72.4 to 215.2)  | 806 (529.2 to 1074.6)   |

\*Not zero costs, please see Table S8, for more details

\*\* No estimates in INT\$ (no available conversion rates for these countries), but available estimates in US\$. Please, see Table S8

† No cost estimates

**Table S10. Direct healthcare costs attributable to physical inactivity, by health outcomes, WHO regions and World Bank income classification (in US\$), 2020-2030**

|                                    | <b>Breast cancer</b> | <b>Colorectal cancer</b> | <b>Endometrial cancer</b> | <b>Gastric cancer</b> | <b>Oesophageal cancer</b> |
|------------------------------------|----------------------|--------------------------|---------------------------|-----------------------|---------------------------|
| African Region (AFR)               | 0.02 (0.01 to 0.04)  | 0.02 (0.01 to 0.04)      | 0.02 (-0.01 to 0.05)      | 0.05 (-0.01 to 0.11)  | 0.05 (-0.03 to 0.15)      |
| Region of the Americas (AMR)       | 0.04 (0.01 to 0.06)  | 0.04 (0.01 to 0.06)      | 0.04 (-0.02 to 0.09)      | 0.09 (-0.03 to 0.19)  | 0.09 (-0.06 to 0.25)      |
| Eastern Mediterranean Region (EMR) | 0.04 (0.01 to 0.06)  | 0.04 (0.01 to 0.07)      | 0.04 (-0.02 to 0.09)      | 0.1 (-0.03 to 0.21)   | 0.1 (-0.06 to 0.27)       |
| European Region (EUR)              | 0.03 (0.01 to 0.05)  | 0.03 (0.01 to 0.05)      | 0.03 (-0.01 to 0.07)      | 0.07 (-0.02 to 0.17)  | 0.08 (-0.05 to 0.22)      |
| South-East Asia Region (SEAR)      | 0.03 (0.01 to 0.05)  | 0.02 (0.01 to 0.03)      | 0.03 (-0.02 to 0.08)      | 0.06 (-0.02 to 0.13)  | 0.06 (-0.03 to 0.18)      |
| Western Pacific Region (WPR)       | 0.02 (0.01 to 0.03)  | 0.03 (0.01 to 0.05)      | 0.02 (-0.01 to 0.04)      | 0.08 (-0.02 to 0.17)  | 0.08 (-0.05 to 0.23)      |
| Low-income                         | 0.02 (0.01 to 0.03)  | 0.02 (0 to 0.03)         | 0.02 (-0.01 to 0.04)      | 0.04 (-0.01 to 0.1)   | 0.04 (-0.02 to 0.13)      |
| Lower-middle-income                | 0.03 (0.01 to 0.05)  | 0.03 (0.01 to 0.05)      | 0.03 (-0.02 to 0.08)      | 0.07 (-0.02 to 0.17)  | 0.08 (-0.05 to 0.22)      |
| Upper-middle-income                | 0.02 (0.01 to 0.03)  | 0.02 (0.01 to 0.04)      | 0.02 (-0.01 to 0.05)      | 0.06 (-0.02 to 0.13)  | 0.06 (-0.03 to 0.18)      |
| High-income                        | 0.04 (0.01 to 0.06)  | 0.04 (0.01 to 0.06)      | 0.04 (-0.02 to 0.08)      | 0.09 (-0.03 to 0.2)   | 0.09 (-0.06 to 0.26)      |

(continued from previous Table)

|                                    | <b>Renal cancer</b> | <b>Bladder cancer</b> | <b>Stroke</b>       | <b>Coronary Heart Disease</b> | <b>Type 2 diabetes</b> |
|------------------------------------|---------------------|-----------------------|---------------------|-------------------------------|------------------------|
| African Region (AFR)               | 0.05 (0.01 to 0.09) | 0.01 (-0.01 to 0.04)  | 0.03 (0.02 to 0.05) | 0.03 (0.02 to 0.05)           | 0.03 (0.02 to 0.04)    |
| Region of the Americas (AMR)       | 0.09 (0.02 to 0.16) | 0.03 (-0.03 to 0.08)  | 0.06 (0.03 to 0.09) | 0.06 (0.04 to 0.08)           | 0.06 (0.04 to 0.07)    |
| Eastern Mediterranean Region (EMR) | 0.1 (0.02 to 0.18)  | 0.03 (-0.03 to 0.09)  | 0.07 (0.03 to 0.1)  | 0.07 (0.05 to 0.09)           | 0.06 (0.04 to 0.08)    |
| European Region (EUR)              | 0.08 (0.02 to 0.14) | 0.02 (-0.02 to 0.07)  | 0.05 (0.03 to 0.08) | 0.05 (0.04 to 0.07)           | 0.05 (0.03 to 0.06)    |
| South-East Asia Region (SEAR)      | 0.06 (0.01 to 0.11) | 0.02 (-0.02 to 0.05)  | 0.04 (0.02 to 0.06) | 0.04 (0.03 to 0.05)           | 0.04 (0.02 to 0.05)    |
| Western Pacific Region (WPR)       | 0.08 (0.02 to 0.14) | 0.02 (-0.02 to 0.07)  | 0.05 (0.03 to 0.08) | 0.05 (0.04 to 0.07)           | 0.05 (0.03 to 0.07)    |
| Low-income                         | 0.04 (0.01 to 0.08) | 0.01 (-0.01 to 0.04)  | 0.03 (0.01 to 0.04) | 0.03 (0.02 to 0.04)           | 0.03 (0.02 to 0.04)    |
| Lower-middle-income                | 0.08 (0.02 to 0.14) | 0.02 (-0.02 to 0.07)  | 0.05 (0.03 to 0.08) | 0.05 (0.04 to 0.07)           | 0.05 (0.03 to 0.06)    |
| Upper-middle-income                | 0.06 (0.01 to 0.11) | 0.02 (-0.02 to 0.05)  | 0.04 (0.02 to 0.06) | 0.04 (0.03 to 0.06)           | 0.04 (0.02 to 0.05)    |
| High-income                        | 0.09 (0.02 to 0.17) | 0.03 (-0.03 to 0.08)  | 0.07 (0.03 to 0.09) | 0.07 (0.05 to 0.09)           | 0.06 (0.04 to 0.08)    |

(continued from previous Table)

|                      | <b>Depression</b> | <b>Hypertension</b> | <b>Dementia</b>     |
|----------------------|-------------------|---------------------|---------------------|
| African Region (AFR) | 0.05 (0 to 0.1)   | 0.01 (0.01 to 0.02) | 0.08 (0.04 to 0.13) |

|                                    |                  |                     |                     |
|------------------------------------|------------------|---------------------|---------------------|
| Region of the Americas (AMR)       | 0.09 (0 to 0.18) | 0.02 (0.01 to 0.03) | 0.14 (0.07 to 0.22) |
| Eastern Mediterranean Region (EMR) | 0.1 (0 to 0.2)   | 0.02 (0.01 to 0.03) | 0.12 (0.07 to 0.2)  |
| European Region (EUR)              | 0.08 (0 to 0.15) | 0.02 (0.01 to 0.03) | 0.11 (0.06 to 0.17) |
| South-East Asia Region (SEAR)      | 0.06 (0 to 0.12) | 0.01 (0.01 to 0.02) | 0.11 (0.06 to 0.18) |
| Western Pacific Region (WPR)       | 0.08 (0 to 0.16) | 0.02 (0.01 to 0.03) | 0.07 (0.04 to 0.12) |
| Low-income                         | 0.04 (0 to 0.09) | 0.01 (0 to 0)       | 0.06 (0.03 to 0.1)  |
| Lower-middle-income                | 0.08 (0 to 0.16) | 0.02 (0.01 to 0.03) | 0.11 (0.06 to 0.17) |
| Upper-middle-income                | 0.06 (0 to 0.12) | 0.01 (0.01 to 0.02) | 0.08 (0.04 to 0.14) |
| High-income                        | 0.09 (0 to 0.19) | 0.02 (0.01 to 0.03) | 0.13 (0.07 to 0.2)  |

**Table S11. Sensitivity analysis: varying costs of incident cases by -30% and -50%, by WHO Regions and World Bank income classification, in US\$, 2020-2030**

|                                  | Cancers               | Coronary Heart Diseases | Dementia           | Depression         | Hypertension       | Stroke            | Type 2 Diabetes    |
|----------------------------------|-----------------------|-------------------------|--------------------|--------------------|--------------------|-------------------|--------------------|
| <b>WHO Regions</b>               | Varying costs in -30% |                         |                    |                    |                    |                   |                    |
| African Region                   | 101296419             | 38110049                | 105091164          | 1780521012         | 844258142          | 84806034          | 310750762          |
| Region of the Americas           | 3396574801            | 502391184               | 19938850239        | 13470478512        | 7542898928         | 937463778         | 11655740606        |
| Eastern Mediterranean Region     | 2055049410            | 805926598               | 254254000          | 12467606437        | 6353254946         | 903987320         | 1134353119         |
| European Region                  | 10319628119           | 1598213174              | 9490601206         | 31172577599        | 17393085264        | 2130541866        | 3494534709         |
| South-East Asia Region           | 372824859             | 266168829               | 2383278747         | 4261022174         | 3505892742         | 379618555         | 370195397          |
| Western Pacific region           | 8259380610            | 808927840               | 10308031028        | 13042979150        | 12423918354        | 2955375454        | 4315298412         |
| <b>World Bank classification</b> |                       |                         |                    |                    |                    |                   |                    |
| Low                              | 35570294              | 8735467                 | 36534143           | 419414047          | 198260483          | 20679916          | 32577132           |
| Lower-middle                     | 615382836             | 426090796               | 1641564394         | 7598323663         | 4972297262         | 604569313         | 1037873343         |
| Upper-middle                     | 2450578456            | 742795246               | 7544940840         | 12846260174        | 9182009978         | 1986257959        | 4420165853         |
| High                             | 28572419260           | 2135254933              | 37669860166        | 45869840487        | 31303406187        | 3400198088        | 13293652917        |
| <b>Total Global</b>              | <b>31673950846</b>    | <b>3312876442</b>       | <b>46892899542</b> | <b>66733838370</b> | <b>45655973910</b> | <b>6011705275</b> | <b>18784269246</b> |
| <b>WHO Regions</b>               | Varying costs in -50% |                         |                    |                    |                    |                   |                    |
| African Region                   | 72354585              | 27221464                | 75065117           | 1271809478         | 603041530          | 60575738          | 221962891          |
| Region of the Americas           | 2426124858            | 358850845               | 14242035885        | 9621836605         | 5387784949         | 669616984         | 8325533005         |
| Eastern Mediterranean Region     | 1467892435            | 575661856               | 181610000          | 8905494477         | 4538039247         | 645705229         | 810257795          |
| European Region                  | 7371162942            | 1141580839              | 6779000861         | 17069381771        | 12423632331        | 1521815619        | 2496098843         |
| South-East Asia Region           | 266303471             | 190120592               | 1702341962         | 3043608220         | 2504209101         | 271156111         | 264433367          |
| Western Pacific region           | 5899557579            | 577805600               | 7362879306         | 9316477815         | 8874227395         | 2110982467        | 3082338009         |
| <b>World Bank classification</b> |                       |                         |                    |                    |                    |                   |                    |
| Low                              | 25407353              | 6239620                 | 26095816           | 299583525          | 141614631          | 14771368          | 23269380           |
| Lower-middle                     | 439559169             | 304350568               | 1172545995         | 5427411409         | 3551640902         | 431835224         | 741338102          |
| Upper-middle                     | 1750413183            | 530568033               | 5389243457         | 9046890094         | 6558578555         | 1418755685        | 3157261324         |
| High                             | 20408870900           | 1525182095              | 26907042976        | 27138421036        | 22359575848        | 2428712920        | 9495466369         |
| <b>Total Global</b>              | <b>22624250605</b>    | <b>2366340316</b>       | <b>33494928245</b> | <b>41912306063</b> | <b>32611409936</b> | <b>4294075197</b> | <b>13417335175</b> |

## Appendix 1. WHO Regions and countries

### **WHO regions (194 countries)**

#### **African Region (AFRO): 47 countries**

Algeria, Angola, Benin, Botswana, Burkina Faso, Burundi, Cabo Verde, Cameroon, Central African Republic, Chad, Comoros (the), Congo, Côte d'Ivoire, Democratic Republic of the Congo, Equatorial Guinea, Eritrea, Eswatini, Ethiopia, Gabon, Ghana, Guinea, Guinea-Bissau, Kenya, Lesotho, Liberia, Madagascar, Malawi, Mali, Mauritania, Mauritius, Mozambique, Namibia, Niger, Nigeria, Rwanda, Sao Tome and Principe, Senegal, Seychelles, Sierra Leone, South Africa, South Sudan, the Gambia, Togo, Uganda, United Republic of Tanzania, Zambia, and Zimbabwe.

#### **Region of the Americas (AMRO): 35 countries**

Antigua and Barbuda, Argentina, Bahamas (the), Barbados, Belize, Bolivia (Plurinational State of), Brazil, Canada, Chile, Colombia, Costa Rica, Cuba, Dominica, Dominican Republic (the), Ecuador, El Salvador, Grenada, Guatemala, Guyana, Haiti, Honduras, Jamaica, Mexico, Nicaragua, Panama, Paraguay, Peru, Saint Kitts and Nevis, Saint Lucia, Saint Vincent and the Grenadines, Suriname, Trinidad and Tobago, United States of America, Uruguay, and Venezuela (Bolivarian Republic of).

#### **South-East Asia Region (SEARO): 11 countries**

Bangladesh, Bhutan, Democratic People's Republic of Korea, India, Indonesia, Maldives, Myanmar, Nepal, Sri Lanka, Thailand, and Timor-Leste.

#### **European Region (EURO): 53 countries**

Albania, Andorra, Armenia, Austria, Azerbaijan, Belarus, Belgium, Bosnia and Herzegovina, Bulgaria, Croatia, Cyprus, Czechia, Denmark, Estonia, Finland, France, Georgia, Germany, Greece, Hungary, Iceland, Ireland, Israel, Italy, Kazakhstan, Kyrgyzstan, Latvia, Lithuania, Luxembourg, Malta, Monaco, Montenegro, Netherlands, North Macedonia, Norway, Poland, Portugal, Republic of Moldova, Romania, Russian Federation, San Marino, Serbia, Slovakia, Slovenia, Spain, Sweden, Switzerland, Tajikistan, Turkey, Turkmenistan, Ukraine, United Kingdom of Great Britain and Northern Ireland (the), and Uzbekistan.

#### **Eastern Mediterranean Region (EMRO): 21 countries**

Afghanistan, Bahrain, Djibouti, Egypt, Iran (Islamic Republic of), Iraq, Jordan, Kuwait, Lebanon, Libya, Morocco, Oman, Pakistan, Qatar, Saudi Arabia, Somalia, Sudan, Syrian Arab Republic, Tunisia, United Arab Emirates, and Yemen.

#### **Western Pacific Region (WPRO): 27 countries**

Australia, Brunei Darussalam, Cambodia, China, Cook Islands, Fiji, Japan, Kiribati, Lao People's Democratic Republic, Malaysia, Marshall Islands, Micronesia (Federated States of), Mongolia, Nauru, New Zealand, Niue, Palau, Papua New Guinea, Philippines, Republic of Korea, Samoa, Singapore, Solomon Islands, Tonga, Tuvalu, Vanuatu, and Viet Nam.

## Appendix 2. Estimating the costs for diabetes complications: the approach used to avoid double counting

IDF's direct healthcare costs estimates for diabetes account for complications of diabetes related to coronary heart diseases and stroke. To subtract these costs from the total costs by county, WHO Regions and World Bank income levels, we estimated the number of incident cases due to (1) patients with diabetes and coronary heart disease, (2) diabetes and stroke and (3) diabetes and coronary heart disease and stroke, and subtracted the costs associated to these comorbidities from the total costs. To illustrate the approach used, we show here the example of SEARO:

The risk of diabetes (incidence proportion) in the total population ( $R_{dt} = 0.0010726$ ) for both sexes was estimated by dividing the total number of new cases of diabetes in SEARO (1,414,955) by the total population of SEARO (1,319,203,305). The same calculation was used for the risk of stroke ( $R_{st}$ ) and coronary heart disease ( $R_{chdt}$ ) in the total population: 0.0017706 ( $R_{st}$ ) and 0.0043688 ( $R_{chdt}$ ), respectively.

The risk of stroke among those without diabetes ( $R_{s/nd}$ ) was derived as:

- 1) the risk in the total population ( $R_{st}$ ) was considered as the weighted average of the risk in diabetics and non-diabetics:
  - a. (risk in diabetics x proportion with diabetics) +
  - b. (risk in non-diabetics ( $R_{s/nd}$ ) x proportion without diabetics);
- 2) the proportion of individuals with diabetes was the  $R_{dt}$
- 3) the proportion of non-diabetics =  $(1 - R_{dt})$
- 4) the risk among diabetics was the  $R_{s/nd}$  multiplied by the relative risk for stroke by comparing diabetics to non-diabetics ( $RR_s$ )
- 5) therefore,  $R_{st} = (RR_s \times R_{dt} \times R_{s/nd}) + ((1 - R_{dt}) \times R_{s/nd})$
- 6) rearranging the formula,  $R_{s/nd} = \frac{R_{st}}{(RR_s \times R_{dt}) + (1 - R_{dt})}$
- 7) if  $R_{dt} = 0.0010726$ ,  $R_{st} = 0.0017706$ , and  $RR_s = 2.0$ , as in Sarwar and colleagues (2010)<sup>36</sup>, the  $R_{s/nd} = 0.0017687$ , and  $R_{s/d} = 0.0017687 \times 2.0 = 0.0035373$
- 8) We then repeated the same calculation for coronary heart disease (and all WHO Regions and World Bank income level), and the results are presented in the table below, for the region SEARO, as an example.

| Parameter                                  |             | Numerical value |
|--------------------------------------------|-------------|-----------------|
| Total population                           | Pop         | 1,319,203,305   |
| New cases of diabetes                      |             | 1,414,956       |
| Risk of diabetes/population                | $R_{dt}$    | 0.0010726       |
| $1 - R_{dt}$                               | $R_{ndt}$   | 0.9989274       |
| New cases of ischemic stroke               |             | 2,335,732       |
| Risk of stroke in the total population     | $R_{st}$    | 0.0017706       |
| $1 - R_{st}$                               | $R_{nst}$   | 0.9982294       |
| Relative risk for stroke among diabetics   | $RR_s$      | 2.00            |
| Risk of stroke among diabetics             | $R_{s/d}$   | 0.0035373       |
| Risk of stroke among non-diabetics         | $R_{s/nd}$  | 0.0017687       |
| New cases of coronary heart diseases (CHD) |             | 5,763,323       |
| Risk of CHD in the total population        | $R_{chdt}$  | 0.0043688       |
| $1 - R_{chdt}$                             |             | 0.9956312       |
| Relative risk of CHD among diabetics       | $RR_{chd}$  | 2.00            |
| $R_{chd}$ given diabetes                   | $R_{chd/d}$ | 0.0087282       |



|                                   |                     |           |
|-----------------------------------|---------------------|-----------|
| $R_{\text{chd}}$ without diabetes | $R_{\text{chd/nd}}$ | 0.0043641 |
|-----------------------------------|---------------------|-----------|

Assuming there is no interaction, the individuals with diabetes would be divided in four groups, as below.

| Subgroups of diabetics             | Stroke | CHD | Formula                                                                 |
|------------------------------------|--------|-----|-------------------------------------------------------------------------|
| 1) Diabetics without chd or stroke | No     | No  | $(R_{\text{dt}}) \times (1-R_{\text{chd/d}}) \times (1-R_{\text{s/d}})$ |
| 2) Diabetics with stroke           | Yes    | No  | $(R_{\text{dt}}) \times R_{\text{s/d}} \times (1-R_{\text{chd/d}})$     |
| 3) Diabetics with chd              | No     | Yes | $(R_{\text{dt}}) \times (1-R_{\text{s/d}}) \times (R_{\text{chd/d}})$   |
| 4) Diabetics with chd and stroke   | Yes    | Yes | $(R_{\text{dt}}) \times R_{\text{s/d}} \times R_{\text{chd/d}}$         |

The number of individuals with interacting diseases by WHO Region and World Bank income classification would then be:

| Reference                                        | WHO Regions |            |            |             |             |            | World Bank income Group |              |              |             | TOTAL Global |
|--------------------------------------------------|-------------|------------|------------|-------------|-------------|------------|-------------------------|--------------|--------------|-------------|--------------|
|                                                  | SEAR        | EMR        | AMR        | EUR         | WPR         | AFR        | Low                     | Lower-middle | Upper-middle | High        |              |
| Diabetics with stroke                            | 347         | 40         | 46         | 440         | 1070        | 53         | 26                      | 920          | 782          | 802         | 2530         |
| Diabetics with coronary heart disease            | 855         | 130        | 85         | 1188        | 1014        | 79         | 37                      | 2241         | 1024         | 1779        | 5081         |
| Diabetics with stroke and coronary heart disease | 0.12        | 0.03       | 0.02       | 0.31        | 0.37        | 0.01       | 0                       | 0.45         | 0.25         | 0.45        | 1            |
| <b>TOTAL</b>                                     | <b>1202</b> | <b>170</b> | <b>131</b> | <b>1628</b> | <b>2084</b> | <b>132</b> | <b>63</b>               | <b>3162</b>  | <b>1806</b>  | <b>2582</b> | <b>7612</b>  |

The total cost for individuals with interacting diseases by WHO Region and World Bank income classification would be:

| Reference                                        | WHO Regions   |               |               |                |                |              | World Bank income Group |                     |                     |                | TOTAL Global   |
|--------------------------------------------------|---------------|---------------|---------------|----------------|----------------|--------------|-------------------------|---------------------|---------------------|----------------|----------------|
|                                                  | SEAR          | EMR           | AMR           | EUR            | WPR            | AFR          | Low-income              | Lower-middle income | Upper-middle income | High-income    |                |
| Diabetics with stroke                            | 199868        | 92186         | 84804         | 1353233        | 1588023        | 24339        | 4892                    | 408006              | 817219              | 3281914        | 4512031        |
| Diabetics with coronary heart disease            | 140166        | 82236         | 45652         | 1030849        | 434656         | 10938        | 2067                    | 287639              | 305636              | 2061614        | 2656956        |
| Diabetics with stroke and coronary heart disease | 90.39         | 100.62        | 40.29         | 1238.83        | 715.68         | 4.58         | 0.75                    | 257.43              | 336.57              | 2376.27        | 2971           |
| <b>TOTAL - reference</b>                         | <b>340124</b> | <b>174522</b> | <b>130497</b> | <b>2385322</b> | <b>2023395</b> | <b>35282</b> | <b>6960</b>             | <b>695902</b>       | <b>1123192</b>      | <b>5345904</b> | <b>7171958</b> |
